# Supplementary material for: One-Pot Metal-Free Synthesis of 3-CF3-1,3-Oxazinopyridines by Reaction of Pyridines with CF3CO-Acetylenes
Source: PubMed Central journal article supplement (PMC6804262; doi:10.3390/molecules24193594), 2019-10-06
Supplement: molecules-24-03594-s001.pdf [file molecules-24-03594-s001.pdf]

# One-pot metal free synthesis of 3-CF<sub>3</sub>-1,3-oxazinopyridines by assembly of pyridines with CF<sub>3</sub>CO-acetylenes

Vasiliy M. Muzalevskiy<sup>1</sup>, Zoia A. Sizova<sup>1</sup>, Kseniya V. Belyaeva<sup>2</sup>, Boris A. Trofimov<sup>\*2</sup>,  
Valentine G. Nenajdenko<sup>\*1</sup>

<sup>1</sup> M. V. Lomonosov Moscow State University, Department of Chemistry, Leninskie Gory 1, Moscow, 119991 Russian Federation; muzvas@mail.ru (V.M.M); syzova@mail.ru (Z.A.S.)

<sup>2</sup> A. E. Favorsky Irkutsk Institute of Chemistry, Siberian Branch, Russian Academy of Sciences, 1 Favorsky Str., Irkutsk, 664033 Russian Federation; Fax: (395-2)41-93-46; belyaeva@irioch.irk.ru (K.V.B.)

\* Correspondence: boris\_trofimov@irioch.irk.ru (B.A.T.); nenajdenko@gmail.com (V.G.N.);

## Table of contents

|                                                                       |         |
|-----------------------------------------------------------------------|---------|
| General Details                                                       | S2      |
| Reaction of CF <sub>3</sub> -ynones and pyridines (general procedure) | S2      |
| Characterization data of compounds 3                                  | S2-S12  |
| Copies of all NMR spectra of compounds 3                              | S13-S72 |

## General details

$^1\text{H}$ ,  $^{13}\text{C}$  and  $^{19}\text{F}$  NMR spectra were recorded on Bruker AVANCE 400 MHz spectrometer in  $\text{CD}_3\text{CN}$  and  $\text{CDCl}_3$  at 400.1, 100.6 and 376.3 MHz respectively. Chemical shifts ( $\delta$ ) in ppm are reported with the use of the residual  $\text{CHD}_2\text{CN}$  and chloroform signals (1.94 and 7.25 for  $^1\text{H}$  and 77.0 for  $^{13}\text{C}$ ) as internal reference. The  $^{19}\text{F}$  chemical shifts were referenced to  $\text{C}_6\text{F}_6$ , (-162.9 ppm). HRMS (ESI-TOF) spectra were measured with an Orbitrap Elite instrument. TLC analysis was performed on "Merck 60 F<sub>254</sub>" plates. All reagents were of reagent grade and were used as such or distilled prior to use.  $\text{CF}_3$ -ynones **2** were prepared as reported previously.[ Muzalevskiy, V. M. Rulev, A. Yu.; Romanov, A. R.; Kondrashov, E. V.; Ushakov, I. A.; Chertkov, V. A.; Nenajdenko, V. G. Selective, Metal-Free Approach to 3- or 5- $\text{CF}_3$ -Pyrazoles: Solvent Switchable Reaction of  $\text{CF}_3$ -Ynones with Hydrazines. *J. Org. Chem.* **2017**, *82*, 7200-7214.] Melting points were determined on an Electrothermal 9100 apparatus.

## Reaction of $\text{CF}_3$ -ynones and pyridines (general procedure)

A 4 mL vial with a screw cap was charged with  $\text{CF}_3$ -ynone **2** (1-1.05 mmol, 2-2.1 equiv.)\* and then pyridine **1** (0.5 mmol, 1 equiv.) was added in one portion. After vigorous stirring for several minutes the reaction mixture became viscous due to crystallization of the product. At that moment MeCN (0.5 mL) was added to form homogeneous solution again and the reaction mixture was left overnight at stirring. Next volatiles were evaporated in vacuo, the residue was crystallized from appropriate amount of ether-hexane mixtures or purified via column chromatography on silica gel using mixtures of hexane with  $\text{CH}_2\text{Cl}_2$ .

\*-In case of solid  $\text{CF}_3$ -ynones **2** minimal amount (as much as possible) of MeCN (0.1-0.2 mL) was added to form clear solution.

**2,2,2-Trifluoro-1-(4-phenyl-2-(phenylethynyl)-2-(trifluoromethyl)-2H,9aH-pyrido[2,1-b][1,3]oxazin-3-yl)ethan-1-one (3a)**. Obtained from pyridine **1a** (0.042 g, 0.53 mmol) and  $\text{CF}_3$ -ynone **2a** (0.212 g, 1.071 mmol). Yellow-brown powder, m.p. 109.4-111.8 °C (hexane), yield 0.238 g (94%). ( $2S^*,9aS^*$ ):( $2R^*,9aS^*$ )-isomers ratio is 90:10 ( $^{19}\text{F}$  NMR). HRMS (ESI-TOF): m/z  $[\text{M}+\text{H}]^+$  Calcd for  $\text{C}_{25}\text{H}_{16}\text{F}_6\text{NO}_2^+$ : 476.1080; found: 476.1085.

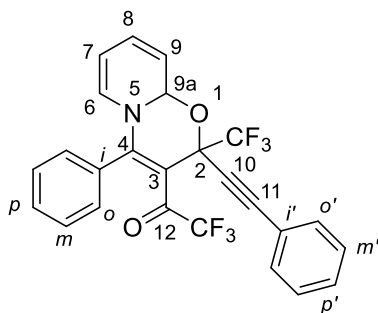

( $2S^*,9aS^*$ )-**3a**:  $^1\text{H}$  NMR (400.1 MHz,  $\text{CDCl}_3$ ):  $\delta$  7.68-7.39 (m, 7H), 7.37-7.27 (m, 3H), 6.50 (dd,  $^3J_{8,9} = 9.7$  Hz,  $^3J_{7,8} = 6.1$  Hz, 1H, H-8), 6.46 (d,  $^3J_{6,7} = 7.7$  Hz, 1H, H-6), 6.00 (dd,  $^3J_{8,9} = 9.7$  Hz,  $^3J_{9a,9} = 3.9$  Hz, 1H, H-9), 5.74 (d,  $^3J_{9a,9} = 3.9$  Hz, 1H, H-9a), 5.50 (pseudo-td,  $^3J \sim 7$  Hz,  $^4J \sim 1$  Hz, 1H, H-7) ppm.  $^{13}\text{C}$  NMR (100.6 MHz,  $\text{CDCl}_3$ ):  $\delta$  180.7 (q,  $^2J_{\text{CF}} = 35.0$  Hz, C-12), 160.3 (C-4), 133.2, 132.1, 131.4 ( $C_i$  from Ar), 129.5, 129.3, 129.2, 128.3 (C-8), 126.2 (C-6), 125.8, 122.6 (q,  $^1J_{\text{CF}} = 286.6$  Hz,  $\text{CF}_3$ ), 121.1 ( $C_i$  from Ar), 116.5 (C-9), 115.5 [q,  $^1J_{\text{CF}} = 292.7$  Hz,  $\text{C}(\text{O})\text{CF}_3$ ], 104.0 (C-7), 88.4 (C-11), 81.3 (C-10), 79.1 (C-9a), 73.7 (q,  $^2J_{\text{CF}} = 33.9$  Hz, C-2) ppm.  $^{19}\text{F}$  NMR (376.3 MHz,  $\text{CDCl}_3$ ):  $\delta$  -72.5 [ $\text{C}(\text{O})\text{CF}_3$ ], -77.3 ( $\text{CF}_3$ ) ppm.

( $2R^*,9aS^*$ )-**3a'**:  $^1\text{H}$  NMR (400.1 MHz,  $\text{CDCl}_3$ ):  $\delta$  6.43 (dd,  $^3J_{8,9} = 9.8$  Hz,  $^3J_{7,8} = 6.1$  Hz, 1H, H-8), 6.28 (d,  $^3J_{6,7} = 7.6$  Hz, 1H, H-6), 6.11 (d,  $^3J_{9a,9} = 4.0$  Hz, 1H, H-9a), 5.85 (dd,  $^3J_{8,9} = 9.8$  Hz,  $^3J_{9a,9} = 4.0$  Hz, 1H, H-9), 5.34 (pseudo-td,  $^3J \sim 7$  Hz,  $^4J = 1$  Hz, 1H, H-7) ppm. Other signals are overlapped

with those of major isomer.  $^{13}\text{C}$  NMR (100.6 MHz,  $\text{CDCl}_3$ ):  $\delta$  133.9, 132.3, 128.9, 126.5, 126.3, 115.0, 109.4, 102.2 ppm. Other signals are overlapped with those of major isomer or can not be seen in the spectrum due to the low concentration of minor isomer.  $^{19}\text{F}$  NMR (376.3 MHz,  $\text{CDCl}_3$ ):  $\delta$  -74.6 [ $\text{C}(\text{O})\text{CF}_3$ ], -76.2 ( $\text{CF}_3$ ) ppm.

**1-(4-(4-(*Tert*-butyl)phenyl)-2-((4-(*tert*-butyl)phenyl)ethynyl)-2-(trifluoromethyl)-2*H*,9*aH*-pyrido[2,1-*b*][1,3]oxazin-3-yl)-2,2,2-trifluoroethan-1-one (3b).** Obtained from pyridine **1a** (0.041 g, 0.518 mmol) and  $\text{CF}_3$ -ynone **2b** (0.267 g, 1.051 mmol). Yellow powder, m.p. 130.0-132.7 °C (hexane), yield 0.300 g (98%). ( $2S^*,9aS^*$ ):( $2R^*,9aS^*$ )-isomers ratio is 90:10 ( $^{19}\text{F}$  NMR). HRMS (ESI-TOF):  $m/z$  [ $\text{M}+\text{H}$ ] $^+$  Calcd for  $\text{C}_{33}\text{H}_{32}\text{F}_6\text{NO}_2$  $^+$ : 588.2332; found: 588.2340.

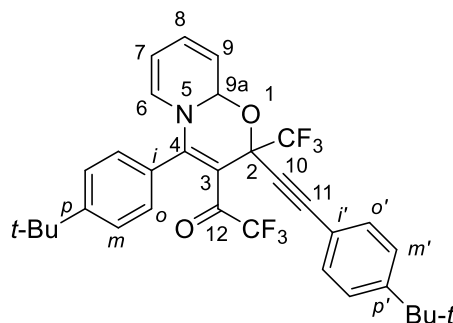

( $2S^*,9aS^*$ )-**3b**:  $^1\text{H}$  NMR (400.1 MHz,  $\text{CDCl}_3$ ):  $\delta$  7.52 (d,  $^3J = 8.4$  Hz, 2H), 7.47-7.36 (m, 4H), 7.32 (d,  $^3J = 8.4$  Hz, 2H), 6.52 (d,  $^3J_{6,7} = 7.8$  Hz, 1H, H-6), 6.48 (dd,  $^3J_{8,9} = 9.8$  Hz,  $^3J_{7,8} = 6.1$  Hz, 1H, H-8), 5.99 (dd,  $^3J_{8,9} = 9.8$  Hz,  $^3J_{9a,9} = 3.9$  Hz, 1H, H-9), 5.72 (d,  $^3J_{9a,9} = 3.9$  Hz, 1H, H-9a), 5.49 (pseudo-t,  $^3J \sim 7$  Hz, 1H, H-7), 1.35 (s, 9H, 3Me from *t*-Bu), 1.29 (s, 9H, 3Me from *t*-Bu) ppm.  $^{13}\text{C}$  NMR (100.6 MHz,  $\text{CDCl}_3$ ):  $\delta$  180.8 (q,  $^2J_{\text{CF}} = 35.0$  Hz, C-12), 160.4 (C-4), 157.2 ( $\text{C}_p$  from Ar), 152.7 ( $\text{C}_{p'}$  from Ar), 131.9 ( $\text{C}_{m,m'}$  from Ph), 128.6 (q,  $^3J_{\text{CF}} = 2.2$  Hz, C-3), 126.4, 126.3 (C-8), 126.1 (C-6), 125.3 ( $\text{C}_{o,o'}$  from Ar), 122.6 (q,  $^1J_{\text{CF}} = 286.6$  Hz,  $\text{CF}_3$ ), 118.1 ( $\text{C}_i$  from Ar), 116.5 (C-9), 115.7 [q,  $^1J_{\text{CF}} = 292.5$  Hz,  $\text{C}(\text{O})\text{CF}_3$ ], 103.6 (C-7), 88.5 (C-11), 80.9 (C-10), 79.0 (C-9a), 73.8 (q,  $^2J_{\text{CF}} = 34.6$  Hz, C-2), 35.2, 34.8, 31.1, 31.0 ppm.  $^{19}\text{F}$  NMR (376.3 MHz,  $\text{CDCl}_3$ ):  $\delta$  -72.5 [ $\text{C}(\text{O})\text{CF}_3$ ], -77.4 ( $\text{CF}_3$ ) ppm.

( $2R^*,9aS^*$ )-**3b'**:  $^1\text{H}$  NMR (400.1 MHz,  $\text{CDCl}_3$ ):  $\delta$  6.43 (dd,  $^3J_{8,9} = 9.8$  Hz,  $^3J_{7,8} = 6.0$  Hz, 1H, H-8), 6.33 (d,  $^3J_{6,7} = 7.6$  Hz, 1H, H-6), 6.10 (d,  $^3J_{9a,9} = 3.9$  Hz, 1H, H-9a), 5.84 (dd,  $^3J_{8,9} = 9.8$  Hz,  $^3J_{9a,9} = 3.9$  Hz, 1H, H-9), 5.33 (pseudo-t,  $^3J \sim 7$  Hz, 1H, H-7), 1.33 (s, 9H, 3Me from *t*-Bu), 1.30 (s, 9H, 3Me from *t*-Bu) ppm. Other signals are overlapped with those of major isomer.  $^{13}\text{C}$  NMR (100.6 MHz,  $\text{CDCl}_3$ ):  $\delta$  132.0, 126.6, 126.51, 126.49, 125.2, 109.2, 35.1, 31.2, 30.9 ppm. Other signals are overlapped with those of major isomer or can not be seen in the spectrum due to the low concentration of minor isomer.  $^{19}\text{F}$  NMR (376.3 MHz,  $\text{CDCl}_3$ ):  $\delta$  -74.6 [ $\text{C}(\text{O})\text{CF}_3$ ], -76.2 ( $\text{CF}_3$ ) ppm.

**1-(4-(4-Methoxyphenyl)-2-((4-methoxyphenyl)ethynyl)-2-(trifluoromethyl)-2*H*,9*aH*-pyrido[2,1-*b*][1,3]oxazin-3-yl)-2,2,2-trifluoroethan-1-one (3c).** Obtained from pyridine **1a** (0.041 g, 0.518 mmol) and  $\text{CF}_3$ -ynone **2c** (0.239 g, 1.048 mmol). Light brown powder, m.p. 117.3-118.7 °C (hexane), yield 0.242 g (87%). ( $2S^*,9aS^*$ ):( $2R^*,9aS^*$ )-isomers ratio is 90:10 ( $^{19}\text{F}$  NMR). HRMS (ESI-TOF):  $m/z$  [ $\text{M}+\text{H}$ ] $^+$  Calcd for  $\text{C}_{27}\text{H}_{20}\text{F}_6\text{NO}_4$  $^+$ : 536.1291; found: 536.1296.

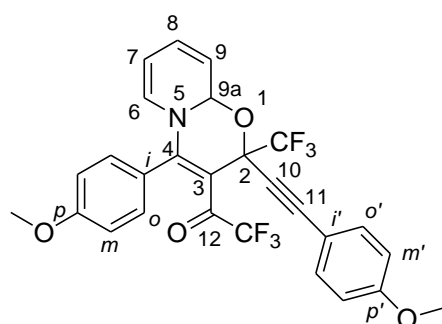

( $2S^*,9aS^*$ )-**3c**:  $^1\text{H}$  NMR (400.1 MHz,  $\text{CDCl}_3$ ):  $\delta$  7.48-7.30 (m, 4H), 7.07-6.91 (m, 2H), 6.82 (d,  $^3J = 8.9$  Hz, 2H), 6.49 (d,  $^3J_{6,7} = 7.0$  Hz, 1H, H-6), 6.48 (dd,  $^3J_{8,9} = 9.8$  Hz,  $^3J_{7,8} = 6.1$  Hz, 1H, H-8), 5.99 (dd,  $^3J_{8,9} = 9.8$  Hz,  $^3J_{9a,9} = 4.1$  Hz, 1H, H-9), 5.71 (d,  $^3J_{9a,9} = 4.1$  Hz, 1H, H-9a), 5.49 (pseudo-td,  $^3J \sim 7$  Hz,  $^3J \sim 1$  Hz, 1H, H-7), 3.88 (s, 3H, MeO), 3.79 (s, 3H, MeO) ppm.  $^{13}\text{C}$  NMR (100.6 MHz,  $\text{CDCl}_3$ ):  $\delta$  180.6 (q,  $^2J_{\text{CF}} = 34.7$  Hz, C-12), 163.7, 160.4 (C-4), 160.3, 133.7, 126.3 (C-8), 126.0 (C-6), 123.7, 122.7 (q,  $^1J_{\text{CF}} = 286.8$  Hz,  $\text{CF}_3$ ), 116.5 (C-9), 115.7 [q,  $^1J_{\text{CF}} = 293.0$  Hz,  $\text{C}(\text{O})\text{CF}_3$ ], 113.9, 113.2, 108.6, 103.8 (C-7), 88.3 (C-11), 80.3 (C-10), 78.9 (C-9a), 73.9 (q,  $^2J_{\text{CF}} = 34.3$  Hz, C-2), 55.6, 55.2 ppm.  $^{19}\text{F}$  NMR (376.3 MHz,  $\text{CDCl}_3$ ):  $\delta$  -72.4 [ $\text{C}(\text{O})\text{CF}_3$ ], -77.5 ( $\text{CF}_3$ ) ppm.

(2*R*<sup>\*</sup>,9*aS*<sup>\*</sup>)-**3c'**: <sup>1</sup>H NMR (400.1 MHz, CDCl<sub>3</sub>): δ 7.52 (d, <sup>3</sup>J = 8.9 Hz, 2H), 6.42 (dd, <sup>3</sup>J<sub>8,9</sub> = 9.8 Hz, <sup>3</sup>J<sub>7,8</sub> = 6.1 Hz, 1H, H-8), 6.31 (d, <sup>3</sup>J<sub>6,7</sub> = 7.5 Hz, 1H, H-6), 6.07 (d, <sup>3</sup>J<sub>9*a*,9</sub> = 4.1 Hz, 1H, H-9*a*), 5.84 (dd, <sup>3</sup>J<sub>8,9</sub> = 9.8 Hz, <sup>3</sup>J<sub>9*a*,9</sub> = 4.1 Hz, 1H, H-9), 5.33 (pseudo-t, <sup>3</sup>J ~ 7 Hz, 1H, H-7), 3.86 (s, 3H, MeO), 3.81 (s, 3H, MeO) ppm. Other signals are overlapped with those of major isomer. <sup>13</sup>C NMR (100.6 MHz, CDCl<sub>3</sub>): δ 136.0, 133.8, 131.8, 126.51, 126.48, 114.4, 55.5 ppm. Other signals are overlapped with those of major isomer or can not be seen in the spectrum due to the low concentration of minor isomer. <sup>19</sup>F NMR (376.3 MHz, CDCl<sub>3</sub>): δ -74.6 [C(O)CF<sub>3</sub>], -76.2 (CF<sub>3</sub>) ppm.

**1-(4-(4-Bromophenyl)-2-((4-bromophenyl)ethynyl)-2-(trifluoromethyl)-2*H*,9*aH*-pyrido[2,1-*b*][1,3]oxazin-3-yl)-2,2,2-trifluoroethan-1-one (3d)**. Obtained from pyridine **1a** (0.0395 g, 0.5 mmol) and CF<sub>3</sub>-ynone **2d** (0.292 g, 1.054 mmol). Yellow-brown powder, m.p. 83.9-86.7 °C (hexane), yield 0.244 g (77%). (2*S*<sup>\*</sup>,9*aS*<sup>\*</sup>):(2*R*<sup>\*</sup>,9*aS*<sup>\*</sup>)-isomers ratio is 89:11 (<sup>19</sup>F NMR). HRMS (ESI-TOF): m/z [M+H]<sup>+</sup> Calcd for C<sub>25</sub>H<sub>14</sub>Br<sub>2</sub>F<sub>6</sub>NO<sub>2</sub><sup>+</sup>: 633.9270; found: 633.9282.

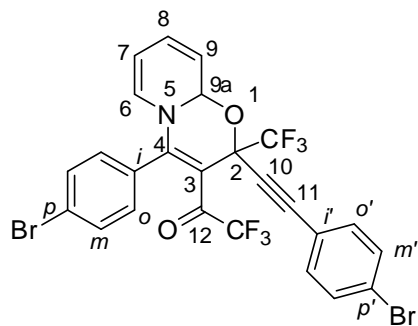

(2*S*<sup>\*</sup>,9*aS*<sup>\*</sup>)-**3d**: <sup>1</sup>H NMR (400.1 MHz, CDCl<sub>3</sub>): δ 7.68-7.29 (m, 8H), 6.49 (dd, <sup>3</sup>J<sub>8,9</sub> = 9.8 Hz, <sup>3</sup>J<sub>7,8</sub> = 6.1 Hz, 1H, H-8), 6.41 (d, <sup>3</sup>J<sub>6,7</sub> = 7.6 Hz, 1H, H-6), 6.00 (dd, <sup>3</sup>J<sub>8,9</sub> = 9.8 Hz, <sup>3</sup>J<sub>9*a*,9</sub> = 3.9 Hz, 1H, H-9), 5.69 (d, <sup>3</sup>J<sub>9*a*,9</sub> = 3.9 Hz, 1H, H-9*a*), 5.53 (pseudo-t, <sup>3</sup>J ~ 7 Hz, 1H, H-7) ppm. <sup>13</sup>C NMR (100.6 MHz, CDCl<sub>3</sub>): δ 180.4 (q, <sup>2</sup>J<sub>CF</sub> = 35.4 Hz, C-12), 159.3 (C-4), 149.6, 133.5, 132.9, 131.6, 130.2, 128.5, 126.3 (C-8), 125.4 (C-6), 123.9, 122.4 (q, <sup>1</sup>J<sub>CF</sub> = 286.8 Hz, CF<sub>3</sub>), 119.9, 116.7 (C-9), 115.5 [q, <sup>1</sup>J<sub>CF</sub> = 292.7 Hz, C(O)CF<sub>3</sub>], 109.4, 104.5 (C-7), 87.4 (C-11), 82.2 (C-10), 79.2 (C-9*a*), 73.6 (q, <sup>2</sup>J<sub>CF</sub> = 34.3 Hz, C-2) ppm. <sup>19</sup>F NMR (376.3 MHz, CDCl<sub>3</sub>): δ -72.3 [C(O)CF<sub>3</sub>], -77.3 (CF<sub>3</sub>) ppm.

(2*R*<sup>\*</sup>,9*aS*<sup>\*</sup>)-**3d'**: <sup>1</sup>H NMR (400.1 MHz, CDCl<sub>3</sub>): δ 6.45-6.42 (m, 1H, H-8), 6.22 (d, <sup>3</sup>J<sub>6,7</sub> = 7.5 Hz, 1H, H-6), 6.07 (d, <sup>3</sup>J<sub>9*a*,9</sub> = 4.0 Hz, 1H, H-9*a*), 5.84 (dd, <sup>3</sup>J<sub>8,9</sub> = 9.8 Hz, <sup>3</sup>J<sub>9*a*,9</sub> = 4.0 Hz, 1H, H-9), 5.36 (pseudo-t, <sup>3</sup>J = 6.8 Hz, 1H, H-7) ppm. Other signals are overlapped with those of major isomer. <sup>13</sup>C NMR (100.6 MHz, CDCl<sub>3</sub>): δ 136.1, 135.1, 133.7, 131.6, 126.5, 126.0, 123.8, 115.1, 102.6 ppm. Other signals are overlapped with those of major isomer or can not be seen in the spectrum due to the low concentration of minor isomer. <sup>19</sup>F NMR (376.3 MHz, CDCl<sub>3</sub>): δ -74.5 [C(O)CF<sub>3</sub>], -76.2 (CF<sub>3</sub>) ppm.

**1-(4-(4-Chlorophenyl)-2-((4-chlorophenyl)ethynyl)-2-(trifluoromethyl)-2*H*,9*aH*-pyrido[2,1-*b*][1,3]oxazin-3-yl)-2,2,2-trifluoroethan-1-one (3e)**. Obtained from pyridine **1a** (0.042 g, 0.53 mmol) and CF<sub>3</sub>-ynone **2e** (0.254 g, 1.09 mmol). Yellow-brown powder, m.p. 68-70 °C (hexane), yield 0.286 g (99%). (2*S*<sup>\*</sup>,9*aS*<sup>\*</sup>):(2*R*<sup>\*</sup>,9*aS*<sup>\*</sup>)-isomers ratio is 89:11 (<sup>19</sup>F NMR). HRMS (ESI-TOF): m/z [M+H]<sup>+</sup> Calcd for C<sub>25</sub>H<sub>14</sub>Cl<sub>2</sub>F<sub>6</sub>NO<sub>2</sub><sup>+</sup>: 544.0300; found: 544.0308.

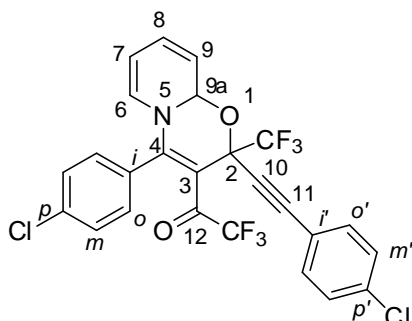

(2*S*<sup>\*</sup>,9*aS*<sup>\*</sup>)-**3e**: <sup>1</sup>H NMR (400.1 MHz, CDCl<sub>3</sub>): δ 7.52-7.28 (m, 8H), 6.49 (dd, <sup>3</sup>J<sub>8,9</sub> = 9.8 Hz, <sup>3</sup>J<sub>7,8</sub> = 6.1 Hz, 1H, H-8), 6.41 (d, <sup>3</sup>J<sub>6,7</sub> = 7.6 Hz, 1H, H-6), 6.00 (dd, <sup>3</sup>J<sub>8,9</sub> = 9.8 Hz, <sup>3</sup>J<sub>9*a*,9</sub> = 4.0 Hz, 1H, H-9), 5.69 (d, <sup>3</sup>J<sub>9*a*,9</sub> = 4.0 Hz, 1H, H-9*a*), 5.53 (pseudo-t, <sup>3</sup>J ~ 7 Hz, 1H, H-7) ppm. <sup>1</sup>H NMR (400.1 MHz, CD<sub>3</sub>CN): δ 7.73-7.31 (m, 8H), 6.57-6.52 (m, 2H, H-8, H-6), 6.03 (dd, <sup>3</sup>J<sub>8,9</sub> = 9.8 Hz, <sup>3</sup>J<sub>9*a*,9</sub> = 3.8 Hz, 1H, H-9), 5.75 (d, <sup>3</sup>J<sub>9*a*,9</sub> = 3.8 Hz, 1H, H-9*a*), 5.61 (pseudo-t, <sup>3</sup>J = 7.2 Hz, 1H, H-7) ppm. <sup>13</sup>C NMR (100.6 MHz, CDCl<sub>3</sub>): δ 180.3 (q, <sup>2</sup>J<sub>CF</sub> = 34.7 Hz, C-12), 159.2 (C-4), 149.6, 140.0, 135.6, 133.3, 129.9, 128.7, 126.3 (C-8), 125.4 (C-6), 122.4 (q, <sup>1</sup>J<sub>CF</sub> = 286.8 Hz, CF<sub>3</sub>), 119.4, 116.7 (C-9), 115.5 [q, <sup>1</sup>J<sub>CF</sub> = 292.7 Hz,

C(O)CF<sub>3</sub>], 109.4, 104.5 (C-7), 87.3 (C-11), 82.0 (C-10), 79.1 (C-9a), 73.6 (q, <sup>2</sup>J<sub>CF</sub> = 34.3 Hz, C-2) ppm. <sup>19</sup>F NMR (376.3 MHz, CD<sub>3</sub>CN): δ -70.0 [C(O)CF<sub>3</sub>], -75.4 (CF<sub>3</sub>) ppm. <sup>19</sup>F NMR (376.3 MHz, CDCl<sub>3</sub>): δ -72.2 [C(O)CF<sub>3</sub>], -77.3 (CF<sub>3</sub>) ppm.

(2*R*\*,9*aS*\*)-3*e*': <sup>1</sup>H NMR (400.1 MHz, CDCl<sub>3</sub>): δ 6.22 (d, <sup>3</sup>J<sub>6,7</sub> = 7.6 Hz, 1H, H-6), 6.07 (d, <sup>3</sup>J<sub>9a,9</sub> = 4.0 Hz, 1H, H-9a), 5.85 (dd, <sup>3</sup>J<sub>8,9</sub> = 9.8 Hz, <sup>3</sup>J<sub>9a,9</sub> = 4.0 Hz, 1H, H-9), 5.36 (pseudo-t, <sup>3</sup>J ~ 7 Hz, 1H, H-7) ppm. Other signals are overlapped with those of major isomer. <sup>1</sup>H NMR (400.1 MHz, CD<sub>3</sub>CN): δ 6.48-6.42 (m, 1H, H-8), 6.32 (d, <sup>3</sup>J<sub>6,7</sub> = 7.5 Hz, 1H, H-6), 5.89 (dd, <sup>3</sup>J<sub>8,9</sub> = 9.8 Hz, <sup>3</sup>J<sub>9a,9</sub> = 3.9 Hz, 1H, H-9), 5.42 (pseudo-t, <sup>3</sup>J = 6.8 Hz, 1H, H-7) ppm. Other signals are overlapped with those of major isomer. <sup>13</sup>C NMR (100.6 MHz, CDCl<sub>3</sub>): δ 136.1, 133.5, 129.7, 128.6, 126.0, 123.9, 115.1, 102.6 ppm. Other signals are overlapped with those of major isomer or can not be seen in the spectrum due to the low concentration of minor isomer. <sup>19</sup>F NMR (376.3 MHz, CD<sub>3</sub>CN): δ -72.2 [C(O)CF<sub>3</sub>], -74.1 (CF<sub>3</sub>) ppm. <sup>19</sup>F NMR (376.3 MHz, CDCl<sub>3</sub>): δ -74.4 [C(O)CF<sub>3</sub>], -76.1 (CF<sub>3</sub>) ppm.

**1-(4-(4-Methylphenyl)-2-((4-methylphenyl)ethynyl)-2-(trifluoromethyl)-2*H*,9*aH*-pyrido[2,1-*b*][1,3]oxazin-3-yl)-2,2,2-trifluoroethan-1-one (3*f*).** Obtained from pyridine **1a** (0.044 g, 0.556 mmol) and CF<sub>3</sub>-ynone **2f** (0.240 g, 1.13 mmol). Yellow-brown powder, m.p. 95.2-99.1 °C (hexane), yield 0.256 g (91%). (2*S*\*,9*aS*\*):(2*R*\*,9*aS*\*)-isomers ratio is 91:9 (<sup>19</sup>F NMR). HRMS (ESI-TOF): m/z [M+H]<sup>+</sup> Calcd for C<sub>27</sub>H<sub>20</sub>F<sub>6</sub>NO<sub>2</sub><sup>+</sup>: 504.1393; found: 504.1401.

(2*S*\*,9*aS*\*)-3*f*: <sup>1</sup>H NMR (400.1 MHz, CDCl<sub>3</sub>): δ 7.54-7.10 (m, 8H), 6.50-6.47 (m, 2H, H-8, H-6), 6.00 (dd, <sup>3</sup>J<sub>8,9</sub> = 10.0 Hz, <sup>3</sup>J<sub>9a,9</sub> = 3.8 Hz, 1H, H-9), 5.74 (d, <sup>3</sup>J<sub>9a,9</sub> = 3.8 Hz, 1H, H-9a), 5.49 (pseudo-t, <sup>3</sup>J = 6.7 Hz, 1H, H-7), 2.44 (s, 3H, Me), 2.33 (s, 3H, Me) ppm. <sup>13</sup>C NMR (100.6 MHz, CDCl<sub>3</sub>): δ 180.7 (q, <sup>2</sup>J<sub>CF</sub> = 35.0 Hz, C-12), 160.5 (C-4), 139.5, 134.0, 132.0, 130.2, 129.0, 128.7, 126.2 (C-8), 125.9 (C-6), 122.6 (q, <sup>1</sup>J<sub>CF</sub> = 286.8 Hz, CF<sub>3</sub>), 118.0, 116.4 (C-9), 115.6 [q, <sup>1</sup>J<sub>CF</sub> = 293.4 Hz, C(O)CF<sub>3</sub>], 109.0, 103.8 (C-7), 88.5 (C-11), 80.8 (C-10), 79.0 (C-9a), 73.8 (q, <sup>2</sup>J<sub>CF</sub> = 34.3 Hz, C-2), 21.6, 21.5 ppm. <sup>19</sup>F NMR (376.3 MHz, CDCl<sub>3</sub>): δ -72.3 [C(O)CF<sub>3</sub>], -77.2 (CF<sub>3</sub>) ppm.

(2*R*\*,9*aS*\*)-3*f*': <sup>1</sup>H NMR (400.1 MHz, CDCl<sub>3</sub>): δ 6.47-6.41 (m, 1H, H-8), 6.30 (d, <sup>3</sup>J<sub>6,7</sub> = 7.6 Hz, 1H, H-6), 6.10 (d, <sup>3</sup>J<sub>9a,9</sub> = 3.8 Hz, 1H, H-9a), 5.84 (dd, <sup>3</sup>J<sub>8,9</sub> = 9.6 Hz, <sup>3</sup>J<sub>9a,9</sub> = 3.8 Hz, 1H, H-9), 5.33 (pseudo-t, <sup>3</sup>J ~ 7 Hz, 1H, H-7), 2.42 (s, 3H, Me), 2.36 (s, 3H, Me) ppm. Other signals are overlapped with those of major isomer. <sup>13</sup>C NMR (100.6 MHz, CDCl<sub>3</sub>): δ 143.2, 139.4, 132.1, 126.4, 118.4, 115.0, 102.0, 79.8 ppm. Other signals are overlapped with those of major isomer or can not be seen in the spectrum due to the low concentration of minor isomer. <sup>19</sup>F NMR (376.3 MHz, CDCl<sub>3</sub>): δ -74.4 [C(O)CF<sub>3</sub>], -76.1 (CF<sub>3</sub>) ppm.

**1-(4-(4-Methylthiophenyl)-2-((4-methylthiophenyl)ethynyl)-2-(trifluoromethyl)-2*H*,9*aH*-pyrido[2,1-*b*][1,3]oxazin-3-yl)-2,2,2-trifluoroethan-1-one (3*g*).** Obtained from pyridine **1a** (0.040 g, 0.506 mmol) and CF<sub>3</sub>-ynone **2g** (0.256 g, 1.05 mmol). Brown powder, m.p. 120.5-123.2 °C (hexane), yield 0.274 g (96%). (2*S*\*,9*aS*\*):(2*R*\*,9*aS*\*)-isomers ratio is 92:8 (<sup>19</sup>F NMR). HRMS (ESI-TOF): m/z [M+H]<sup>+</sup> Calcd for C<sub>27</sub>H<sub>20</sub>F<sub>6</sub>NO<sub>2</sub>S<sub>2</sub><sup>+</sup>: 568.0834; found: 568.0834.

(2*S*\*,9*aS*\*)-3*g*: <sup>1</sup>H NMR (400.1 MHz, CDCl<sub>3</sub>): δ 7.49-7.25 (m, 6H), 7.14 (d, 2H, <sup>3</sup>J = 8.5 Hz), 6.51-6.47 (m, 2H, H-8, H-6), 6.00 (dd, <sup>3</sup>J<sub>8,9</sub> = 9.7 Hz, <sup>3</sup>J<sub>9a,9</sub> = 3.8 Hz, 1H, H-9), 5.70 (d, <sup>3</sup>J<sub>9a,9</sub> = 3.8 Hz,

1H, H-9a), 5.50 (pseudo-t,  $^3J = 6.4$  Hz, 1H, H-7), 2.53 (s, 3H, Me), 2.46 (s, 3H, Me) ppm.  $^1\text{H}$  NMR (400.1 MHz,  $\text{CD}_3\text{CN}$ ):  $\delta$  7.58-7.30 (m, 6H), 7.24 (d, 2H,  $^3J = 8.7$  Hz), 6.57 (d,  $^3J_{6,7} = 7.6$  Hz, 1H, H-6), 6.54 (dd,  $^3J_{8,9} = 9.8$  Hz,  $^3J_{7,8} = 6.0$  Hz, 1H, H-8), 6.00 (dd,  $^3J_{8,9} = 9.8$  Hz,  $^3J_{9a,9} = 4.0$  Hz, 1H, H-9), 5.74 (d,  $^3J_{9a,9} = 4.0$  Hz, 1H, H-9a), 5.59 (pseudo-t,  $^3J = 6.8$  Hz, 1H, H-7), 2.53 (s, 3H, Me), 2.47 (s, 3H, Me) ppm.  $^{13}\text{C}$  NMR (100.6 MHz,  $\text{CD}_3\text{CN}$ ):  $\delta$  180.8 (q,  $^2J_{\text{CF}} = 34.1$  Hz, C-12), 162.6 (C-4), 148.1, 142.6, 135.2, 132.9, 131.8, 129.8, 127.1, 126.8 (C-8), 126.5 (C-6), 123.8 (q,  $^1J_{\text{CF}} = 285.8$  Hz,  $\text{CF}_3$ ), 117.8, 117.5, 116.7 [q,  $^1J_{\text{CF}} = 292.2$  Hz,  $\text{C}(\text{O})\text{CF}_3$ ], 108.7, 105.4 (C-7), 88.4 (C-11), 82.5 (C-10), 80.1 (C-9a), 74.5 (q,  $^2J_{\text{CF}} = 33.7$  Hz, C-2), 15.1, 14.7 ppm.  $^{19}\text{F}$  NMR (376.3 MHz,  $\text{CDCl}_3$ ):  $\delta$  -72.3 [ $\text{C}(\text{O})\text{CF}_3$ ], -77.4 ( $\text{CF}_3$ ) ppm.  $^{19}\text{F}$  NMR (376.3 MHz,  $\text{CD}_3\text{CN}$ ):  $\delta$  -70.0 [ $\text{C}(\text{O})\text{CF}_3$ ], -75.5 ( $\text{CF}_3$ ) ppm.

( $2R^*,9aS^*$ )-**3g'**:  $^1\text{H}$  NMR (400.1 MHz,  $\text{CDCl}_3$ ):  $\delta$  6.47-6.41 (m, 1H, H-8), 6.30 (d,  $^3J_{6,7} = 7.5$  Hz, 1H, H-6), 6.07 (d,  $^3J_{9a,9} = 4.0$  Hz, 1H, H-9a), 5.84 (dd,  $^3J_{8,9} = 9.7$  Hz,  $^3J_{9a,9} = 4.0$  Hz, 1H, H-9), 5.34 (pseudo-t,  $^3J = 6.8$  Hz, 1H, H-7), 2.51 (s, 3H, Me), 2.47 (s, 3H, Me) ppm. Other signals are overlapped with those of major isomer.  $^1\text{H}$  NMR (400.1 MHz,  $\text{CD}_3\text{CN}$ ):  $\delta$  6.45-6.37 (m, 2H, H-8, H-9a), 6.20 (d,  $^3J_{6,7} = 7.0$  Hz, 1H, H-6), 5.87 (dd,  $^3J_{8,9} = 9.8$  Hz,  $^3J_{9a,9} = 4.0$  Hz, 1H, H-9), 5.42 (t,  $^3J = 6.4$  Hz, 1H, H-7), 2.52 (s, 3H, Me), 2.50 (s, 3H, Me) ppm. Other signals are overlapped with those of major isomer.  $^{13}\text{C}$  NMR (100.6 MHz,  $\text{CD}_3\text{CN}$ ):  $\delta$  145.5, 142.8, 136.9, 133.1, 129.5, 129.0, 128.2, 126.7, 126.3, 104.4, 84.7, 15.1, 14.7 ppm. Other signals are overlapped with those of major isomer or can not be seen in the spectrum due to the low concentration of minor isomer.  $^{19}\text{F}$  NMR (376.3 MHz,  $\text{CDCl}_3$ ):  $\delta$  -74.4 [s, 3F,  $\text{C}(\text{O})\text{CF}_3$ ], -76.1 (s, 3F,  $\text{CF}_3$ ) ppm.  $^{19}\text{F}$  NMR (376.3 MHz,  $\text{CD}_3\text{CN}$ ):  $\delta$  -72.2 [ $\text{C}(\text{O})\text{CF}_3$ ], -74.0 ( $\text{CF}_3$ ) ppm.

**1-(4-(3,4-dimethylphenyl)-2-((3,4-dimethylphenyl)ethynyl)-2-(trifluoromethyl)-2H,9aH-pyrido[2,1-b][1,3]oxazin-3-yl)-2,2,2-trifluoroethan-1-one (3h)**. Obtained from pyridine **1a** (0.039 g, 0.49 mmol) and  $\text{CF}_3$ -ynone **2h** (0.232 g, 1.027 mmol). Yellow-brown powder, m.p. 72.6-74.6 °C (hexane), yield 0.215 g (83%). ( $2S^*,9aS^*$ ):( $2R^*,9aS^*$ )-isomers ratio is 92:8 ( $^{19}\text{F}$  NMR) HRMS (ESI-TOF): m/z [ $\text{M}+\text{H}$ ] $^+$  Calcd for  $\text{C}_{29}\text{H}_{24}\text{F}_6\text{NO}_2$  $^+$ : 532.1706; found: 532.1717.

( $2S^*,9aS^*$ )-**3h**:  $^1\text{H}$  NMR (400.1 MHz,  $\text{CDCl}_3$ ):  $\delta$  7.38-7.02 (m, 6H), 6.50-6.46 (m, 2H, H-8, H-6), 5.98 (dd,  $^3J_{8,9} = 10.0$  Hz,  $^3J_{9a,9} = 3.9$  Hz, 1H, H-9), 5.71 (d,  $^3J_{9a,9} = 3.9$  Hz, 1H, H-9a), 5.47 (pseudo-t,  $^3J = 6.5$  Hz, 1H, H-7), 2.34 (s, 3H, Me), 2.31 (s, 3H, Me), 2.24 (s, 3H, Me), 2.21 (s, 3H, Me) ppm.  $^{13}\text{C}$  NMR (100.6 MHz,  $\text{CDCl}_3$ ):  $\delta$  180.8 (q,  $^2J_{\text{CF}} = 35.0$  Hz, C-12), 160.6 (C-4), 138.3, 136.6, 133.0, 130.6, 129.5, 129.1, 126.2 (C-8), 126.1 (C-6), 122.7 (q,  $^1J_{\text{CF}} = 286.8$  Hz,  $\text{CF}_3$ ), 118.3, 116.4 (C-9), 115.6 [q,  $^1J_{\text{CF}} = 293.0$  Hz,  $\text{C}(\text{O})\text{CF}_3$ ], 109.0, 103.6 (C-7), 88.6 (C-11), 80.6 (C-10), 78.9 (C-9a), 73.8 (q,  $^2J_{\text{CF}} = 34.3$  Hz, C-2), 20.0, 19.7, 19.6 (br s), 19.4 ppm.  $^{19}\text{F}$  NMR (376.3 MHz,  $\text{CDCl}_3$ ):  $\delta$  -72.3 [ $\text{C}(\text{O})\text{CF}_3$ ], -77.3 ( $\text{CF}_3$ ) ppm.

( $2R^*,9aS^*$ )-**3h'**:  $^1\text{H}$  NMR (400.1 MHz,  $\text{CDCl}_3$ ):  $\delta$  6.44-6.40 (m, 1H, H-8), 6.31 (d,  $^3J_{6,7} = 7.6$  Hz, 1H, H-6), 6.08 (d,  $^3J_{9a,9} = 4.0$  Hz, 1H, H-9a), 5.83 (dd,  $^3J_{8,9} = 9.9$  Hz,  $^3J_{9a,9} = 4.0$  Hz, 1H, H-9), 5.31 (pseudo-t,  $^3J = 7.2$  Hz, 1H, H-7), 2.32 (s, 3H, Me), 2.28 (s, 3H, Me), 2.25 (s, 3H, Me) ppm. Other signals are overlapped with those of major isomer.  $^{13}\text{C}$  NMR (100.6 MHz,  $\text{CDCl}_3$ ):  $\delta$  142.7, 138.1, 134.8, 133.2, 131.7, 130.3, 129.7, 126.6, 126.5, 118.7, 114.9, 108.5, 101.8, 79.7, 20.2, 19.8 ppm. Other signals are overlapped with those of major isomer or can not be seen in the spectrum due to the low concentration of minor isomer.  $^{19}\text{F}$  NMR (376.3 MHz,  $\text{CDCl}_3$ ):  $\delta$  -74.4 [ $\text{C}(\text{O})\text{CF}_3$ ], -77.3 ( $\text{CF}_3$ ) ppm.

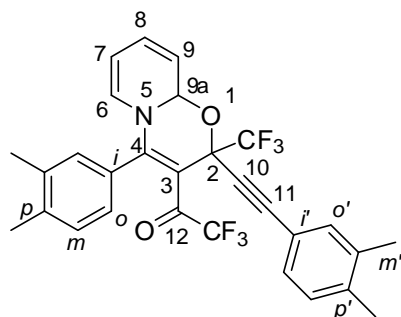

**2,2,2-Trifluoro-1-(4-(4-methoxynaphthalen-1-yl)-2-((4-methoxynaphthalen-1-yl)ethynyl)-2-(trifluoromethyl)-2H,9aH-pyrido[2,1-b][1,3]oxazin-3-yl)ethan-1-one (3i).** Obtained from

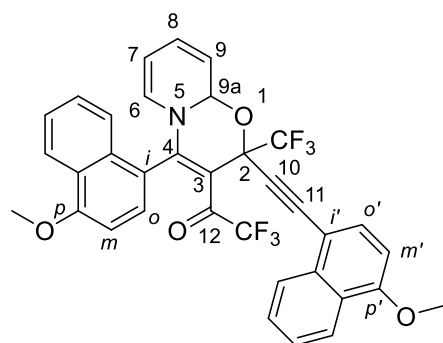

(2*S*\*,9*aS*\*)-**3i**: <sup>1</sup>H NMR (400.1 MHz, CDCl<sub>3</sub>): δ 8.39-8.36 (m, 1H), 8.25-8.22 (m, 2H), 7.70-7.47 (m, 7H), 6.87 (d, <sup>3</sup>J = 8.1 Hz, 1H), 6.75 (d, <sup>3</sup>J = 8.1 Hz, 1H), 6.49 (dd, <sup>3</sup>J<sub>8,9</sub> = 9.7 Hz, <sup>3</sup>J<sub>7,8</sub> = 6.1 Hz, 1H, H-8), 6.11-6.02 (m, 3H, H-6, H-9, H-9a), 5.36 (pseudo-t, <sup>3</sup>J = 7.2 Hz, 1H, H-7), 4.08 (s, 3H, MeO), 4.01 (s, 3H, MeO) ppm. <sup>13</sup>C NMR (100.6 MHz, CDCl<sub>3</sub>): δ 179.9 (q, <sup>2</sup>J<sub>CF</sub> = 34.7 Hz, C-12), 160.8 (C-4), 160.2, 156.7, 137.4, 134.4, 132.3, 131.7, 128.8, 127.6, 126.3 (C-8), 126.2 (C-6), 125.93, 125.87, 125.8, 125.1, 124.8, 123.1 (q, <sup>1</sup>J<sub>CF</sub> = 287.1 Hz, CF<sub>3</sub>), 123.1, 122.1, 120.7, 117.0 (C-9), 115.7 [q, <sup>1</sup>J<sub>CF</sub> = 292.9 Hz, C(O)CF<sub>3</sub>], 111.0, 109.7, 104.0, 103.5, 103.3, 86.7 (C-11), 84.9 (C-10), 78.6 (C-9a), 74.2 (q, <sup>2</sup>J<sub>CF</sub> = 33.9 Hz, C-2), 55.9, 55.6 ppm. <sup>19</sup>F NMR (376.3 MHz, CDCl<sub>3</sub>): δ major rotamer -71.6 [C(O)CF<sub>3</sub>], -76.8 (CF<sub>3</sub>); minor rotamer -73.2 [C(O)CF<sub>3</sub>], -78.1 (CF<sub>3</sub>) ppm.

(2*R*\*,9*aS*\*)-**3i'**: <sup>1</sup>H NMR (400.1 MHz, CDCl<sub>3</sub>): δ 8.32 (d, <sup>3</sup>J = 8.4 Hz, 1H), 7.96 (d, <sup>3</sup>J = 8.2 Hz, 1H), 6.86 (d, <sup>3</sup>J = 8.1 Hz, 1H), 6.81 (d, <sup>3</sup>J = 7.9 Hz, 1H), 4.04 (s, 3H, MeO), 4.02 (s, 3H, MeO) ppm. Other signals are overlapped with those of major isomer. <sup>13</sup>C NMR (100.6 MHz, CDCl<sub>3</sub>): δ 137.5, 135.0, 129.0, 126.6, 125.0, 122.9, 56.0, 55.8 ppm. Other signals are overlapped with those of major isomer or can not be seen in the spectrum due to the low concentration of minor isomer. <sup>19</sup>F NMR (376.3 MHz, CDCl<sub>3</sub>): δ major rotamer -74.1 [C(O)CF<sub>3</sub>], -75.9 (CF<sub>3</sub>); minor rotamer -74.3 [C(O)CF<sub>3</sub>], -76.2 (CF<sub>3</sub>) ppm.

**2,2,2-Trifluoro-1-(4-phenyl-2-(phenylethynyl)-2-(trifluoromethyl)-8-vinyl-2H,9aH-pyrido[2,1-b][1,3]oxazin-3-yl)ethan-1-one (3j).** Obtained from pyridine **1b** (0.054 g, 0.51 mmol)

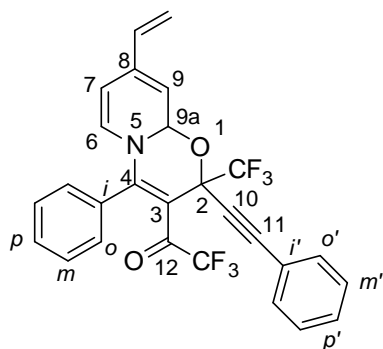

and CF<sub>3</sub>-ynone **2a** (0.206 g, 1.04 mmol). Brown powder, m.p. 80-83 °C (hexane), yield 0.249 g (97%). (2*S*\*,9*aS*\*):(2*R*\*,9*aS*\*)-isomers ratio is 89:11 (<sup>19</sup>F NMR). HRMS (ESI-TOF): m/z [M+H]<sup>+</sup> Calcd for C<sub>27</sub>H<sub>18</sub>F<sub>6</sub>NO<sub>2</sub><sup>+</sup>: 502.1246; found: 502.1246.

(2*S*\*,9*aS*\*)-**3j**: <sup>1</sup>H NMR (400.1 MHz, CDCl<sub>3</sub>): δ 7.67-7.44 (m, 7H), 7.37-7.28 (m, 3H), 6.49 (d, <sup>3</sup>J<sub>6,7</sub> = 8.0 Hz, 1H, H-6), 6.44 (dd, <sup>3</sup>J = 17.6 Hz, <sup>3</sup>J = 11.0 Hz, 1H, CH=CH<sub>2</sub>), 5.90 (d, <sup>3</sup>J<sub>9a,9</sub> = 4.5 Hz, 1H, H-9), 5.78 (d, <sup>3</sup>J<sub>9a,9</sub> = 4.5 Hz, 1H H-9a), 5.77 (dd, <sup>3</sup>J<sub>6,7</sub> = 8.0 Hz, <sup>4</sup>J<sub>7,9</sub> = 1.5 Hz, 1H, H-7), 5.56 (d, <sup>3</sup>J = 17.6 Hz, 1H, CH=CH<sub>2</sub>), 5.33 (d, <sup>3</sup>J = 11.0 Hz, 1H, CH<sub>2</sub>, CH=CH<sub>2</sub>) ppm. <sup>13</sup>C NMR (100.6 MHz, CDCl<sub>3</sub>): δ 180.9 (q, <sup>2</sup>J<sub>CF</sub> = 34.8 Hz, C-12), 160.2 (C-4), 135.2 (C, CH=CH<sub>2</sub>), 134.3, 133.3, 132.1 (C<sub>m,m'</sub> from Ar), 131.4 (q, <sup>1</sup>J<sub>CF</sub> = 1.7 Hz, C-3), 129.5 (br s), 129.3, 128.2 (C<sub>o,o'</sub> from Ar), 126.0 (C-6), 122.6, (q, <sup>1</sup>J<sub>CF</sub> = 286.9 Hz, CF<sub>3</sub>), 121.0, 116.6 (CH=CH<sub>2</sub>), 114.3 (CH=CH<sub>2</sub>), 115.5 [q, <sup>1</sup>J<sub>CF</sub> = 292.8 Hz, C(O)CF<sub>3</sub>], 109.3, 101.7 (C-7), 88.4 (C-11), 81.3 (C-10), 79.4 (C-9a), 73.9 (q, <sup>2</sup>J<sub>CF</sub> = 34.1 Hz, C-2) ppm. <sup>19</sup>F NMR (376.3 MHz, CDCl<sub>3</sub>): δ -72.5 [C(O)CF<sub>3</sub>], -77.2 (CF<sub>3</sub>) ppm.

(2*R*\*,9*aS*\*)-**3j'**: <sup>1</sup>H NMR (400.1 MHz, CDCl<sub>3</sub>): δ 6.31 (d, <sup>3</sup>J<sub>6,7</sub> = 7.9 Hz, 1H, H-6), 6.13-6.11 (m, 2H, H-9, H-9a), 5.60 (dd, <sup>3</sup>J = 7.9 Hz, <sup>3</sup>J = 1.6 Hz, 1H, H-7), 5.53 (d, <sup>3</sup>J = 17.4 Hz, 1H, CH=CH<sub>2</sub>), 5.51

(d,  $^3J = 17.2$  Hz, 1H, CH=CH<sub>2</sub>), 5.31 (d,  $^3J = 10.0$  Hz, 1H, CH=CH<sub>2</sub>) ppm. Other signals are overlapped with those of major isomer. <sup>13</sup>C NMR (100.6 MHz, CDCl<sub>3</sub>): δ 137.1, 135.4, 132.4, 132.2, 129.2, 128.7, 128.2, 127.2, 126.6, 126.0, 117.6, 116.5, 113.0, 99.8 ppm. Other signals are overlapped with those of major isomer or can not be seen in the spectrum due to the low concentration of minor isomer. <sup>19</sup>F NMR (376.3 MHz, CDCl<sub>3</sub>): δ -74.6 [C(O)CF<sub>3</sub>], -76.2 (CF<sub>3</sub>) ppm.

**4-Phenyl-2-(phenylethynyl)-3-(trifluoroacetyl)-2-(trifluoromethyl)-2H,9aH-pyrido[2,1-b][1,3]oxazine-8-carbaldehyde (3k).** Obtained from pyridine **1c** (0.0475 g, 0.44 mmol) and CF<sub>3</sub>-ynone **2a** (0.198 g, 1 mmol). Yellow powder, m.p. 77-79 °C (hexane), yield 0.178 g (80%). (2*S*\*,9*aS*\*):(2*R*\*,9*aS*\*)-isomers ratio is 89:11 (<sup>19</sup>F NMR). HRMS (ESI-TOF): m/z [M+H]<sup>+</sup> Calcd for C<sub>26</sub>H<sub>16</sub>F<sub>6</sub>NO<sub>3</sub><sup>+</sup>: 504.1029; found: 504.1035.

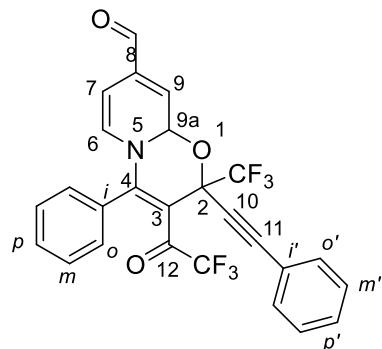

(2*S*\*,9*aS*\*)-**3k**: <sup>1</sup>H NMR (400.1 MHz, CD<sub>3</sub>CN): 9.70 (s, 1H, CHO), δ 7.75-7.25 (m, 10H), 6.81 (d,  $^3J = 4.2$  Hz, 1H, H-9), 6.66 (d,  $^3J = 7.8$  Hz, 1H, H-6), 6.06 (d,  $^3J = 4.2$  Hz, 1H, H-9*a*), 5.94 (dd,  $^3J = 7.8$  Hz,  $^3J = 1.5$  Hz, 1H, H-7) ppm. <sup>13</sup>C NMR (100.6 MHz, CD<sub>3</sub>CN): δ 192.2 (CHO), 181.7 (q,  $^2J_{CF} = 34.8$  Hz, C-12), 162.0 (C-4), 137.5, 134.9, 134.7, 134.0, 132.2 (q,  $^3J_{CF} = 1.8$  Hz), 130.9, 130.6 (br s), 130.2, 129.8, 129.6,

128.7, 123.7 (q,  $^1J_{CF} = 286.0$  Hz, CF<sub>3</sub>), 121.5, 116.5 [q,  $^1J_{CF} = 292.5$  Hz, C(O)CF<sub>3</sub>], 110.1, 99.0, 89.5 (C-11), 82.1 (C-10), 80.1 (C-9*a*), 75.2 (q,  $^2J_{CF} = 34.3$  Hz, C-2) ppm. <sup>19</sup>F NMR (376.3 MHz, CD<sub>3</sub>CN): δ -70.2 [C(O)CF<sub>3</sub>], -75.2 (CF<sub>3</sub>) ppm. <sup>19</sup>F NMR (376.3 MHz, CDCl<sub>3</sub>): δ -71.7 [C(O)CF<sub>3</sub>], -76.0 (CF<sub>3</sub>) ppm.

(2*S*\*,9*aS*\*)-**3k'**: <sup>1</sup>H NMR (400.1 MHz, CD<sub>3</sub>CN): 9.66 (s, 1H, CHO), 6.52-6.46 (m, 2H), 6.37 (d,  $^3J = 4.2$  Hz, 1H), 5.77 (dd,  $^3J = 7.7$  Hz,  $^3J = 1.5$  Hz, 1H) ppm. Other signals are overlapped with those of major isomer. <sup>13</sup>C NMR (100.6 MHz, CD<sub>3</sub>CN): δ 133.8, 132.9, 130.0, 129.7, 129.6, 129.4, 128.1, 115.1, 97.1, 83.8, 78.2 ppm. Other signals are overlapped with those of major isomer or can not be seen in the spectrum due to the low concentration of minor isomer. <sup>19</sup>F NMR (376.3 MHz, CD<sub>3</sub>CN): δ -72.6 [C(O)CF<sub>3</sub>], -74.4 (CF<sub>3</sub>) ppm. <sup>19</sup>F NMR (376.3 MHz, CDCl<sub>3</sub>): δ -73.6 [C(O)CF<sub>3</sub>], -75.2 (CF<sub>3</sub>) ppm.

**1-(8-Acetyl-4-phenyl-2-(phenylethynyl)-2-(trifluoromethyl)-2H,9aH-pyrido[2,1-b][1,3]oxazin-3-yl)-2,2,2-trifluoroethan-1-one (3l).** Obtained from pyridine **1d** (0.030 g, 0.25 mmol) and CF<sub>3</sub>-ynone **2a** (0.101 g, 0.51 mmol). Yellow powder, m.p. 122.8-124.2 °C (hexane), yield 0.071 g (55%). (2*S*\*,9*aS*\*):(2*R*\*,9*aS*\*)-isomers ratio is 87:13 (<sup>19</sup>F NMR). HRMS (ESI-TOF): m/z [M+H]<sup>+</sup> Calcd for C<sub>27</sub>H<sub>18</sub>F<sub>6</sub>NO<sub>3</sub><sup>+</sup>: 518.1185; found: 518.1214.

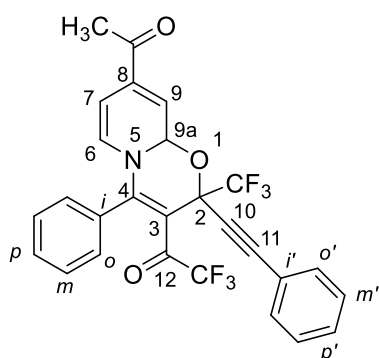

(2*S*\*,9*aS*\*)-**3l**: <sup>1</sup>H NMR (400.1 MHz, CDCl<sub>3</sub>): δ 7.66-7.45 (m, 7H), 7.38-7.29 (m, 3H), 6.72 (pseudo-d,  $^3J_{9a,9} \sim 4$  Hz, 1H, H-9), 6.54 (d,  $^3J_{6,7} = 7.8$  Hz, 1H, H-6), 6.04 (dd,  $^3J_{6,7} = 7.8$  Hz,  $^3J_{7,9} = 1.6$  Hz, 1H, H-7), 5.91 (d,  $^3J_{9a,9} = 4.2$  Hz, 1H, H-9*a*), 2.48 (s, 3H, Me) ppm. <sup>13</sup>C NMR (100.6 MHz, CDCl<sub>3</sub>): δ 195.6, 180.9 (q,  $^2J_{CF} = 35.4$  Hz, C-12), 159.3 (C-4), 136.5, 133.4, 132.1, 131.1 (q,  $^1J_{CF} = 1.7$  Hz, C-3), 129.6 (br s), 129.5, 128.3 (C<sub>o,o'</sub> from Ar), 126.7 (C-6), 122.4 (q,  $^1J_{CF} = 286.6$  Hz, CF<sub>3</sub>), 121.2 (C-9), 120.8 (C<sub>i</sub> from Ar), 115.4 [q,  $^1J_{CF} = 292.8$  Hz, C(O)CF<sub>3</sub>], 110.0, 100.3 (C-7), 89.1 (C-11), 80.9 (C-10), 78.8 (C-9*a*), 74.4 (q,  $^2J_{CF} = 34.1$  Hz, C-2), 25.3 ppm. <sup>19</sup>F NMR (376.3 MHz, CDCl<sub>3</sub>): δ -72.7 [C(O)CF<sub>3</sub>], -77.2 (CF<sub>3</sub>) ppm.



(2*R*\*,9*aS*\*)-3*l'*: <sup>1</sup>H NMR (400.1 MHz, CDCl<sub>3</sub>): δ 6.57 (pseudo-d, <sup>3</sup>J ~ 4 Hz, 1H, H-9), 6.37 (d, <sup>3</sup>J<sub>6,7</sub> = 7.8 Hz, 1H, H-6), 6.28 (d, <sup>3</sup>J<sub>9*a*,9</sub> = 4.3 Hz, 1H, H-9*a*), 5.88 (dd, <sup>3</sup>J<sub>6,7</sub> = 7.8 Hz, <sup>3</sup>J<sub>7,9</sub> = 1.5 Hz, 1H, H-7), 2.46 (s, 3H, Me) ppm. Other signals are overlapped with those of major isomer. <sup>13</sup>C NMR (100.6 MHz, CDCl<sub>3</sub>): δ 136.6, 132.6, 132.3, 129.4, 128.3, 127.3, 119.9, 98.5, 29.7 ppm. Other signals are overlapped with those of major isomer or can not be seen in the spectrum due to the low concentration of minor isomer. <sup>19</sup>F NMR (376.3 MHz, CDCl<sub>3</sub>): δ -74.7 [C(O)CF<sub>3</sub>], -76.3 (CF<sub>3</sub>) ppm.

**Methyl 4-phenyl-2-(phenylethynyl)-3-(2,2,2-trifluoroacetyl)-2-(trifluoromethyl)-2*H*,9*aH*-pyrido[2,1-*b*][1,3]oxazine-8-carboxylate (3*m*)**. Obtained from pyridine **1e** (0.048 g, 0.35 mmol) and CF<sub>3</sub>-ynone **2a** (0.147 g, 0.74 mmol). Pale yellow powder, m.p. 115.4-116.5 °C (hexane), yield 0.112 g (60%). (2*S*\*,9*aS*\*):(2*R*\*,9*aS*\*)-isomers ratio is 87:13 (<sup>19</sup>F NMR). HRMS (ESI-TOF): m/z [M+H]<sup>+</sup> Calcd for C<sub>27</sub>H<sub>18</sub>F<sub>6</sub>NO<sub>4</sub><sup>+</sup>: 534.1135; found: 534.1140.

(2*S*\*,9*aS*\*)-3*m*: <sup>1</sup>H NMR (400.1 MHz, CDCl<sub>3</sub>): δ 7.66-7.44 (m, 7H), 7.37-7.29 (m, 3H), 6.89 (pseudo-d, <sup>3</sup>J ~ 4 Hz, 1H, H-9), 6.52 (d, <sup>3</sup>J<sub>6,7</sub> = 7.8 Hz, 1H, H-6), 5.99 (dd, <sup>3</sup>J<sub>6,7</sub> = 7.8 Hz, <sup>3</sup>J<sub>7,9</sub> = 1.5 Hz, 1H, H-7), 5.87 (d, <sup>3</sup>J<sub>9*a*,9</sub> = 4.2 Hz, 1H, H-9*a*), 3.85 (s, 3H, Me) ppm. <sup>13</sup>C NMR (100.6 MHz, CDCl<sub>3</sub>): δ 181.0 (q, <sup>2</sup>J<sub>CF</sub> = 35.4 Hz, C-12), 164.6 (C-4), 159.2 (C=O), 133.4, 132.1, 131.2 (q, <sup>1</sup>J<sub>CF</sub> = 1.7 Hz, C-3), 130.1, 129.6 (br s), 129.5 (C-8), 128.3 (C<sub>o,o'</sub> from Ar), 126.5 (C-6), 122.4 (q, <sup>1</sup>J<sub>CF</sub> = 287.3 Hz, CF<sub>3</sub>), 121.5 (C-9), 120.8 (C<sub>i</sub> from Ar), 115.4 (q, <sup>1</sup>J<sub>CF</sub> = 293.0 Hz, C(O)CF<sub>3</sub>), 110.3, 101.5 (C-7), 89.0 (C-11), 80.9 (C-10), 78.8 (C-9*a*), 74.3 (q, <sup>2</sup>J<sub>CF</sub> = 34.8 Hz, C-2), 52.5 ppm. <sup>19</sup>F NMR (376.3 MHz, CDCl<sub>3</sub>): δ -72.7 [C(O)CF<sub>3</sub>], -77.2 (CF<sub>3</sub>) ppm.

(2*R*\*,9*aS*\*)-3*m'*: <sup>1</sup>H NMR (400.1 MHz, CDCl<sub>3</sub>): δ 6.74 (pseudo-d, <sup>3</sup>J ~ 4 Hz, 1H, H-9), 6.35 (d, <sup>3</sup>J<sub>6,7</sub> = 7.8 Hz, 1H, H-6), 6.24 (d, <sup>3</sup>J<sub>9*a*,9</sub> = 4.3 Hz, 1H, H-9*a*), 5.83 (dd, <sup>3</sup>J<sub>6,7</sub> = 7.8 Hz, <sup>3</sup>J<sub>7,9</sub> = 1.5 Hz, 1H, H-7), 3.84 (s, 3H, Me) ppm. Other signals are overlapped with those of major isomer. <sup>13</sup>C NMR (100.6 MHz, CDCl<sub>3</sub>): δ 132.6, 132.3, 130.3, 129.4, 128.3, 127.1, 120.1, 99.8, 52.5 ppm. Other signals are overlapped with those of major isomer or can not be seen in the spectrum due to the low concentration of minor isomer. <sup>19</sup>F NMR (376.3 MHz, CDCl<sub>3</sub>): δ -74.7 [C(O)CF<sub>3</sub>], -76.4 (CF<sub>3</sub>) ppm.

**(2*S*\*,9*aS*\*)-1-(4,6-diPhenyl-2-(phenylethynyl)-2-(trifluoromethyl)-2*H*,9*aH*-pyrido[2,1-*b*][1,3]oxazin-3-yl)-2,2,2-trifluoroethan-1-one (3*n*)**. Obtained from pyridine **1f** (0.079 g, 0.51 mmol) and CF<sub>3</sub>-ynone **2a** (0.204 g, 1.03 mmol). Orange powder, m.p. 90-91 °C (hexane), yield 0.168 g (60%). HRMS (ESI-TOF): m/z [M+H]<sup>+</sup> Calcd for C<sub>31</sub>H<sub>20</sub>F<sub>6</sub>NO<sub>2</sub><sup>+</sup>: 552.1393; found: 552.1393.

(2*S*\*,9*aS*\*)-3*o*: <sup>1</sup>H NMR (400.1 MHz, CDCl<sub>3</sub>): δ 7.46-7.43 (m, 2H), 7.38-7.28 (m, 3H), 7.17-6.99 (m, 5H), 6.93 (br s, 5H), 6.61 (ddd, <sup>3</sup>J<sub>8,9</sub> = 9.7 Hz, <sup>3</sup>J<sub>7,8</sub> = 6.1 Hz, <sup>4</sup>J<sub>8,9*a*</sub> = 0.8 Hz, 1H, H-8), 6.00 (ddd, <sup>3</sup>J<sub>8,9</sub> = 9.7 Hz, <sup>3</sup>J<sub>9*a*,9</sub> = 4.2 Hz, <sup>4</sup>J<sub>7,9</sub> = 0.7 Hz, 1H, H-9), 5.84 (d, <sup>3</sup>J<sub>9*a*,9</sub> = 4.2 Hz, 1H, H-9*a*), 5.43 (dd, <sup>3</sup>J<sub>7,8</sub> = 6.1 Hz, <sup>3</sup>J<sub>7,9</sub> = 0.7 Hz, 1H, H-7) ppm. <sup>13</sup>C NMR (100.6 MHz, CDCl<sub>3</sub>): δ 184.2 (q, <sup>2</sup>J<sub>CF</sub> = 36.1 Hz, C-12), 157.3 (C-4), 139.2, 136.4, 134.7, 133.9, 132.5, 132.1, 131.4, 129.5, 128.9, 128.4, 128.3, 127.8, 127.7, 127.2, 122.8 (q, <sup>1</sup>J<sub>CF</sub> = 285.7 Hz, CF<sub>3</sub>), 120.7, 115.0 [q, <sup>1</sup>J<sub>CF</sub> = 293.6 Hz, C(O)CF<sub>3</sub>], 114.7, 106.7, 89.7 (C-11), 81.5 (C-9*a*), 81.2 (C-10), 74.5 (q, <sup>2</sup>J<sub>CF</sub> = 34.8 Hz, C-2) ppm. <sup>19</sup>F NMR (376.3 MHz, CDCl<sub>3</sub>): δ -73.9 [C(O)CF<sub>3</sub>], -76.0 (CF<sub>3</sub>) ppm.

**1-(9-Bromo-4-phenyl-2-(phenylethynyl)-2-(trifluoromethyl)-2H,9aH-pyrido[2,1-b][1,3]oxazin-3-yl)-2,2,2-trifluoroethan-1-one (3p).** Major (9-Br)-regioisomer, obtained as a

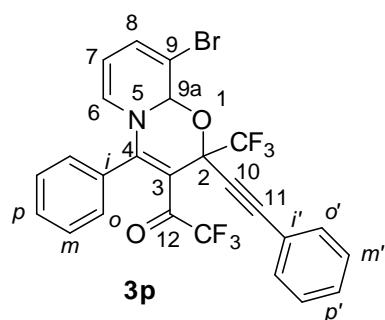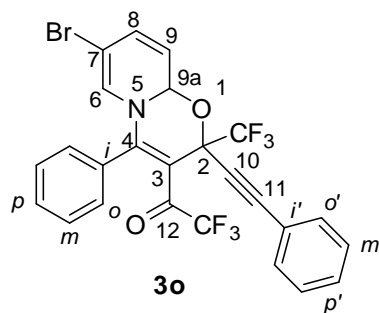

mixture (1:5) with minor (7-Br)-regioisomer (**3o**) from pyridine **1g** (0.082 g, 0.52 mmol) and CF<sub>3</sub>-ynone **2a** (0.208 g, 1.05 mmol). Yellow powder, m.p. 76.0-77.8 °C (hexane), yield 0.153 g (53%). (2*S*\*,9*aS*\*):(2*R*\*,9*aS*\*)-isomers ratio of **3p** is 80:20 (<sup>19</sup>F NMR). HRMS (ESI-TOF) for the

mixture of **3o** and **3p**: m/z [M+H]<sup>+</sup> Calcd for C<sub>25</sub>H<sub>15</sub>F<sub>6</sub>BrNO<sub>2</sub><sup>+</sup>: 554.0185; found: 554.0190.

(2*S*\*,9*aS*\*)-**3p**: <sup>1</sup>H NMR (400.1 MHz, CDCl<sub>3</sub>): δ 7.65-7.30 (m, 10H), 6.80 (d, <sup>3</sup>J<sub>6,7</sub> = 6.6 Hz, 1H, H-6), 6.45 (d, <sup>3</sup>J<sub>7,8</sub> = 7.5 Hz, 1H, H-8), 5.79 (s, 1H, H-9a), 5.38 (pseudo-t, <sup>3</sup>J ~ 7 Hz, 1H, H-7) ppm. <sup>13</sup>C NMR (100.6 MHz, CDCl<sub>3</sub>): δ 181.1 (q, <sup>2</sup>J<sub>CF</sub> = 35.6 Hz, C-12), 158.7 (C-4), 133.4, 132.3, 132.1, 131.1 (q, <sup>3</sup>J<sub>CF</sub> = 1.8 Hz, C-3), 129.6 (br s), 129.4 (C-8), 128.7 (C-6), 128.3, 125.2, 122.4 (q, <sup>1</sup>J<sub>CF</sub> = 286.4 Hz, CF<sub>3</sub>), 121.0 (C<sub>i</sub> from Ar), 117.4 (C-9), 115.4 [q, <sup>1</sup>J<sub>CF</sub> = 292.6 Hz, C(O)CF<sub>3</sub>], 109.9, 103.3 (C-7), 89.2 (C-11), 82.9 (C-10), 80.5 (C-9a), 74.7 (q, <sup>2</sup>J<sub>CF</sub> = 34.8 Hz, C-2) ppm. <sup>19</sup>F NMR (376.3 MHz, CDCl<sub>3</sub>): δ -72.7 [C(O)CF<sub>3</sub>], -76.8 (CF<sub>3</sub>) ppm.

(2*R*\*,9*aS*\*)-**3p'**: <sup>1</sup>H NMR (400.1 MHz, CDCl<sub>3</sub>): δ 6.75 (d, <sup>3</sup>J<sub>6,7</sub> = 6.7 Hz, 1H, H-6), 6.30 (d, <sup>3</sup>J<sub>7,8</sub> = 7.6 Hz, 1H, H-8), 6.16 (s, 1H, H-9a), 5.25 (pseudo-t, <sup>3</sup>J ~ 7 Hz, 1H, H-7) ppm. Other signals are overlapped with those of major isomer. <sup>13</sup>C NMR of (2*R*\*,9*aS*\*)-**3p'** and <sup>13</sup>C NMR of (2*S*\*,9*aS*\*)-**3o** (100.6 MHz, CDCl<sub>3</sub>): δ 158.6 (C-4), 152.3, 133.5, 132.6, 132.2, 130.8, 131.0 (q, <sup>3</sup>J<sub>CF</sub> = 1.3 Hz, C-3), 130.5, 129.5, 129.3, 128.94, 128.91, 128.36, 128.31, 125.7, 121.5, 121.3, 120.8, 110.8, 101.8, 89.02 and 88.98 (C-11), 83.53 and 83.49 (C-10), 81.3 and 80.9 (C-9a), 77.8 ppm. Due to low concentration and equal amounts of (2*R*\*,9*aS*\*)-**3p'** and <sup>13</sup>C NMR of (2*S*\*,9*aS*\*)-**3o** assignment of their signals can not be done. <sup>13</sup>C NMR are reported together. Other signals are overlapped with those of major isomer **3p** or can not be seen in the spectrum due to the low concentration of minor isomers. <sup>19</sup>F NMR (376.3 MHz, CDCl<sub>3</sub>): δ -74.7 [C(O)CF<sub>3</sub>], -75.9 (CF<sub>3</sub>) ppm.

**1-(7-Bromo-4-phenyl-2-(phenylethynyl)-2-(trifluoromethyl)-2H,9aH-pyrido[2,1-b][1,3]oxazin-3-yl)-2,2,2-trifluoroethan-1-one (3p).** Minor (7-Br)-regioisomer, obtained as a mixture with major (9-Br)-regioisomer (**3q**) (see above). (2*S*\*,9*aS*\*):(2*R*\*,9*aS*\*)-isomers ratio is 78:22 (<sup>19</sup>F NMR). HRMS (ESI-TOF) for the mixture of **3o** and **3p**: m/z [M+H]<sup>+</sup> Calcd for C<sub>25</sub>H<sub>15</sub>F<sub>6</sub>BrNO<sub>2</sub><sup>+</sup>: 554.0185; found: 554.0190.

(2*S*\*,9*aS*\*)-**3o**: <sup>1</sup>H NMR (400.1 MHz, CDCl<sub>3</sub>): δ 6.65 (s, 1H, H-6), 6.55 (d, <sup>3</sup>J<sub>8,9</sub> = 10.1 Hz, 1H, H-8), 5.98 (dd, <sup>3</sup>J<sub>8,9</sub> = 10.1 Hz, <sup>3</sup>J<sub>9a,9</sub> = 3.9 Hz, 1H, H-9), 5.71 (d, <sup>3</sup>J<sub>9,9a</sub> = 3.9 Hz, 1H, H-9a) ppm. Other signals are overlapped with those of major isomer. <sup>13</sup>C NMR (100.6 MHz, CDCl<sub>3</sub>): See above in **3p** section. <sup>19</sup>F NMR (376.3 MHz, CDCl<sub>3</sub>): δ -72.7 [C(O)CF<sub>3</sub>], -77.1 (CF<sub>3</sub>) ppm.

(2*R*\*,9*aS*\*)-**3o'**: <sup>1</sup>H NMR (400.1 MHz, CDCl<sub>3</sub>): δ 6.62 (s, 1H, H-6), 6.40 (d, <sup>3</sup>J<sub>8,9</sub> = 10.1 Hz, 1H, H-8), 5.84 (dd, <sup>3</sup>J<sub>8,9</sub> = 10.1 Hz, <sup>3</sup>J<sub>9a,9</sub> = 4.2 Hz, 1H, H-9), 6.06 (d, <sup>3</sup>J<sub>9,9a</sub> = 4.2 Hz, 1H, H-9a) ppm. Other signals are overlapped with those of major isomer. <sup>13</sup>C NMR (100.6 MHz, CDCl<sub>3</sub>): can not be seen in the spectrum due to the low concentration of minor isomer. <sup>19</sup>F NMR (376.3 MHz, CDCl<sub>3</sub>): δ -74.7 [C(O)CF<sub>3</sub>], -75.6 (CF<sub>3</sub>) ppm.

**1-(7-Acetyl-4-phenyl-2-(phenylethynyl)-2-(trifluoromethyl)-2H,9aH-pyrido[2,1-b][1,3]oxazin-3-yl)-2,2,2-trifluoroethan-1-one (3q).** Major (7-Ac)-regioisomer, obtained as a

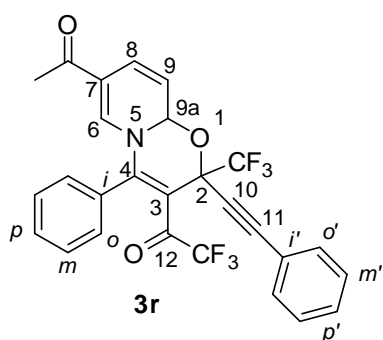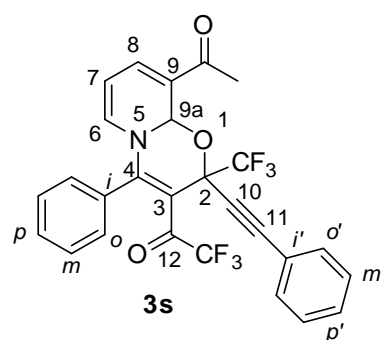

mixture (2:1) with minor (9-Ac)-regioisomer (**3r**) from pyridine **1h** (0.065 g, 0.54 mmol) and CF<sub>3</sub>-ynone **2a** (0.214 g, 1.08 mmol). Yellow powder, m.p. 114.4-115.3 °C (hexane), yield 0.224 g (80%). (2*S*\*,9*aS*\*):(2*R*\*,9*aS*\*)-isomers ratio is 83:17 (<sup>1</sup>H NMR).

HRMS (ESI-TOF) for the mixture of **3q** and **3r**: m/z [M+H]<sup>+</sup> Calcd for C<sub>27</sub>H<sub>18</sub>F<sub>6</sub>NO<sub>3</sub><sup>+</sup>: 518.1185; found: 518.1196.

(2*S*\*,9*aS*\*)-**3q**: <sup>1</sup>H NMR (400.1 MHz, CDCl<sub>3</sub>): δ 7.69-7.29 (m, 11H), 7.10 (d, <sup>3</sup>J<sub>8,9</sub> = 10.1 Hz, 1H, H-8), 6.00 (dd, <sup>3</sup>J<sub>8,9</sub> = 10.1 Hz, <sup>3</sup>J<sub>9a,9</sub> = 3.6 Hz, 1H, H-9), 5.88 (d, <sup>3</sup>J<sub>9a,9</sub> = 3.6 Hz, 1H, H-9a), 2.12 (s, 3H, Me) ppm. <sup>13</sup>C NMR (100.6 MHz, CDCl<sub>3</sub>): δ 193.1, 182.1 (q, <sup>2</sup>J<sub>CF</sub> = 36.3 Hz, C-12), 156.2 (C-4), 133.7, 133.6, 132.1, 129.9, 129.7, 128.4 (C-8), 130.4 (q, <sup>3</sup>J<sub>CF</sub> = 1.3 Hz, C-3), 124.2 (C-6), 122.2 (q, <sup>1</sup>J<sub>CF</sub> = 286.0 Hz, CF<sub>3</sub>), 120.4 (C<sub>i</sub> from Ar), 115.3 (C-9), 115.0 (q, <sup>1</sup>J<sub>CF</sub> = 293.0 Hz, C(O)CF<sub>3</sub>), 102.3, 90.1 (C-11), 80.3 (C-10), 79.1 (C-9a), 74.2 (q, <sup>2</sup>J<sub>CF</sub> = 34.8 Hz, C-2), 25.0 ppm. <sup>19</sup>F NMR (376.3 MHz, CDCl<sub>3</sub>): δ -73.7 [C(O)CF<sub>3</sub>], -76.8 (CF<sub>3</sub>) ppm.

(2*R*\*,9*aS*\*)-**3q'**: <sup>1</sup>H NMR (400.1 MHz, CDCl<sub>3</sub>): δ 7.17 (s, 1H, H-6), 7.05 (d, <sup>3</sup>J<sub>8,9</sub> = 10.2 Hz, 1H, H-8), 6.17 (d, <sup>3</sup>J<sub>9a,9</sub> = 3.6 Hz, 1H, H-9a), 5.90 (dd, <sup>3</sup>J<sub>8,9</sub> = 10.2 Hz, <sup>3</sup>J<sub>9a,9</sub> = 3.6 Hz, 1H, H-9), 2.06 (s, 3H, Me) ppm. <sup>13</sup>C NMR (100.6 MHz, CDCl<sub>3</sub>): δ 193.0, 131.8, 128.3, 114.5, 24.9 ppm. Other signals are overlapped with those of major isomer or can not be seen in the spectrum due to the low concentration of minor isomer. <sup>19</sup>F NMR (376.3 MHz, CDCl<sub>3</sub>): δ -74.9 [C(O)CF<sub>3</sub>], -75.5 (CF<sub>3</sub>) ppm.

**1-(9-Acetyl-4-phenyl-2-(phenylethynyl)-2-(trifluoromethyl)-2H,9aH-pyrido[2,1-b][1,3]oxazin-3-yl)-2,2,2-trifluoroethan-1-one (3r).** Minor (9-Ac)-regioisomer, obtained as a mixture with major (7-Ac)-regioisomer (**3q**) (see above). (2*S*\*,9*aS*\*):(2*R*\*,9*aS*\*)-isomers ratio is 87:13 (<sup>1</sup>H NMR). HRMS (ESI-TOF) for the mixture of **3q** and **3r**: m/z [M+H]<sup>+</sup> Calcd for C<sub>27</sub>H<sub>18</sub>F<sub>6</sub>NO<sub>3</sub><sup>+</sup>: 518.1185; found: 518.1196.

(2*S*\*,9*aS*\*)-**3r**: <sup>1</sup>H NMR (400.1 MHz, CDCl<sub>3</sub>): δ 7.69-7.29 (m, 11H), 6.65 (d, <sup>3</sup>J<sub>6,7</sub> = 7.3 Hz, 1H, H-6), 6.20 (s, 1H, H-9a), 5.62 (pseudo-t, <sup>3</sup>J ~ 7 Hz, 1H, H-7), 2.47 (s, 3H, Me) ppm. <sup>13</sup>C NMR (100.6 MHz, CDCl<sub>3</sub>): δ 194.6, 181.5 (q, <sup>2</sup>J<sub>CF</sub> = 35.8 Hz, C-12), 158.0 (C-4), 134.2, 133.5, 132.1, 131.0 (q, <sup>3</sup>J<sub>CF</sub> = 1.7 Hz, C-3), 129.4, 128.3, (C-8), 124.9 (C-6), 122.3 (q, <sup>1</sup>J<sub>CF</sub> = 286.6 Hz, CF<sub>3</sub>), 120.9 (C<sub>i</sub> from Ar), 115.7 (C-9), 115.2 (q, <sup>1</sup>J<sub>CF</sub> = 293.0 Hz, C(O)CF<sub>3</sub>), 89.6 (C-11), 80.0 (C-10), 77.7 (C-9a), 74.4 (q, <sup>2</sup>J<sub>CF</sub> = 34.5 Hz, C-2), 25.7 ppm. <sup>19</sup>F NMR (376.3 MHz, CDCl<sub>3</sub>): δ -73.0 [C(O)CF<sub>3</sub>], -76.8 (CF<sub>3</sub>) ppm.

(2*R*\*,9*aS*\*)-**3r'**: <sup>1</sup>H NMR (400.1 MHz, CDCl<sub>3</sub>): δ 6.58 (s, 1H, H-9a), 6.51 (d, <sup>3</sup>J<sub>6,7</sub> = 7.4 Hz, 1H, H-6), 5.62 (pseudo-t, <sup>3</sup>J ~ 7 Hz, 1H, H-7), 2.43 (s, 3H, Me) ppm. Other signals are overlapped with those of major isomer. <sup>13</sup>C NMR (100.6 MHz, CDCl<sub>3</sub>): δ 194.7, 134.3, 133.0, 132.2, 129.5, 114.9, 25.5 ppm. Other signals are overlapped with those of major isomer or can not be seen in the spectrum due to the low concentration of minor isomer. <sup>19</sup>F NMR (376.3 MHz, CDCl<sub>3</sub>): δ -74.9 [C(O)CF<sub>3</sub>], -76.4 (CF<sub>3</sub>) ppm

**4-Phenyl-2-(phenylethynyl)-3-(2,2,2-trifluoroacetyl)-2-(trifluoromethyl)-2H,9aH-pyrido[2,1-b][1,3]oxazine-7-carbonitrile (3s).** Major (7-CN)-regioisomer, obtained as a mixture

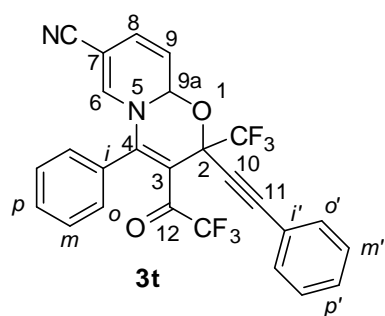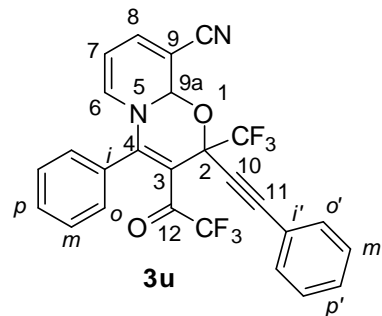

(2.5:1) with minor (9-CN)-regioisomer (**3t**) from pyridine **1i** (0.054 g, 0.5 mmol) and CF<sub>3</sub>-ynone **2a** (0.208 g, 1.05 mmol). Yellow powder, m.p. 95-96 °C (hexane), yield 0.165 g (66%). (2*S*\*,9*aS*\*):(2*R*\*,9*aS*\*)-isomers

ratio is 76:24 (<sup>19</sup>F NMR). HRMS (ESI-TOF) for the mixture of **3s** and **3t**: m/z [M+H]<sup>+</sup> Calcd for C<sub>26</sub>H<sub>15</sub>F<sub>6</sub>N<sub>2</sub>O<sub>2</sub><sup>+</sup>: 501.1032; found: 501.1055.

(2*S*\*,9*aS*\*)-**3s**: <sup>1</sup>H NMR (400.1 MHz, CDCl<sub>3</sub>): δ 7.69-7.28 (m, 10H), 6.98 (s, 1H, H-6), 6.49 (d, <sup>3</sup>J<sub>8,9</sub> = 10.0 Hz, 1H, H-8), 6.00 (dd, <sup>3</sup>J<sub>8,9</sub> = 10.0 Hz, <sup>3</sup>J<sub>9a,9</sub> = 3.5 Hz, 1H, H-9), 5.92-5.89 (m, 1H, H-9a) ppm. <sup>13</sup>C NMR (100.6 MHz, CDCl<sub>3</sub>): δ 182.0 (q, <sup>2</sup>J<sub>CF</sub> = 37.0 Hz, C-12), 154.5 (C-4), 136.0, 133.7, 132.0, 130.0, 129.9, 128.4, 130.3 (q, <sup>4</sup>J<sub>CF</sub> = 1.7 Hz, C-3), 124.4 (C-6), 122.1 (q, <sup>1</sup>J<sub>CF</sub> = 286.4 Hz, CF<sub>3</sub>), 120.2 (C<sub>i</sub> from Ar), 116.3 (C-9), 114.9 [q, <sup>1</sup>J<sub>CF</sub> = 293.0 Hz, C(O)CF<sub>3</sub>], 113.3 (CN), 101.4, 88.5 (C-11), 79.9 (C-10), 78.3 (C-9a), 74.3 (q, <sup>2</sup>J<sub>CF</sub> = 34.7 Hz, C-2) ppm. <sup>19</sup>F NMR (376.3 MHz, CDCl<sub>3</sub>): δ -73.9 [C(O)CF<sub>3</sub>], -76.8 (CF<sub>3</sub>) ppm.

(2*R*\*,9*aS*\*)-**3s'**: <sup>1</sup>H NMR (400.1 MHz, CDCl<sub>3</sub>): δ 6.87 (s, 1H, H-6), 6.44 (d, <sup>3</sup>J<sub>8,9</sub> = 10.0 Hz, 1H, H-8), 6.20 (d, <sup>3</sup>J<sub>9a,9</sub> = 3.6 Hz, 1H, H-9a) ppm. <sup>13</sup>C NMR (100.6 MHz, CDCl<sub>3</sub>): δ 149.8, 136.5, 133.1, 132.2, 120.8, 115.6, 112.4 (CN), 100.3, 86.8, 80.1, 78.8 (q, <sup>4</sup>J<sub>CF</sub> = 3.7 Hz, C-10), 72.1 (q, <sup>2</sup>J<sub>CF</sub> = 32.4 Hz, C-2) ppm. Other signals are overlapped with those of major isomer or can not be seen in the spectrum due to the low concentration of minor isomer. <sup>19</sup>F NMR (376.3 MHz, CDCl<sub>3</sub>): δ -75.0 [C(O)CF<sub>3</sub>], -76.5 (CF<sub>3</sub>) ppm.

**4-Phenyl-2-(phenylethynyl)-3-(2,2,2-trifluoroacetyl)-2-(trifluoromethyl)-2H,9aH-pyrido[2,1-b][1,3]oxazine-7-carbonitrile (3t).** Minor (9-CN)-regioisomer, obtained as a mixture with major (7-CN)-regioisomer (**3s**) (see above). (2*S*\*,9*aS*\*):(2*R*\*,9*aS*\*)-isomers ratio is 86:14 (<sup>19</sup>F NMR). HRMS (ESI-TOF) for the mixture of **3s** and **3t**: m/z [M+H]<sup>+</sup> Calcd for C<sub>26</sub>H<sub>15</sub>F<sub>6</sub>N<sub>2</sub>O<sub>2</sub><sup>+</sup>: 501.1032; found: 501.1055.

(2*S*\*,9*aS*\*)-**3t**: <sup>1</sup>H NMR (400.1 MHz, CDCl<sub>3</sub>): δ 7.69-7.28 (m, 10H), 7.14 (d, <sup>3</sup>J<sub>7,8</sub> = 6.5 Hz, 1H, H-8), 6.64 (d, <sup>3</sup>J<sub>6,7</sub> = 7.5 Hz, 1H, H-6), 5.92-5.89 (m, 1H, H-9a), 5.54 (pseudo-t, <sup>3</sup>J ~ 7 Hz, 1H, H-7) ppm. <sup>13</sup>C NMR (100.6 MHz, CDCl<sub>3</sub>): δ 182.5 (q, <sup>2</sup>J<sub>CF</sub> = 37.2 Hz, C-12), 156.4 (C-4), 139.3, 133.6, 132.1, 131.3, 129.7, 129.6, 129.3, 128.3, 124.3 (C-6), 122.1 (q, <sup>1</sup>J<sub>CF</sub> = 286.6 Hz, CF<sub>3</sub>), 120.4 (C<sub>i</sub> from Ar), 117.2 (C-9), 115.1 [q, <sup>1</sup>J<sub>CF</sub> = 293.2 Hz, C(O)CF<sub>3</sub>], 112.5 (CN), 98.7, 90.7 (C-11), 87.7, 79.8 (C-10), 78.2 (C-9a), 74.5 (q, <sup>2</sup>J<sub>CF</sub> = 35.6 Hz, C-2) ppm. <sup>19</sup>F NMR (376.3 MHz, CDCl<sub>3</sub>): δ -73.5 [C(O)CF<sub>3</sub>], -76.8 (CF<sub>3</sub>) ppm.

(2*R*\*,9*aS*\*)-**3t'**: <sup>1</sup>H NMR (400.1 MHz, CDCl<sub>3</sub>): δ 7.09 (d, <sup>3</sup>J<sub>7,8</sub> = 6.4 Hz, 1H, H-8), 6.23 (s, 1H, H-9a), ppm. Other signals are overlapped with those of major isomer. <sup>13</sup>C NMR (100.6 MHz, CDCl<sub>3</sub>): δ 149.5, 132.9, 132.7, 97.8, 86.3, 90.4. Other signals are overlapped with those of major isomer or can not be seen in the spectrum due to the low concentration of minor isomer. <sup>19</sup>F NMR (376.3 MHz, CDCl<sub>3</sub>): δ -74.9 [C(O)CF<sub>3</sub>], -76.5 (CF<sub>3</sub>) ppm

|           |          |                |                                                                |
|-----------|----------|----------------|----------------------------------------------------------------|
| <b>FW</b> | 475.3826 | <b>Formula</b> | C <sub>25</sub> H <sub>15</sub> F <sub>6</sub> NO <sub>2</sub> |
|-----------|----------|----------------|----------------------------------------------------------------|

|                               |                                    |                               |                      |                       |             |                             |              |
|-------------------------------|------------------------------------|-------------------------------|----------------------|-----------------------|-------------|-----------------------------|--------------|
| <b>Acquisition Time (sec)</b> | 2.9295                             | <b>Comment</b>                | Imported from UXNMR. |                       | <b>Date</b> | 14 Apr 2018 22:33:46        |              |
| <b>File Name</b>              | C:\BM_DATA\BM-1344\BM-1344_001001r | <b>Frequency (MHz)</b>        | 400.13               | <b>Nucleus</b>        | 1H          | <b>Number of Transients</b> | 8            |
| <b>Original Points Count</b>  | 16384                              | <b>Points Count</b>           | 65536                | <b>Pulse Sequence</b> | zg30        | <b>Solvent</b>              | CHLOROFORM-D |
| <b>Sweep Width (Hz)</b>       | 5592.84                            | <b>Temperature (degree C)</b> | 27.000               |                       |             |                             |              |

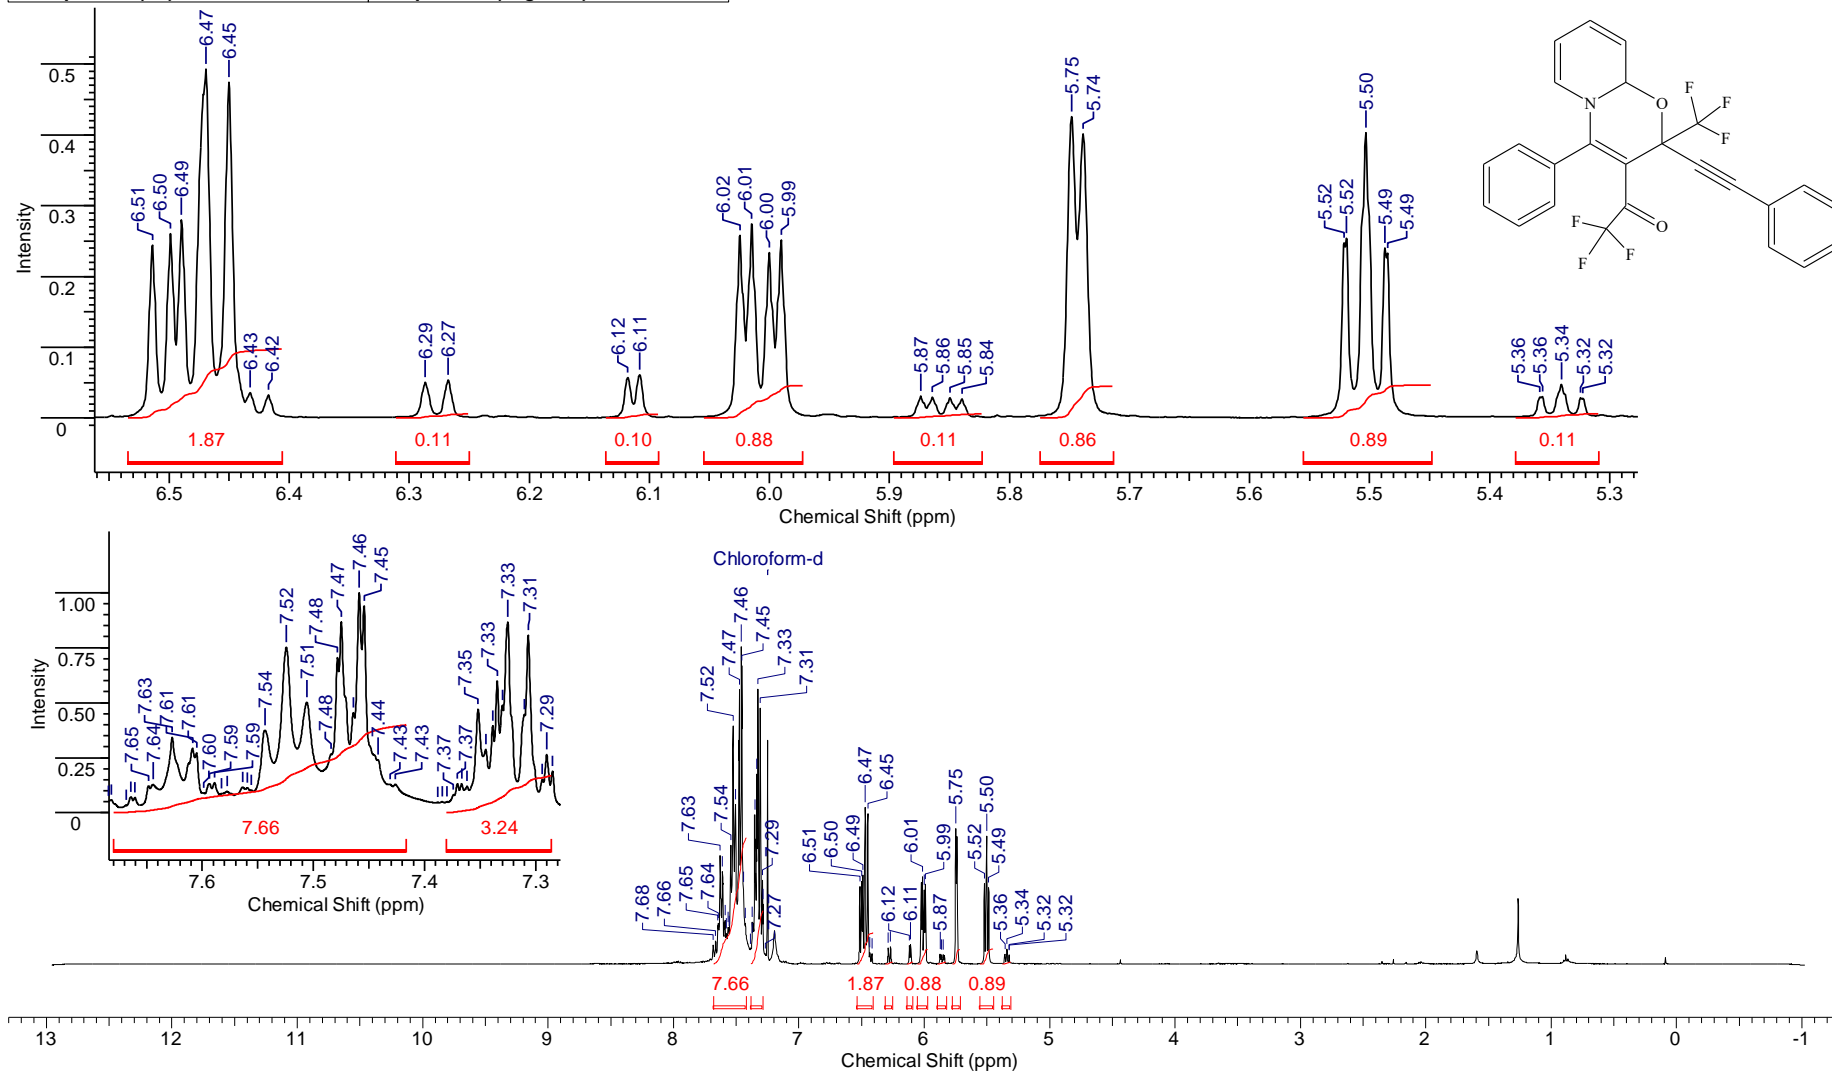

<sup>1</sup>H NMR spectrum of **3a** (400.1 MHz, CDCl<sub>3</sub>)

|           |          |                |                                                                |
|-----------|----------|----------------|----------------------------------------------------------------|
| <b>FW</b> | 475.3826 | <b>Formula</b> | C <sub>25</sub> H <sub>15</sub> F <sub>6</sub> NO <sub>2</sub> |
|-----------|----------|----------------|----------------------------------------------------------------|

|                               |                                    |                               |                      |                       |             |                             |              |
|-------------------------------|------------------------------------|-------------------------------|----------------------|-----------------------|-------------|-----------------------------|--------------|
| <b>Acquisition Time (sec)</b> | 0.6783                             | <b>Comment</b>                | Imported from UXNMR. |                       | <b>Date</b> | 14 Apr 2018 22:39:56        |              |
| <b>File Name</b>              | C:\BM_DATA\BM-1344\BM-1344_002001r | <b>Frequency (MHz)</b>        | 100.61               | <b>Nucleus</b>        | 13C         | <b>Number of Transients</b> | 128          |
| <b>Original Points Count</b>  | 16384                              | <b>Points Count</b>           | 131072               | <b>Pulse Sequence</b> | zgpg30      | <b>Solvent</b>              | CHLOROFORM-D |
| <b>Sweep Width (Hz)</b>       | 24154.59                           | <b>Temperature (degree C)</b> | 27.000               |                       |             |                             |              |

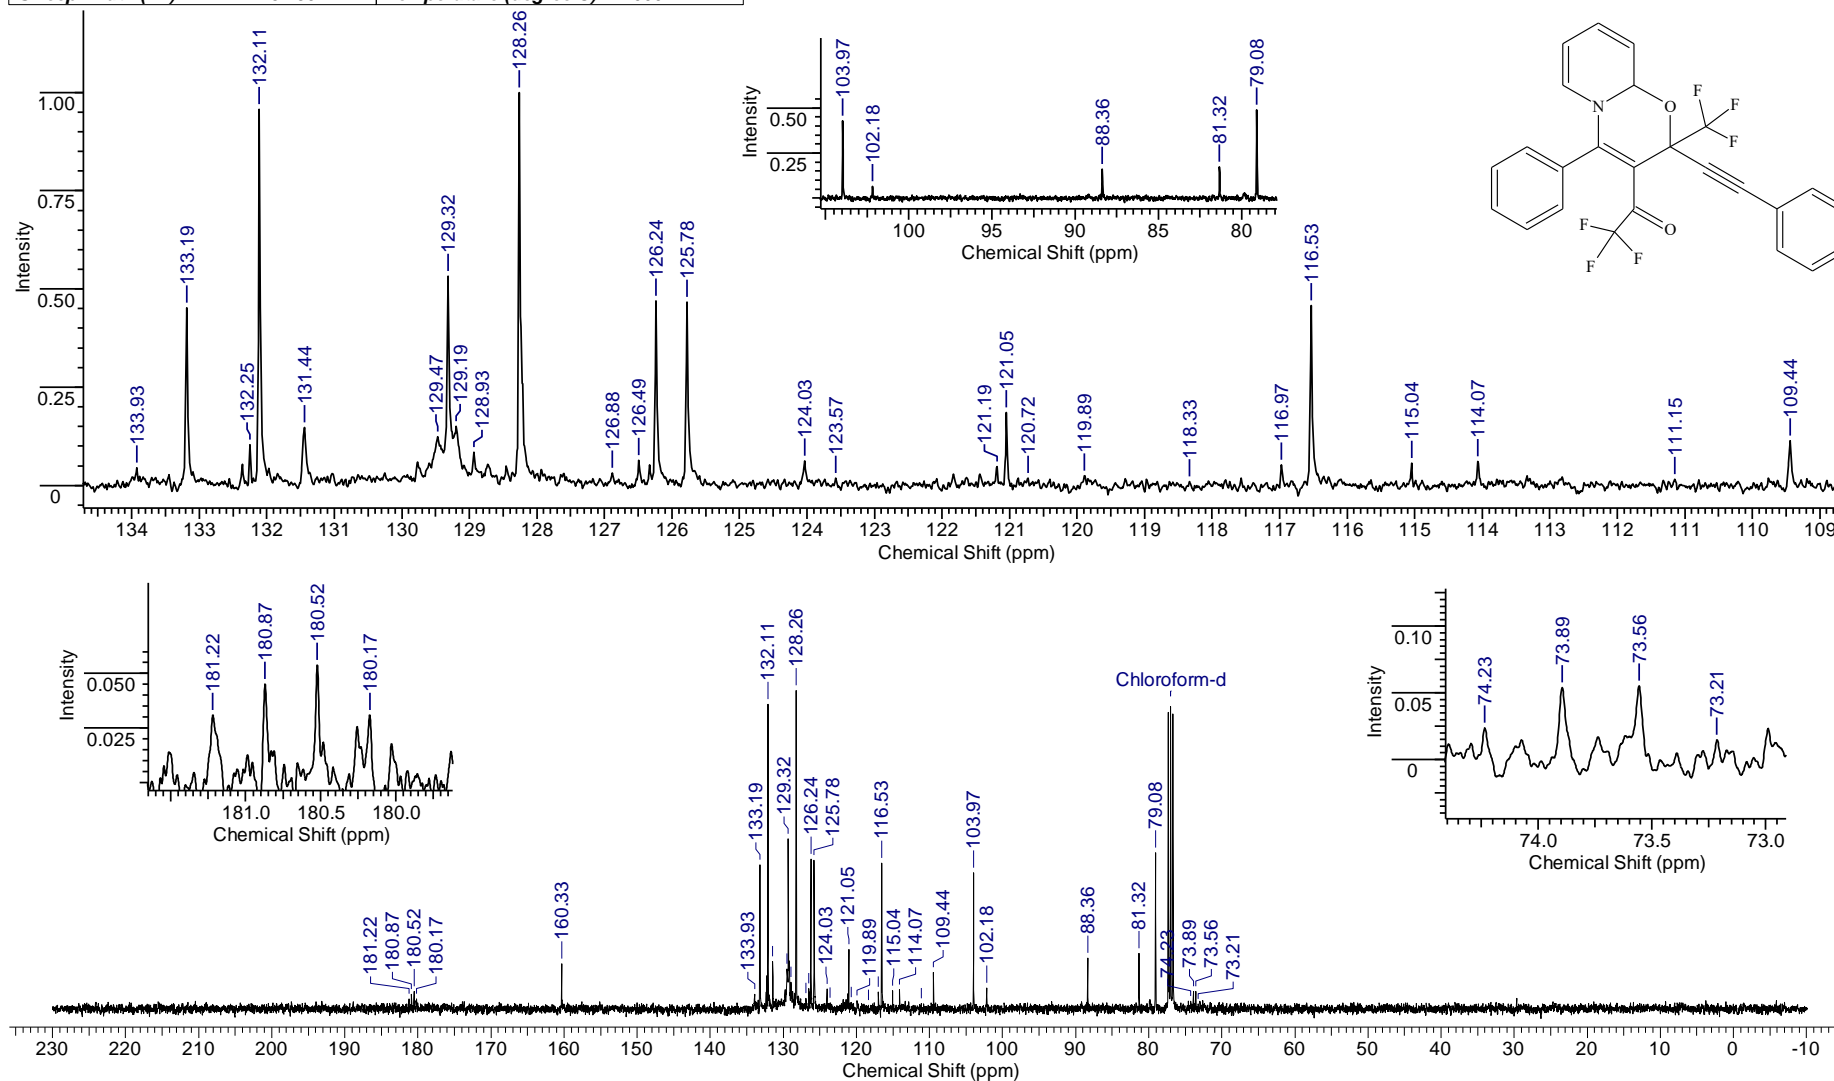

<sup>13</sup>C NMR spectrum of **3a** (100.6 MHz, CDCl<sub>3</sub>)

FW 475.3826 Formula C<sub>25</sub>H<sub>15</sub>F<sub>6</sub>NO<sub>2</sub>

|                        |          |                        |             |                      |                                                           |                             |
|------------------------|----------|------------------------|-------------|----------------------|-----------------------------------------------------------|-----------------------------|
| Acquisition Time (sec) | 0.7340   | Date                   | Apr 13 2018 | File Name            | I:\SPEC_BM_F_2018.04.27\BM-1344-R_20180413_01\FLUORINE_01 |                             |
| Frequency (MHz)        | 376.31   | Nucleus                | 19F         | Number of Transients | 16                                                        | Original Points Count 65536 |
| Points Count           | 65536    | Pulse Sequence         | s2pul       | Solvent              | CHLOROFORM-D                                              |                             |
| Sweep Width (Hz)       | 89285.71 | Temperature (degree C) | 22.000      |                      |                                                           |                             |

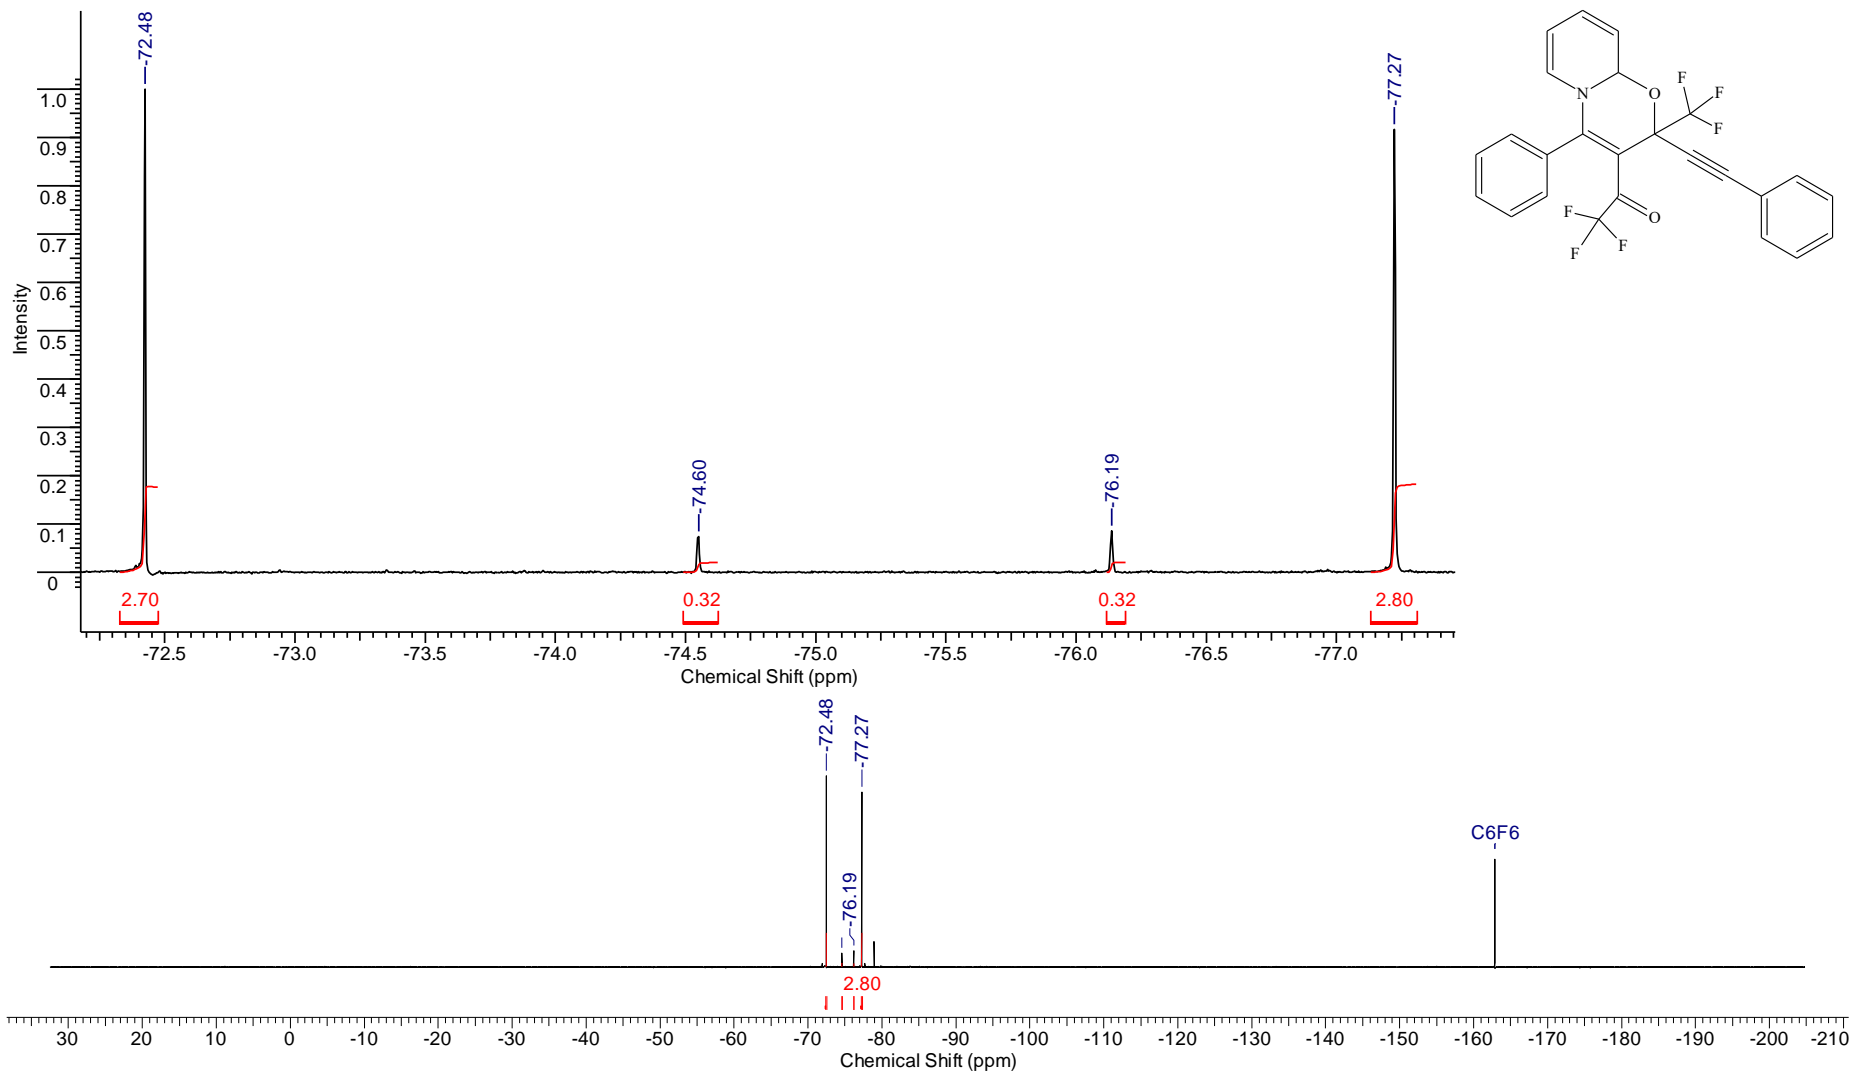

|           |          |                |                                                                |
|-----------|----------|----------------|----------------------------------------------------------------|
| <b>FW</b> | 587.5952 | <b>Formula</b> | C <sub>33</sub> H <sub>31</sub> F <sub>6</sub> NO <sub>2</sub> |
|-----------|----------|----------------|----------------------------------------------------------------|

|                               |                                                  |                               |                      |                               |                      |
|-------------------------------|--------------------------------------------------|-------------------------------|----------------------|-------------------------------|----------------------|
| <b>Acquisition Time (sec)</b> | 4.0894                                           | <b>Comment</b>                | Imported from UXNMR. | <b>Date</b>                   | 10 Nov 2018 13:08:10 |
| <b>File Name</b>              | C:\DOCS\BM\SPEC_H_C_I-XII.2018\BM-1430-C_001001r | <b>Frequency (MHz)</b>        | 400.13               | <b>Nucleus</b>                | 1H                   |
| <b>Number of Transients</b>   | 8                                                | <b>Original Points Count</b>  | 32768                | <b>Points Count</b>           | 131072               |
| <b>Solvent</b>                | CHLOROFORM-D                                     | <b>Sweep Width (Hz)</b>       | 8012.82              | <b>Pulse Sequence</b>         | zg30                 |
|                               |                                                  | <b>Temperature (degree C)</b> |                      | <b>Temperature (degree C)</b> | 27.000               |

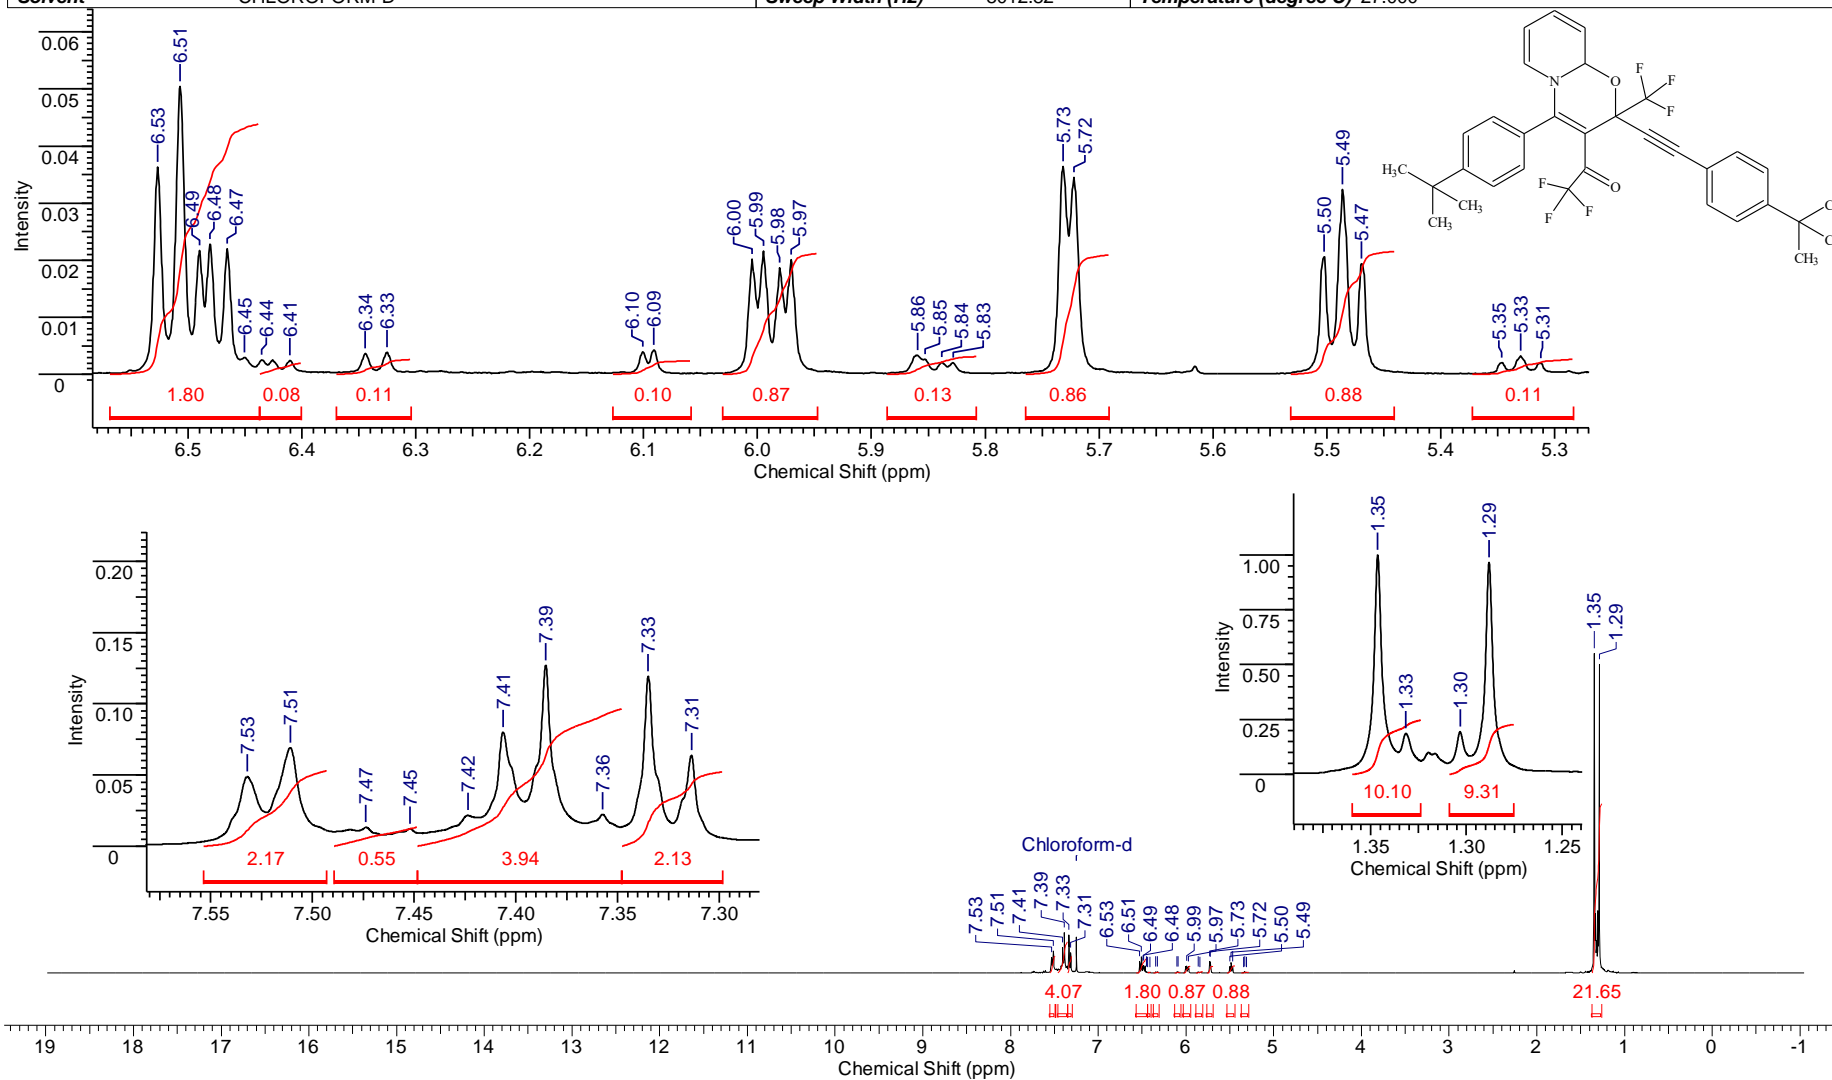

<sup>1</sup>H NMR spectrum of **3b** (400.1 MHz, CDCl<sub>3</sub>)



|    |          |         |                                                                |
|----|----------|---------|----------------------------------------------------------------|
| FW | 587.5952 | Formula | C <sub>33</sub> H <sub>31</sub> F <sub>6</sub> NO <sub>2</sub> |
|----|----------|---------|----------------------------------------------------------------|

|                        |                                                  |                       |                      |                        |                      |
|------------------------|--------------------------------------------------|-----------------------|----------------------|------------------------|----------------------|
| Acquisition Time (sec) | 0.6783                                           | Comment               | Imported from UXMNR. | Date                   | 10 Nov 2018 13:23:28 |
| File Name              | C:\DOCS\BM\SPEC_H.C I-XII.2018\BM-1430-C_002001r | Frequency (MHz)       | 100.61               | Nucleus                | 13C                  |
| Number of Transients   | 368                                              | Original Points Count | 16384                | Points Count           | 131072               |
| Solvent                | CHLOROFORM-D                                     | Sweep Width (Hz)      | 24154.59             | Pulse Sequence         | zgpg30               |
|                        |                                                  |                       |                      | Temperature (degree C) | 27.000               |

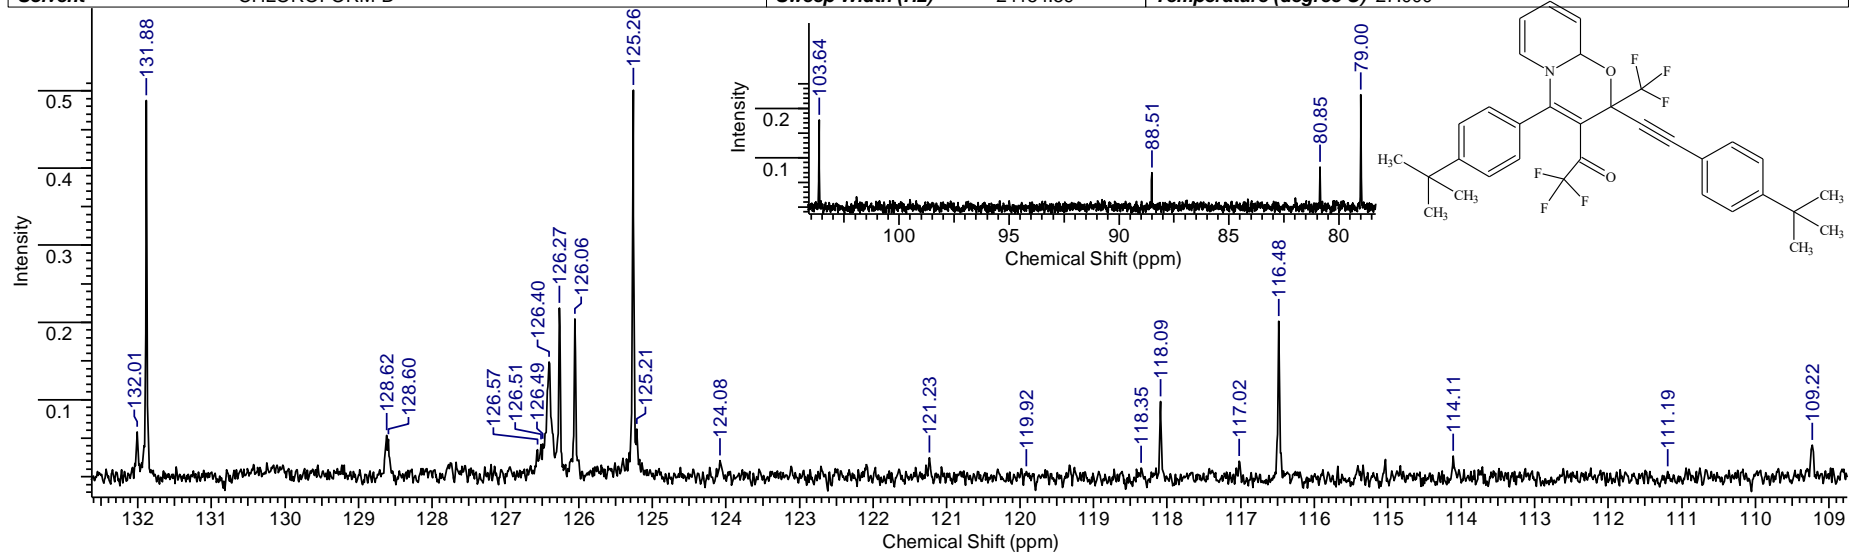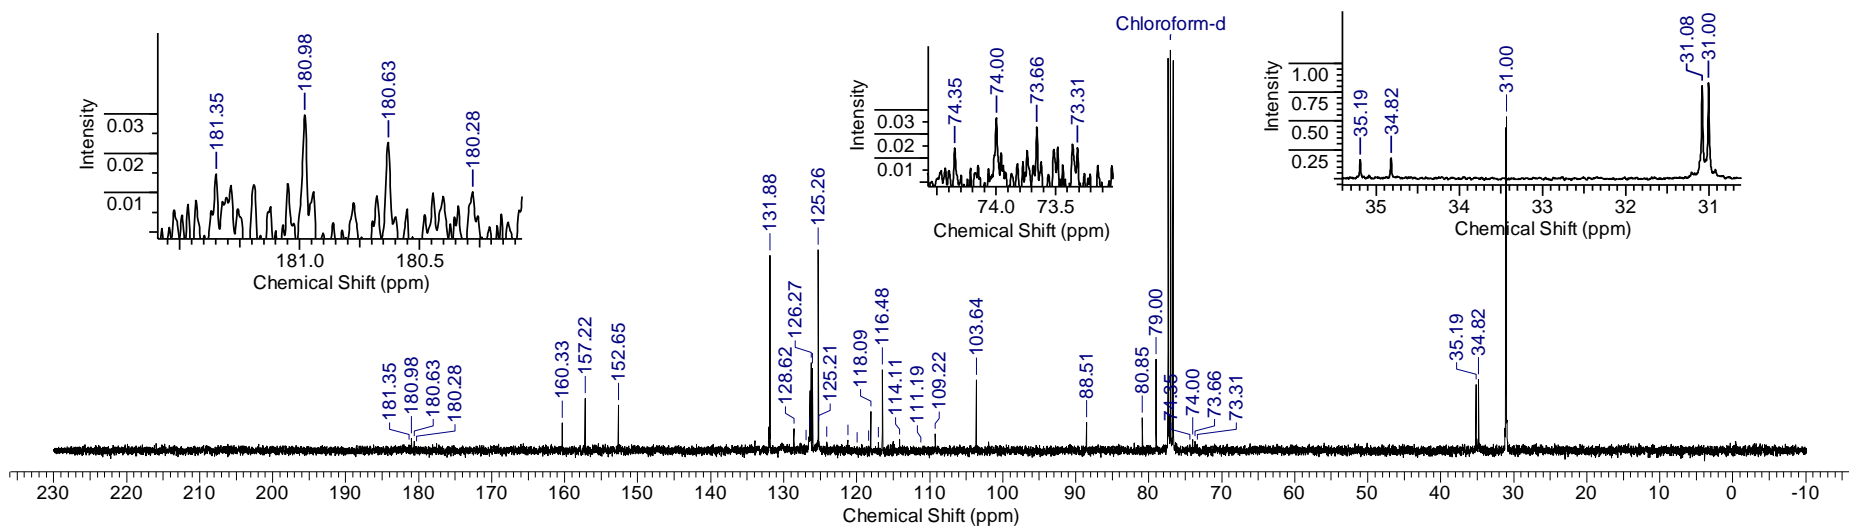

<sup>13</sup>C NMR spectrum of **3b** (100.6 MHz, CDCl<sub>3</sub>)

|                        |          |                        |             |                      |                                                                   |                       |        |
|------------------------|----------|------------------------|-------------|----------------------|-------------------------------------------------------------------|-----------------------|--------|
| Acquisition Time (sec) | 2.0000   | Date                   | Nov 12 2018 | File Name            | C:\DOCS\BM\SPEC_BM_F_2018.12.25\BM-1430-C_20181112_01\FLUORINE_01 |                       |        |
| Frequency (MHz)        | 376.31   | Nucleus                | 19F         | Number of Transients | 16                                                                | Original Points Count | 178571 |
| Points Count           | 262144   | Pulse Sequence         | s2pul       | Solvent              | CHLOROFORM-D                                                      |                       |        |
| Sweep Width (Hz)       | 89285.71 | Temperature (degree C) | 22.000      |                      |                                                                   |                       |        |

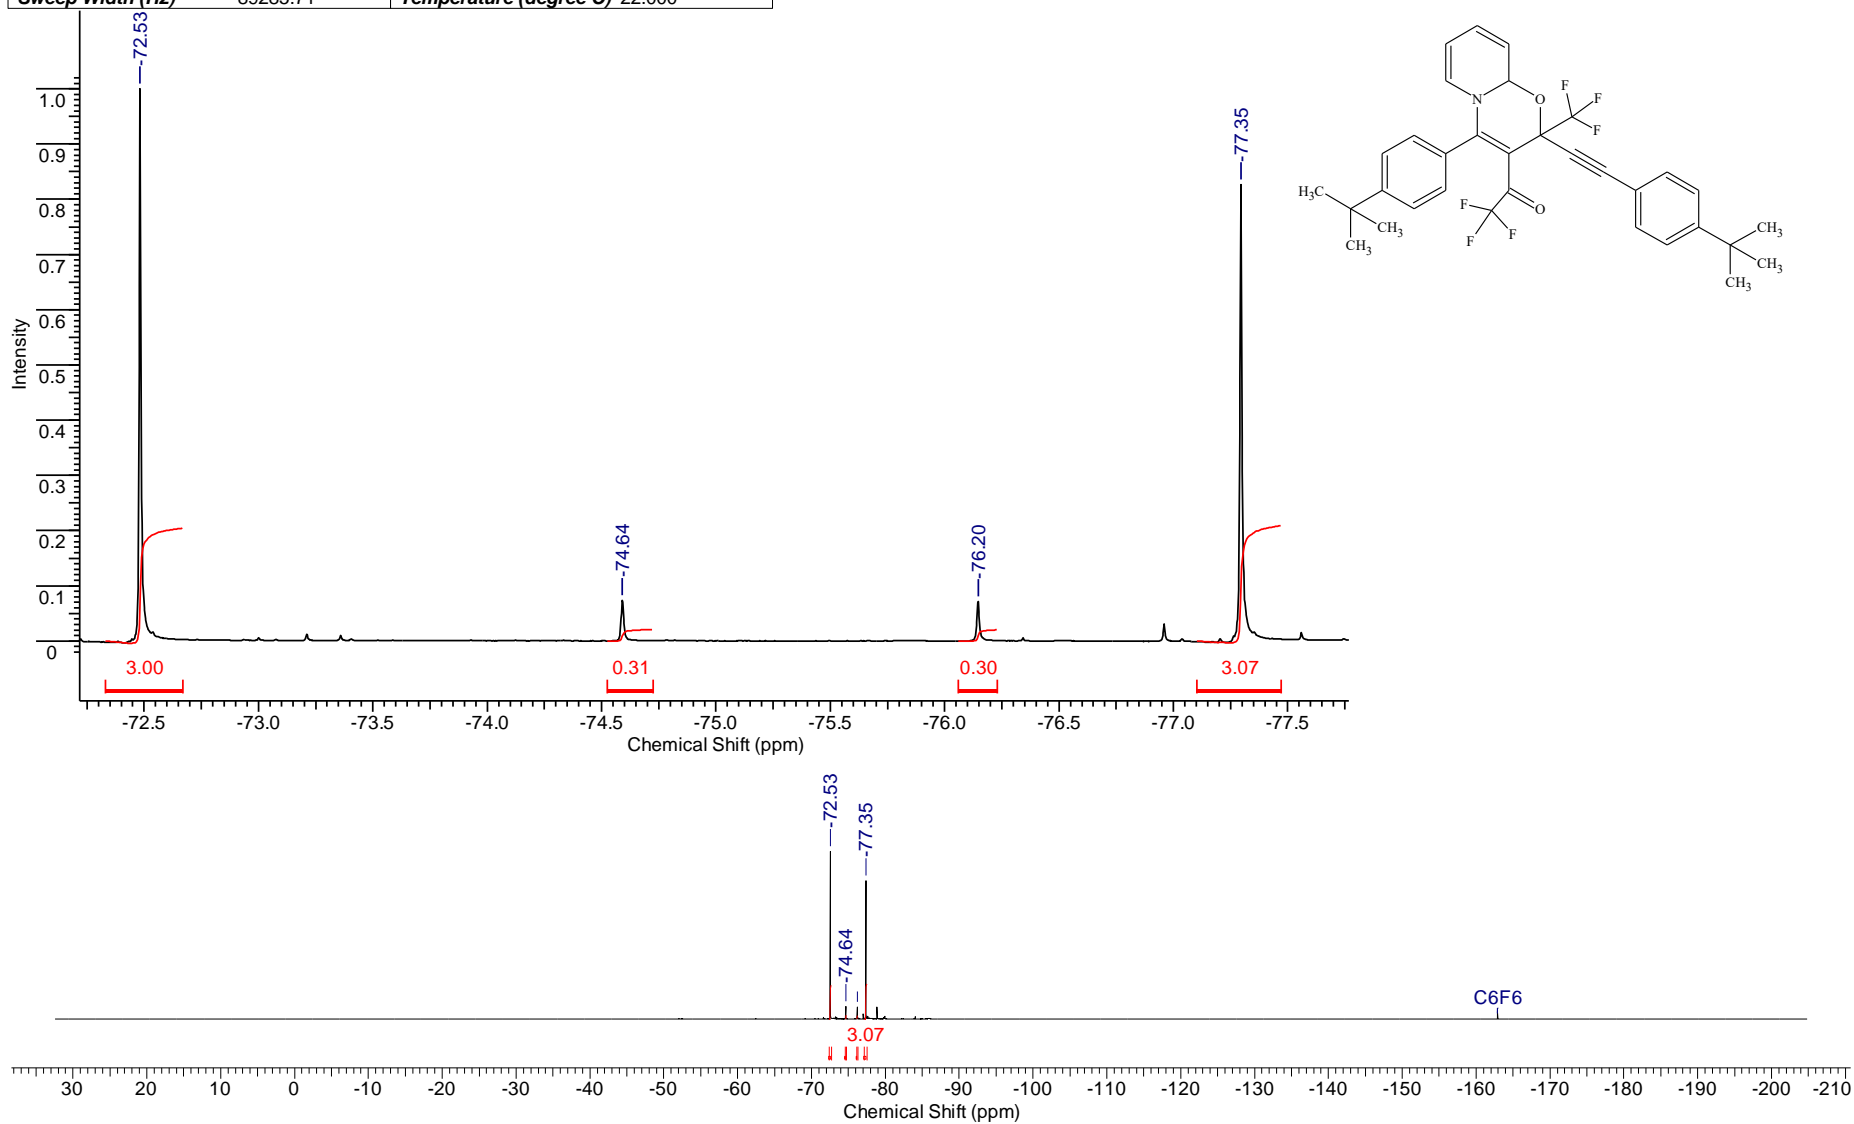

|                               |                                                    |                              |                      |                         |                      |
|-------------------------------|----------------------------------------------------|------------------------------|----------------------|-------------------------|----------------------|
| <b>Acquisition Time (sec)</b> | 4.0894                                             | <b>Comment</b>               | Imported from UXMNR. | <b>Date</b>             | 30 Oct 2018 16:01:54 |
| <b>File Name</b>              | C:\DOCS\OUTPUT_301\2018\10.10\áá\BM-1417.H_001001r | <b>Number of Transients</b>  | 6                    | <b>Frequency (MHz)</b>  | 400.13               |
| <b>Nucleus</b>                | 1H                                                 | <b>Original Points Count</b> | 32768                | <b>Points Count</b>     | 131072               |
| <b>Pulse Sequence</b>         | zg30                                               | <b>Solvent</b>               | CHLOROFORM-D         | <b>Sweep Width (Hz)</b> | 8012.82              |
| <b>Temperature (degree C)</b> | 27.000                                             |                              |                      |                         |                      |

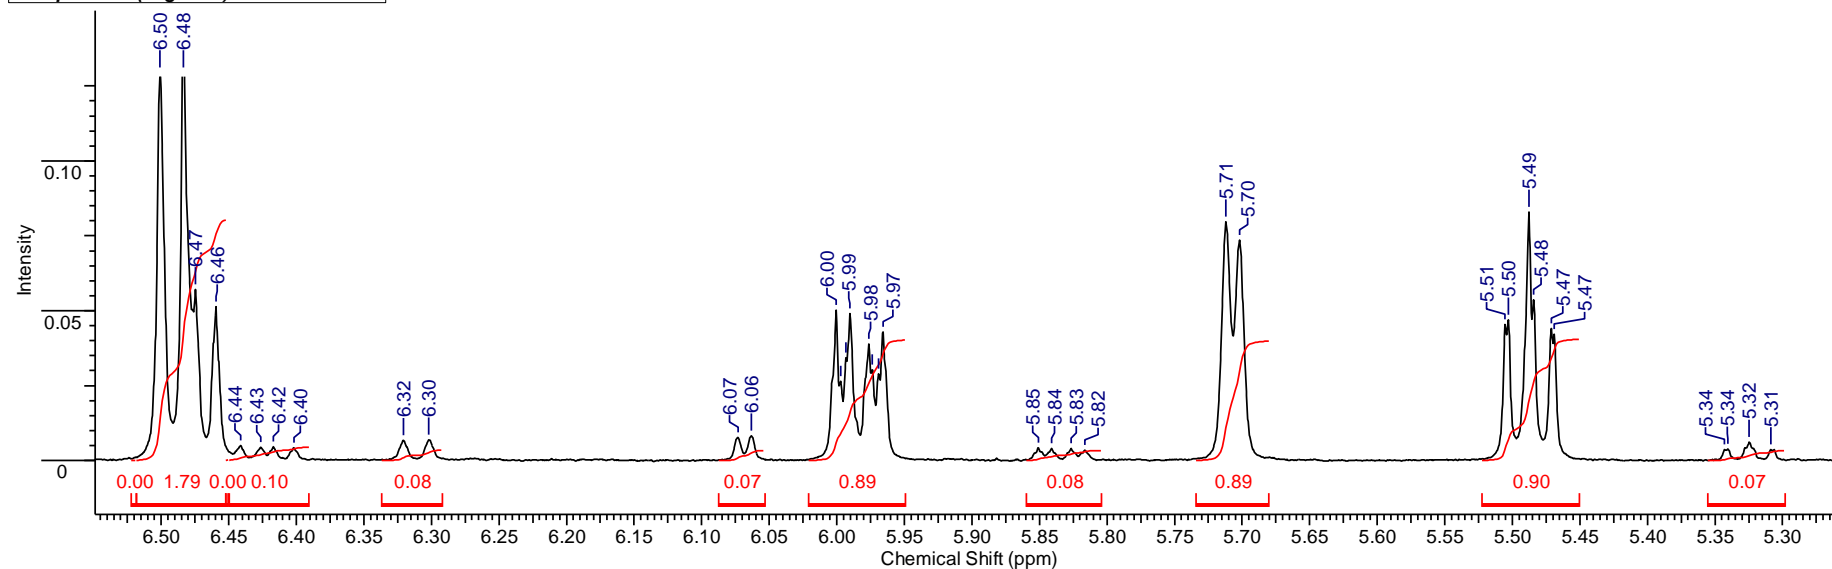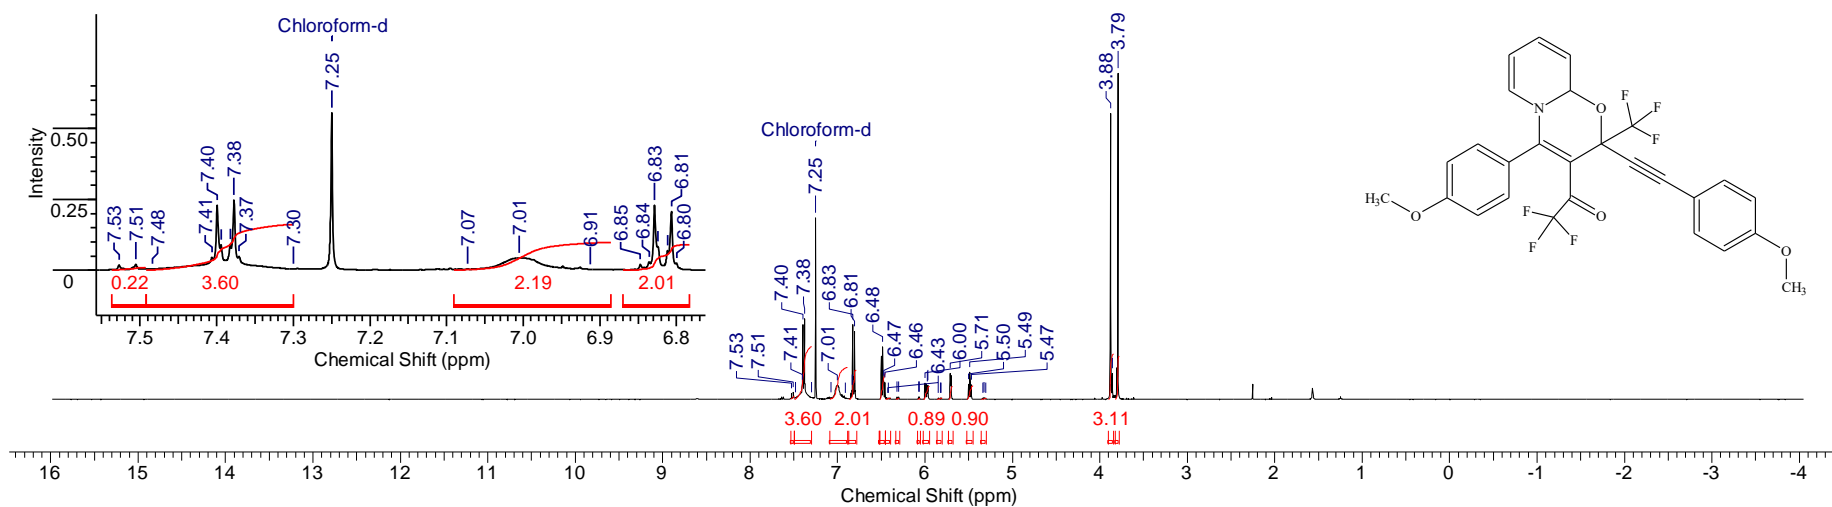

<sup>1</sup>H NMR spectrum of **3c** (400.1 MHz, CDCl<sub>3</sub>)

|                               |                                                 |                              |                      |                               |                      |
|-------------------------------|-------------------------------------------------|------------------------------|----------------------|-------------------------------|----------------------|
| <b>Acquisition Time (sec)</b> | 0.4999                                          | <b>Comment</b>               | Imported from UXMNR. | <b>Date</b>                   | 08 Nov 2018 12:28:40 |
| <b>File Name</b>              | C:\DOCS\BMSPEC_H.C I-XII.2018\BM-1417.C_002001r | <b>Frequency (MHz)</b>       | 100.61               | <b>Nucleus</b>                | 13C                  |
| <b>Number of Transients</b>   | 1086                                            | <b>Original Points Count</b> | 12076                | <b>Points Count</b>           | 65536                |
| <b>Solvent</b>                | CHLOROFORM-D                                    | <b>Sweep Width (Hz)</b>      | 24154.59             | <b>Pulse Sequence</b>         | zgpg30               |
|                               |                                                 |                              |                      | <b>Temperature (degree C)</b> | 27.000               |

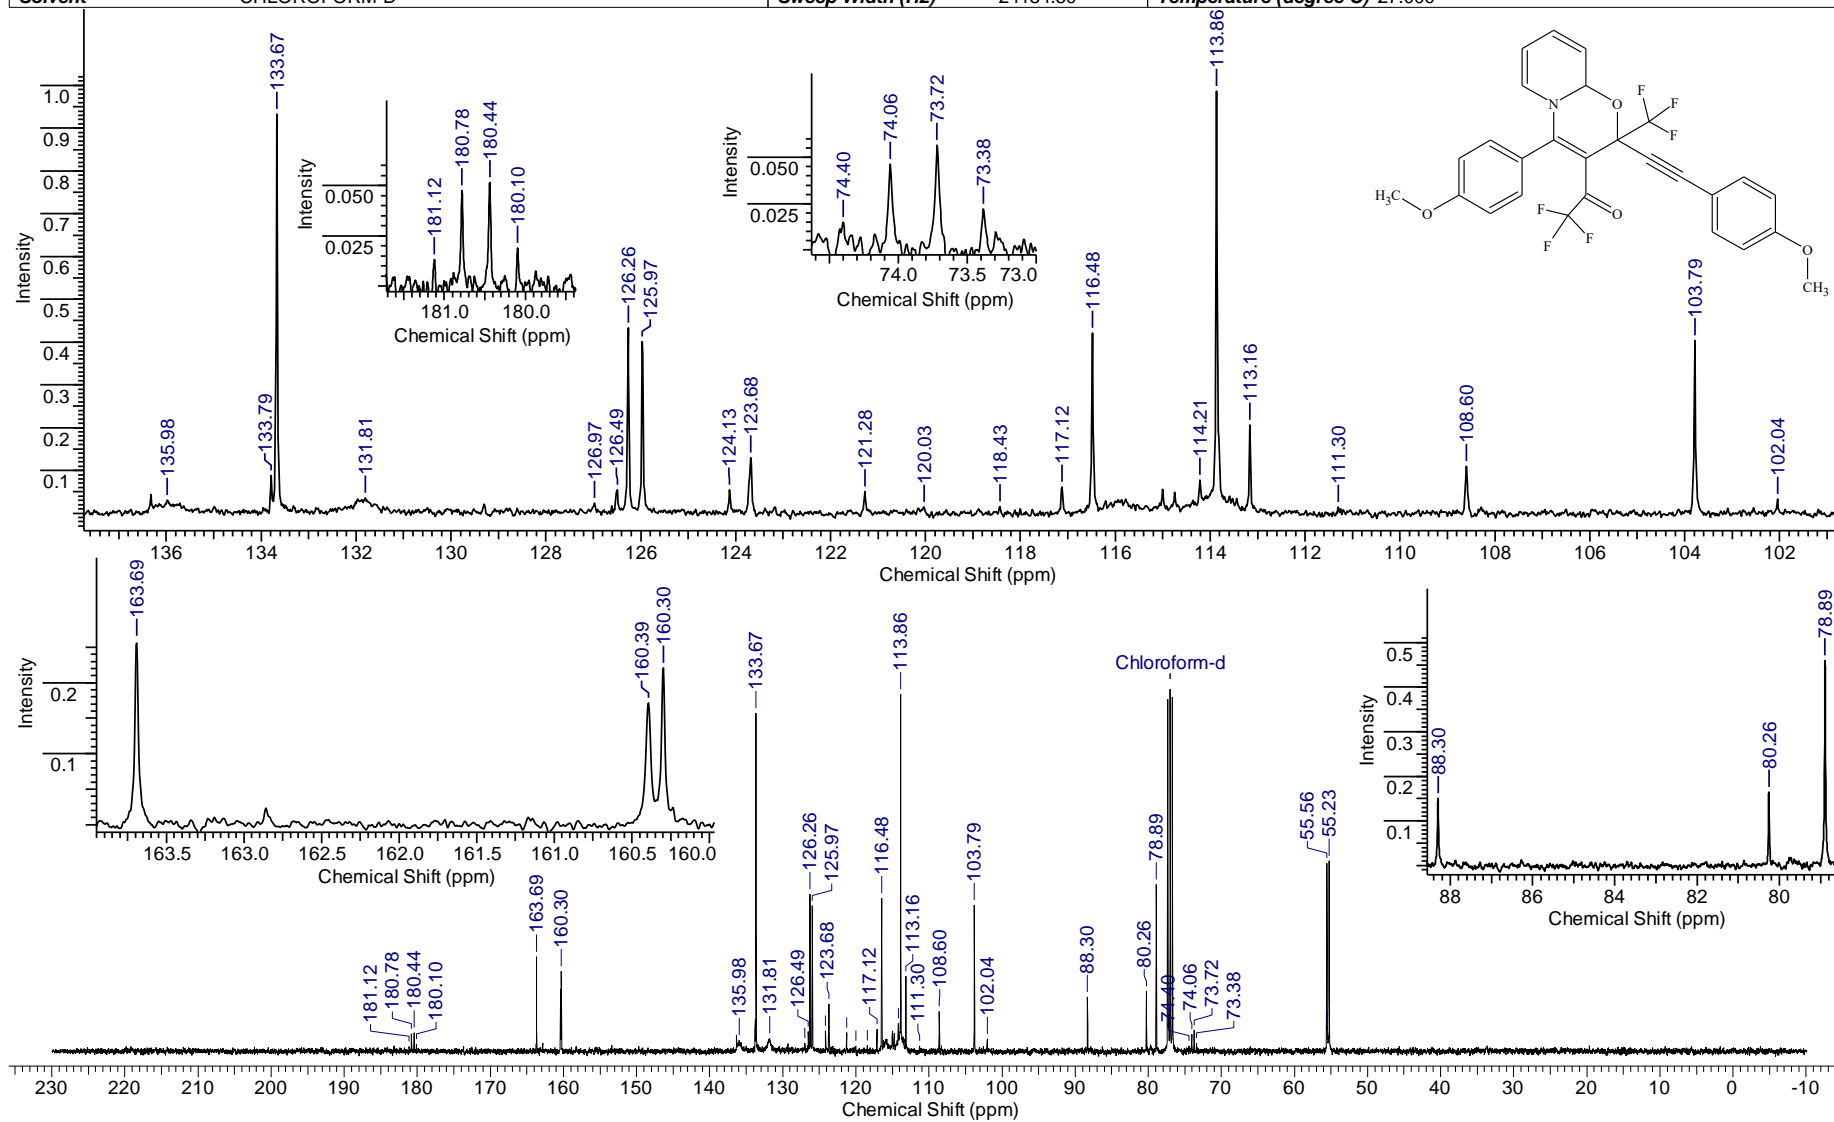

$^{13}\text{C}$  NMR spectrum of **3c** (100.6 MHz,  $\text{CDCl}_3$ )

|                        |        |                |             |                      |                                                                  |                       |          |
|------------------------|--------|----------------|-------------|----------------------|------------------------------------------------------------------|-----------------------|----------|
| Acquisition Time (sec) | 0.7340 | Date           | Oct 30 2018 | File Name            | C:\DOCS\BM\SPEC_BM_F_2018.12.25\bm1417-f_20181030_01\FLUORINE_01 |                       |          |
| Frequency (MHz)        | 376.31 | Nucleus        | 19F         | Number of Transients | 100                                                              | Original Points Count | 65536    |
| Points Count           | 65536  | Pulse Sequence | s2pul       | Solvent              | DMSO-D6                                                          | Sweep Width (Hz)      | 89285.71 |
| Temperature (degree C) | 22.000 |                |             |                      |                                                                  |                       |          |

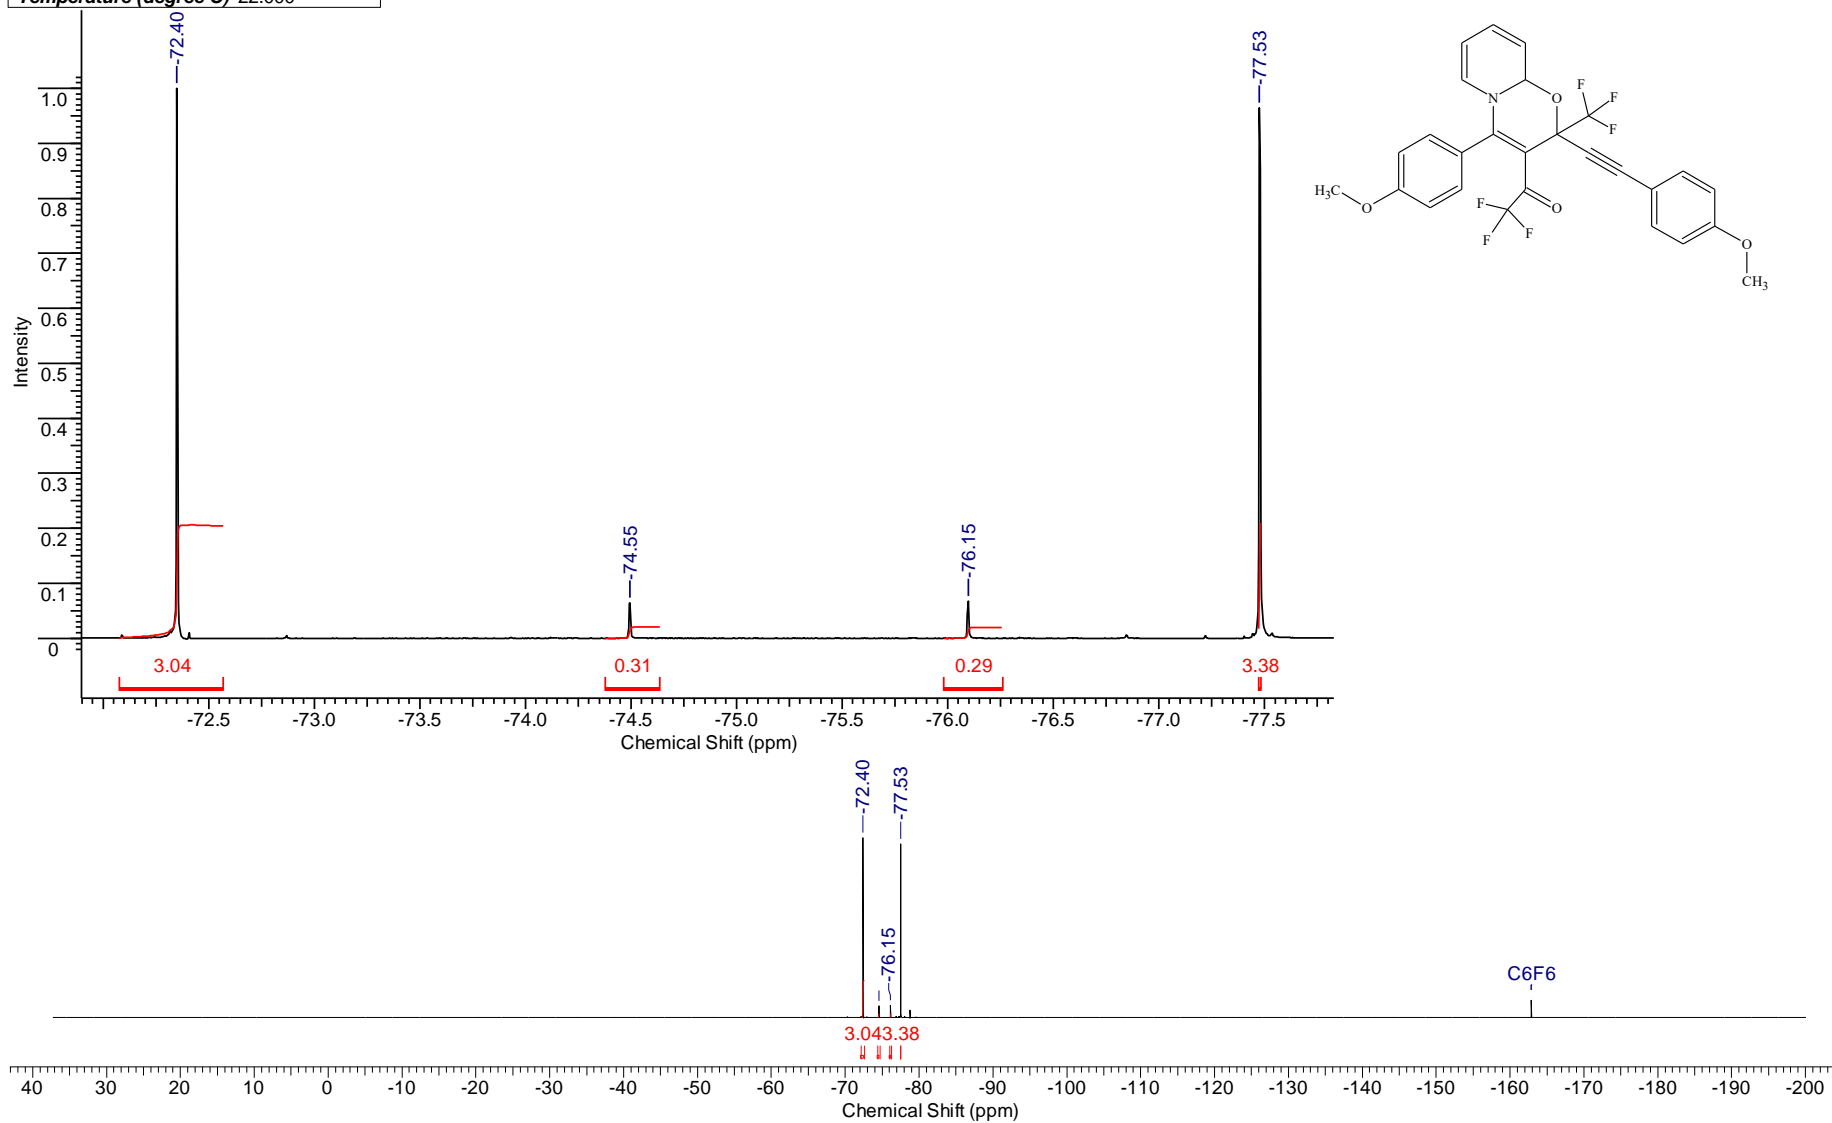 $^{19}\text{F}$  NMR spectrum of **3c** (376.3 MHz,  $\text{CDCl}_3$ )

|                        |                                                   |                       |                      |                        |                      |
|------------------------|---------------------------------------------------|-----------------------|----------------------|------------------------|----------------------|
| Acquisition Time (sec) | 2.5559                                            | Comment               | Imported from UXNMR. | Date                   | 13 Nov 2018 15:26:36 |
| File Name              | C:\DOCS\BMSPEC_H.C I-XII.2018\BM-1425-C.H_001001r | Frequency (MHz)       | 400.13               | Nucleus                | <sup>1</sup> H       |
| Number of Transients   | 6                                                 | Original Points Count | 16384                | Points Count           | 65536                |
| Solvent                | CHLOROFORM-D                                      | Sweep Width (Hz)      | 6410.26              | Pulse Sequence         | zg30                 |
|                        |                                                   |                       |                      | Temperature (degree C) | 27.000               |

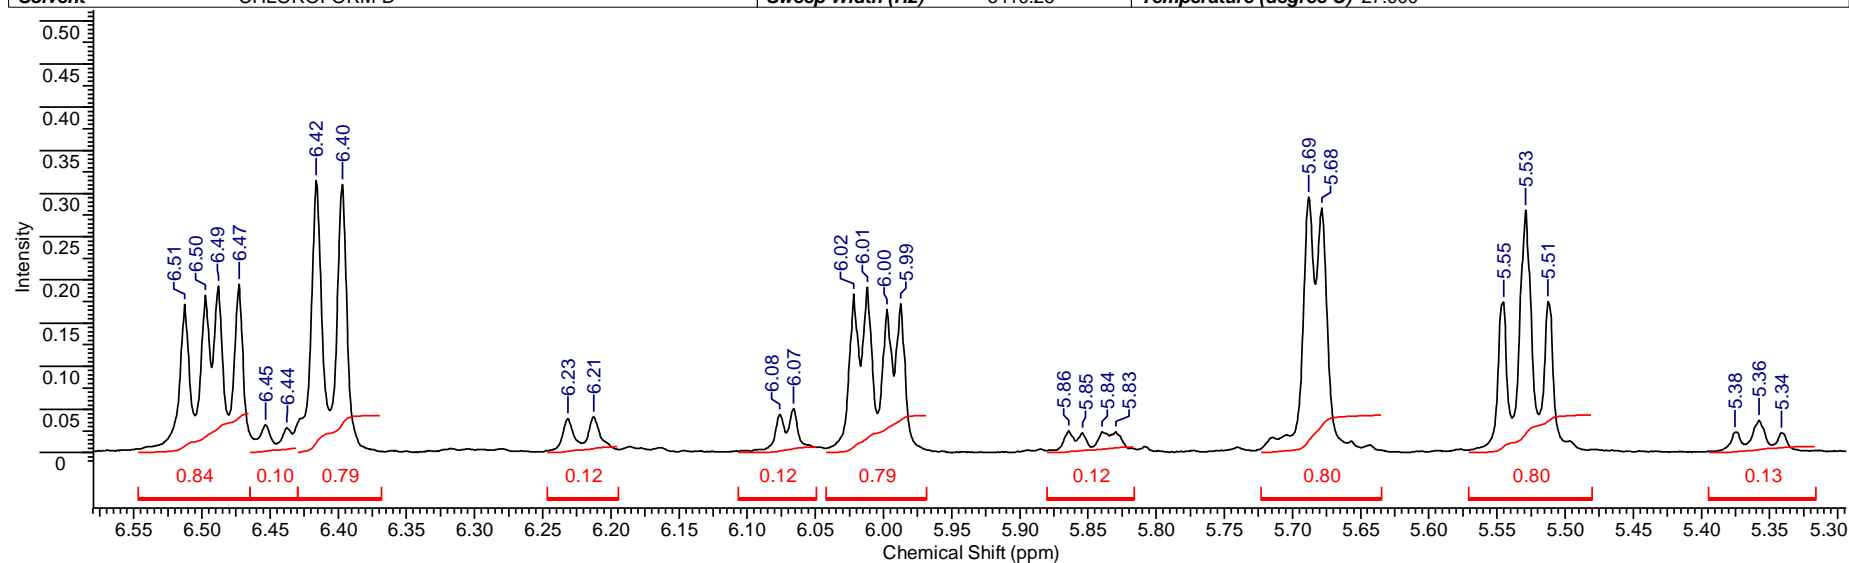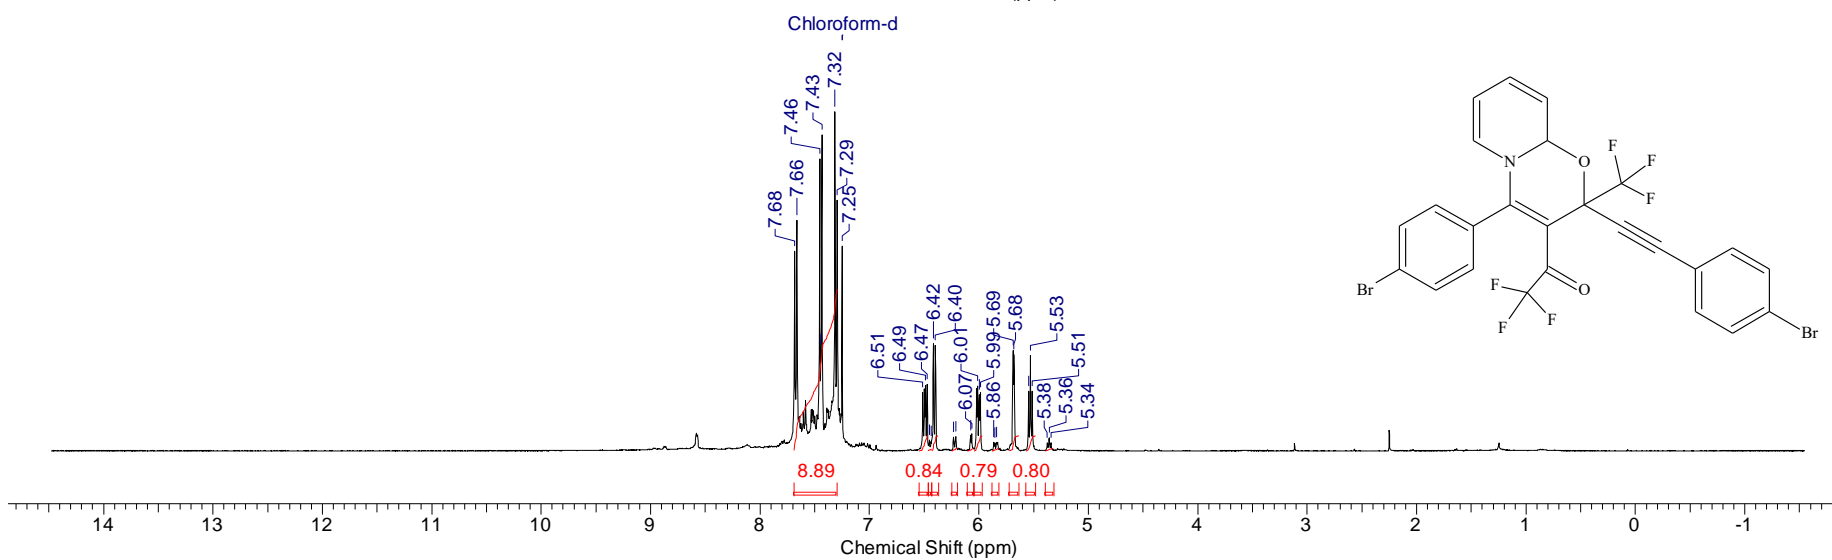

<sup>1</sup>H NMR spectrum of **3d** (400.1 MHz, CDCl<sub>3</sub>)

|                               |                                                   |                              |                      |                               |                      |
|-------------------------------|---------------------------------------------------|------------------------------|----------------------|-------------------------------|----------------------|
| <b>Acquisition Time (sec)</b> | 0.4999                                            | <b>Comment</b>               | Imported from UXNMR. | <b>Date</b>                   | 13 Nov 2018 15:58:00 |
| <b>File Name</b>              | C:\DOCS\BMSPEC_H.C_I-XII.2018\BM-1425-C.C_002001r | <b>Frequency (MHz)</b>       | 100.61               | <b>Nucleus</b>                | 13C                  |
| <b>Number of Transients</b>   | 1156                                              | <b>Original Points Count</b> | 12076                | <b>Points Count</b>           | 65536                |
| <b>Solvent</b>                | DMSO-D6                                           | <b>Sweep Width (Hz)</b>      | 24154.59             | <b>Temperature (degree C)</b> | 27.000               |

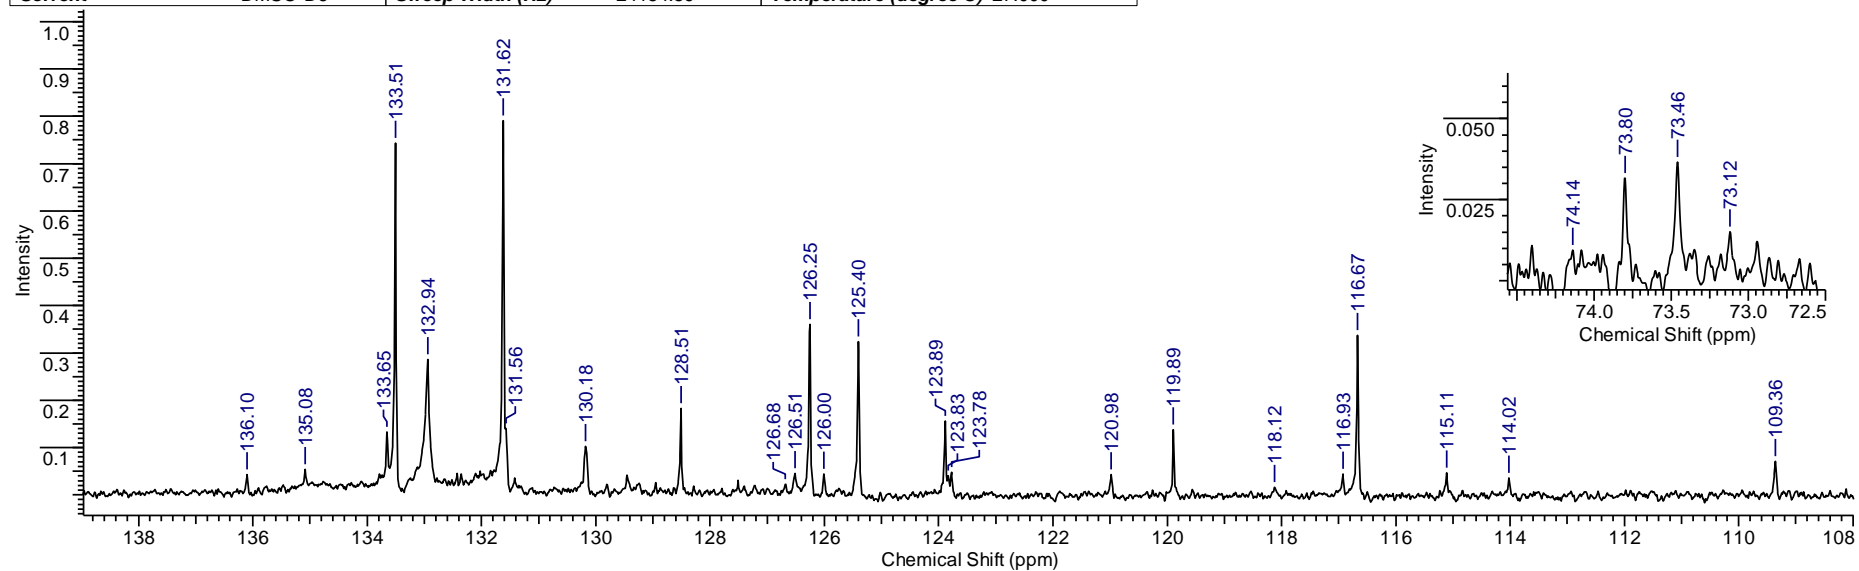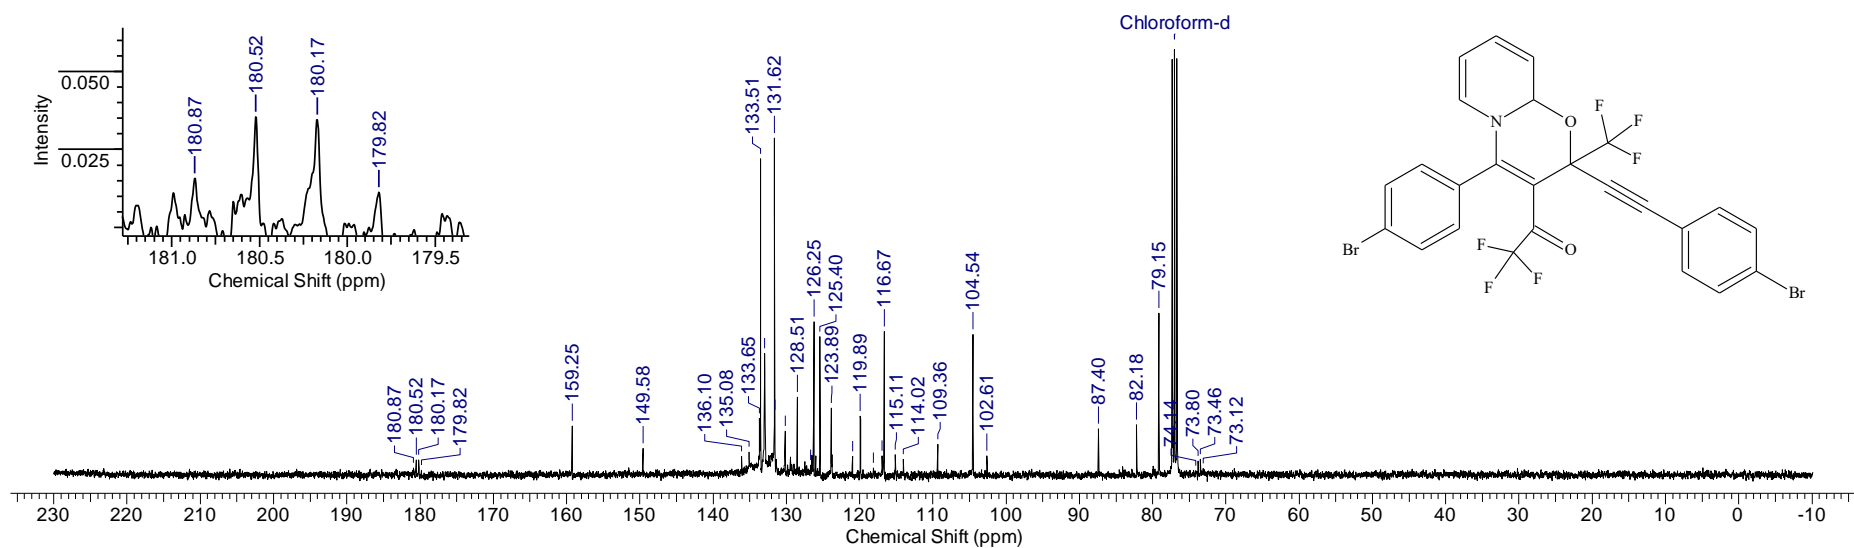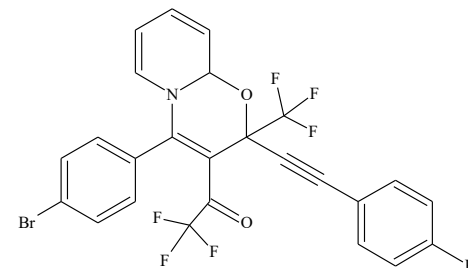

$^{13}\text{C}$  NMR spectrum of **3d** (100.6 MHz,  $\text{CDCl}_3$ )

|                        |          |                        |            |                      |                                                                |                       |       |
|------------------------|----------|------------------------|------------|----------------------|----------------------------------------------------------------|-----------------------|-------|
| Acquisition Time (sec) | 1.0000   | Date                   | Nov 2 2018 | File Name            | C:\DOCS\BMSPEC_BM_F_2018.12.25\BM-1425_20181102_01\FLUORINE_01 |                       |       |
| Frequency (MHz)        | 376.31   | Nucleus                | 19F        | Number of Transients | 16                                                             | Original Points Count | 89286 |
| Points Count           | 131072   | Pulse Sequence         | s2pul      | Solvent              | CHLOROFORM-D                                                   |                       |       |
| Sweep Width (Hz)       | 89285.71 | Temperature (degree C) | 22.000     |                      |                                                                |                       |       |

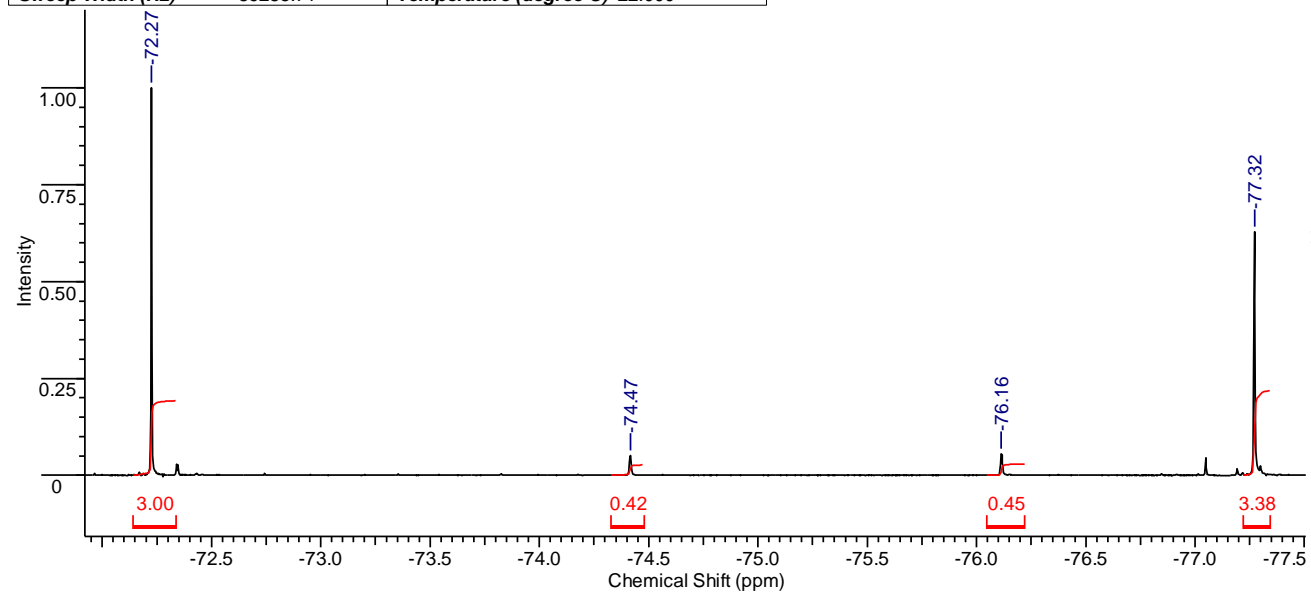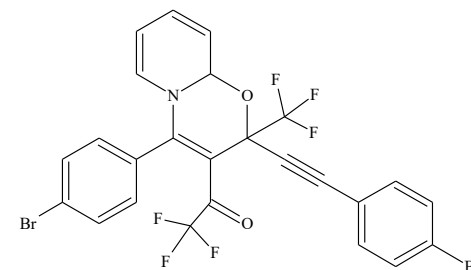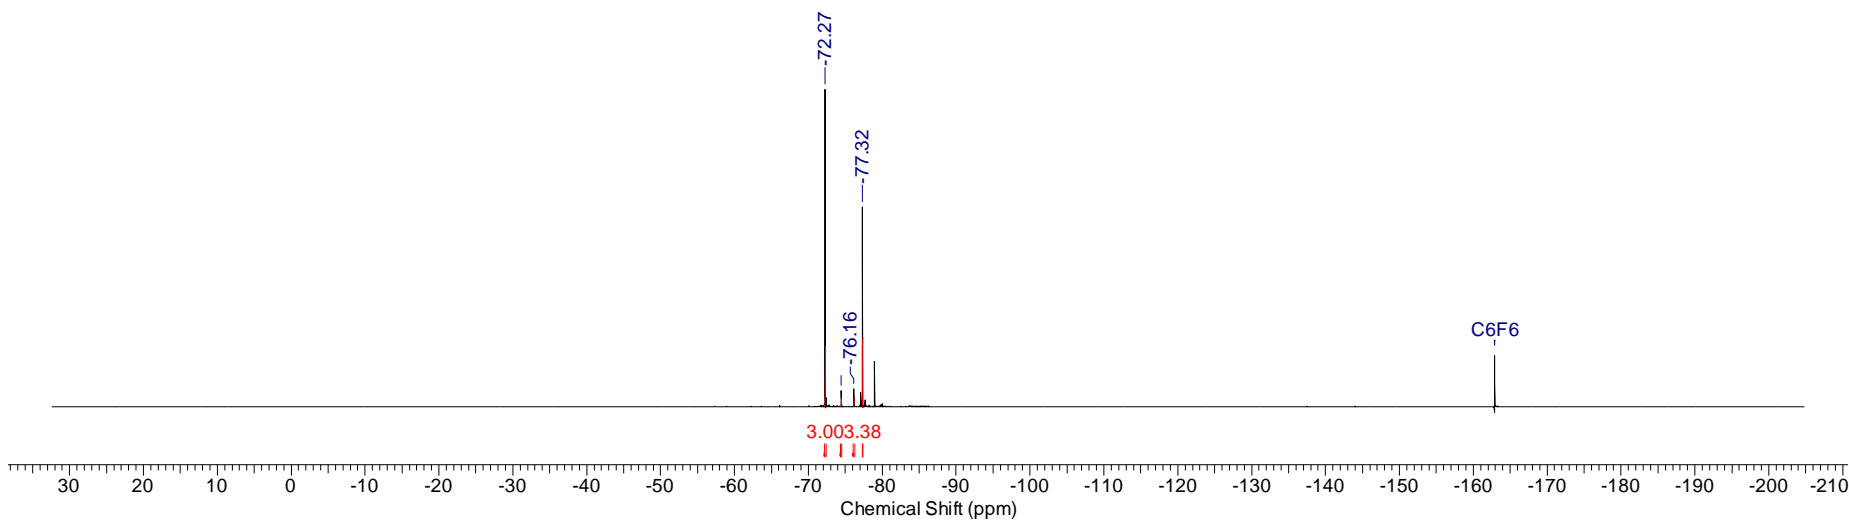

<sup>19</sup>F NMR spectrum of **3d** (376.3 MHz, CDCl<sub>3</sub>)



|                        |                                                 |                       |                      |                        |                      |
|------------------------|-------------------------------------------------|-----------------------|----------------------|------------------------|----------------------|
| Acquisition Time (sec) | 4.0894                                          | Comment               | Imported from UXNMR. | Date                   | 07 Nov 2018 17:10:10 |
| File Name              | C:\DOCS\BMSPEC_H.C_I-XII.2018\BM-1426.H_001001r | Frequency (MHz)       | 400.13               | Nucleus                | <sup>1</sup> H       |
| Number of Transients   | 5                                               | Original Points Count | 32768                | Points Count           | 131072               |
| Solvent                | ACETONITRILE-D3                                 | Sweep Width (Hz)      | 8012.82              | Pulse Sequence         | zg30                 |
|                        |                                                 |                       |                      | Temperature (degree C) | 27.000               |

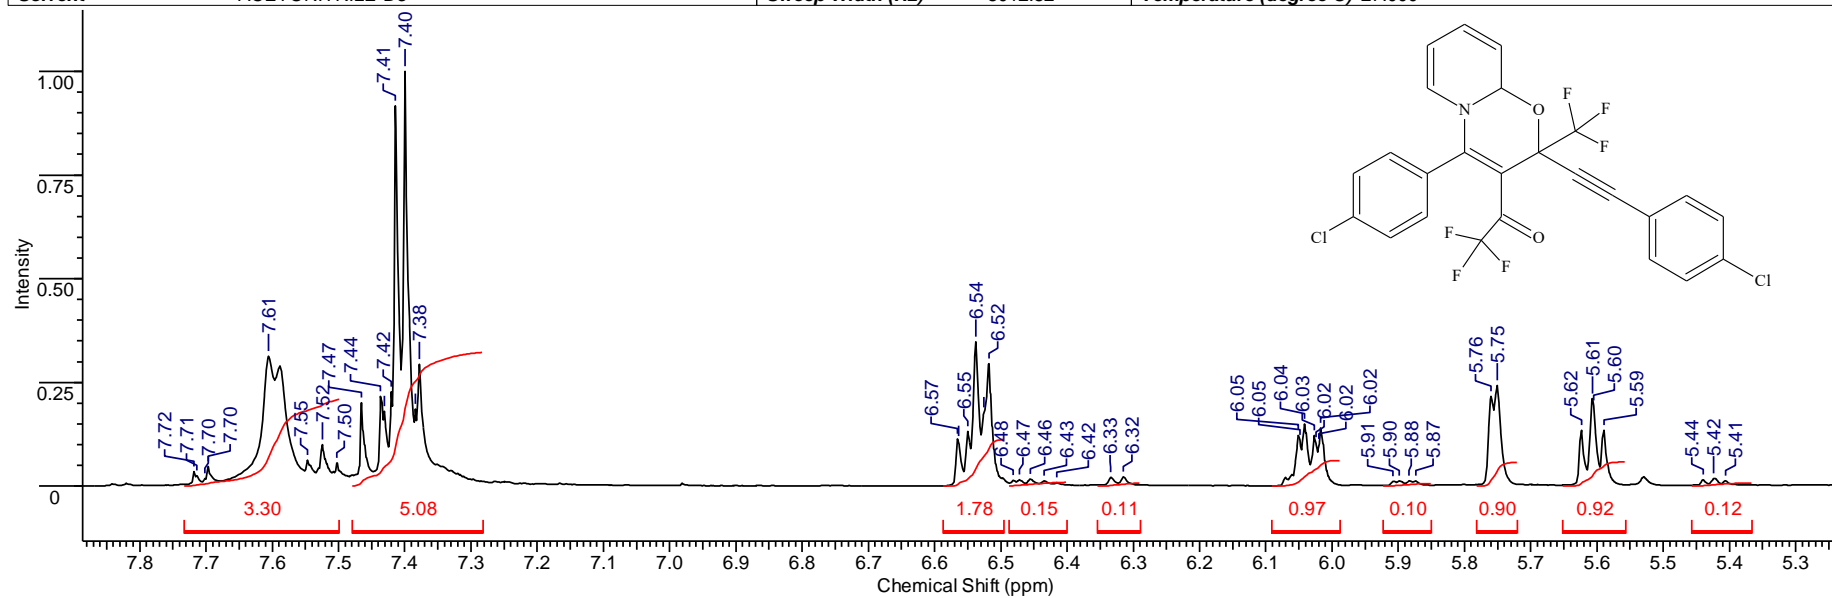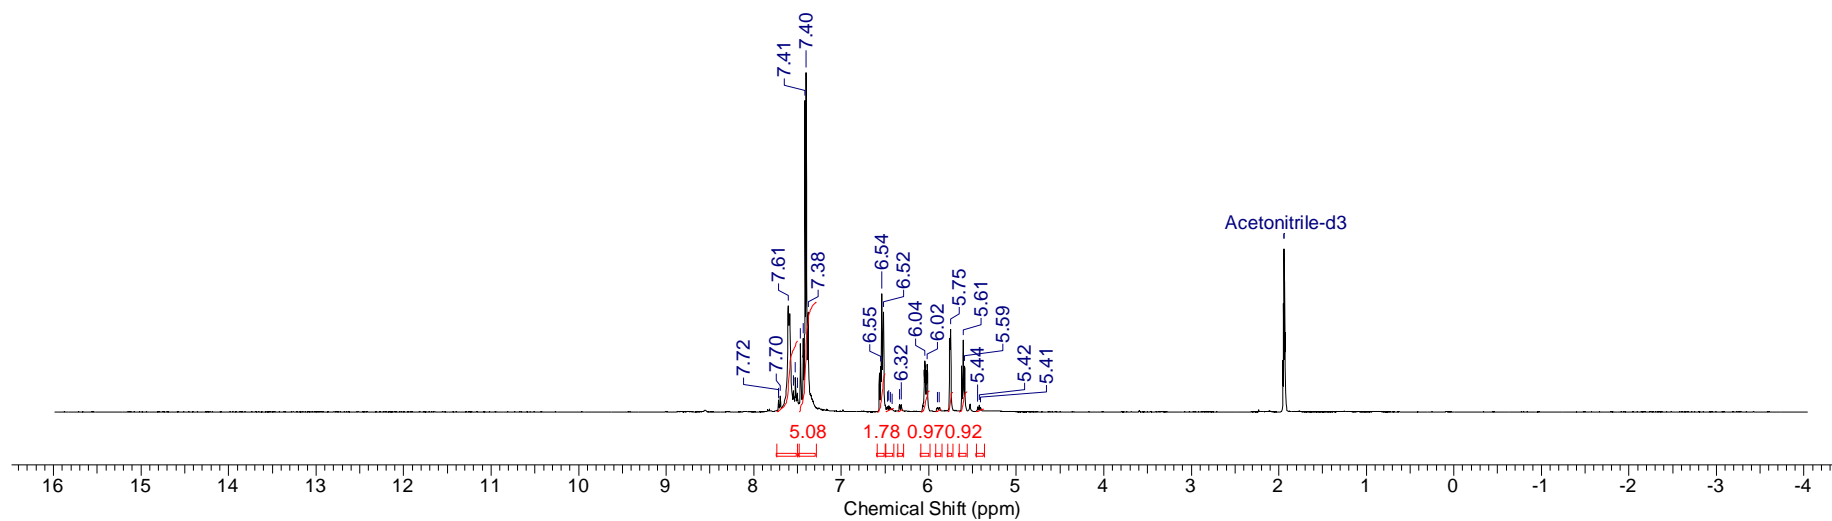

<sup>1</sup>H NMR spectrum of **3e** (400.1 MHz, CD<sub>3</sub>CN)

|                               |                                                                         |                              |                      |                         |                      |
|-------------------------------|-------------------------------------------------------------------------|------------------------------|----------------------|-------------------------|----------------------|
| <b>Acquisition Time (sec)</b> | 4.0894                                                                  | <b>Comment</b>               | Imported from UXMNR. | <b>Date</b>             | 06 Oct 2018 12:51:42 |
| <b>File Name</b>              | F:\COMP_PRAK\DOCS\OUTPUT_301\2018\10.f έγγάδου\181006\BM-1390-2_001001r | <b>Number of Transients</b>  | 8                    | <b>Frequency (MHz)</b>  | 400.13               |
| <b>Nucleus</b>                | <sup>1</sup> H                                                          | <b>Original Points Count</b> | 32768                | <b>Points Count</b>     | 131072               |
| <b>Pulse Sequence</b>         | zg30                                                                    | <b>Solvent</b>               | CHLOROFORM-D         | <b>Sweep Width (Hz)</b> | 8012.82              |
| <b>Temperature (degree C)</b> | 27.000                                                                  |                              |                      |                         |                      |

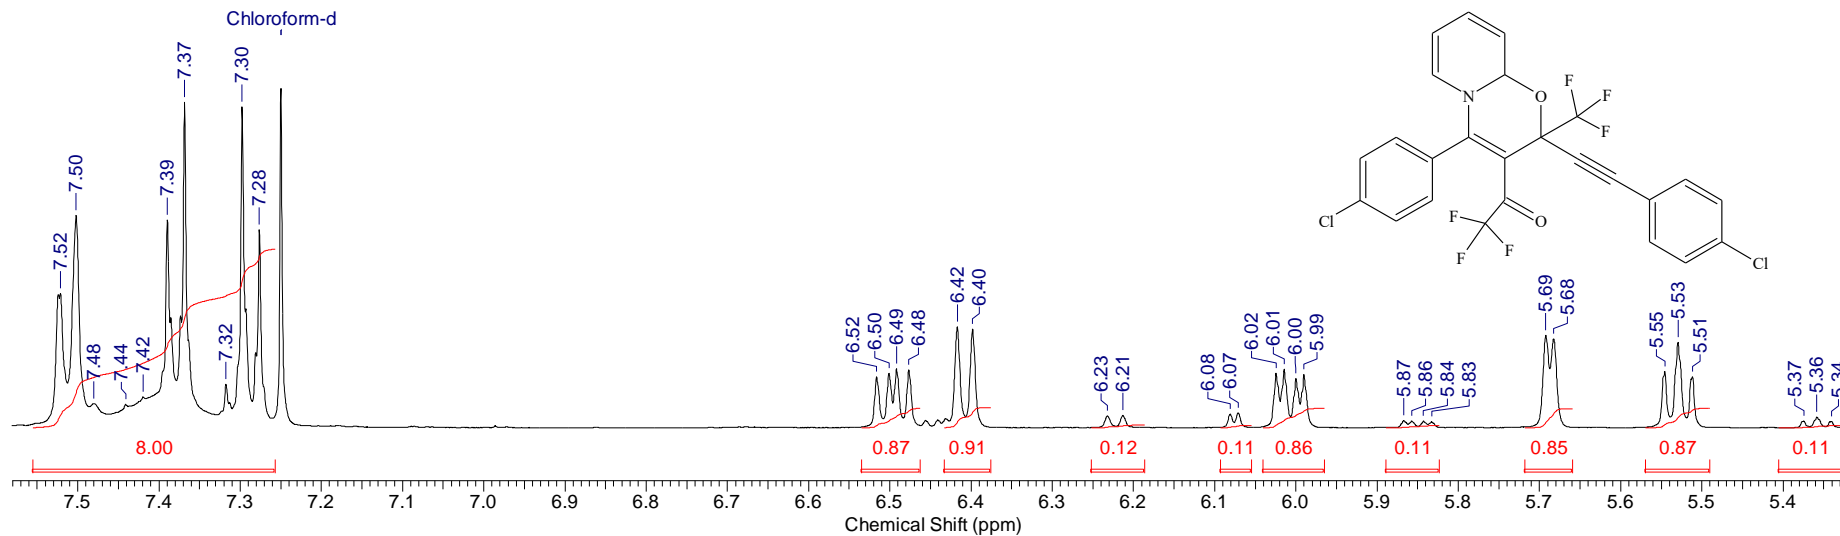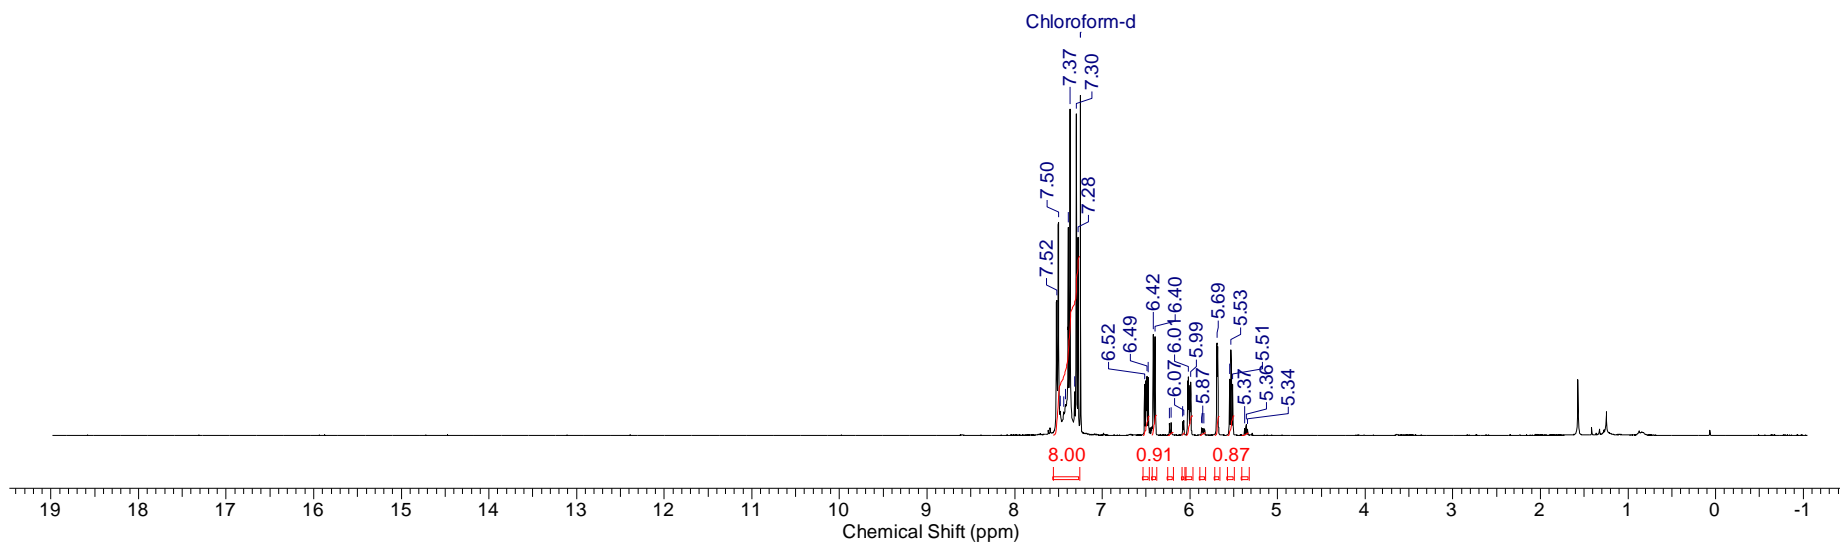

<sup>1</sup>H NMR spectrum of **3e** (400.1 MHz, CDCl<sub>3</sub>)

|                               |                                                 |                              |                      |                               |                      |
|-------------------------------|-------------------------------------------------|------------------------------|----------------------|-------------------------------|----------------------|
| <b>Acquisition Time (sec)</b> | 0.4999                                          | <b>Comment</b>               | Imported from UXNMR. | <b>Date</b>                   | 07 Nov 2018 17:38:58 |
| <b>File Name</b>              | C:\DOCS\BMSPEC_H.C_I-XII.2018\BM-1426.C_002001r | <b>Frequency (MHz)</b>       | 100.61               | <b>Nucleus</b>                | 13C                  |
| <b>Number of Transients</b>   | 1024                                            | <b>Original Points Count</b> | 12076                | <b>Points Count</b>           | 65536                |
| <b>Solvent</b>                | CHLOROFORM-D                                    | <b>Sweep Width (Hz)</b>      | 24154.59             | <b>Pulse Sequence</b>         | zgpg30               |
|                               |                                                 |                              |                      | <b>Temperature (degree C)</b> | 27.000               |

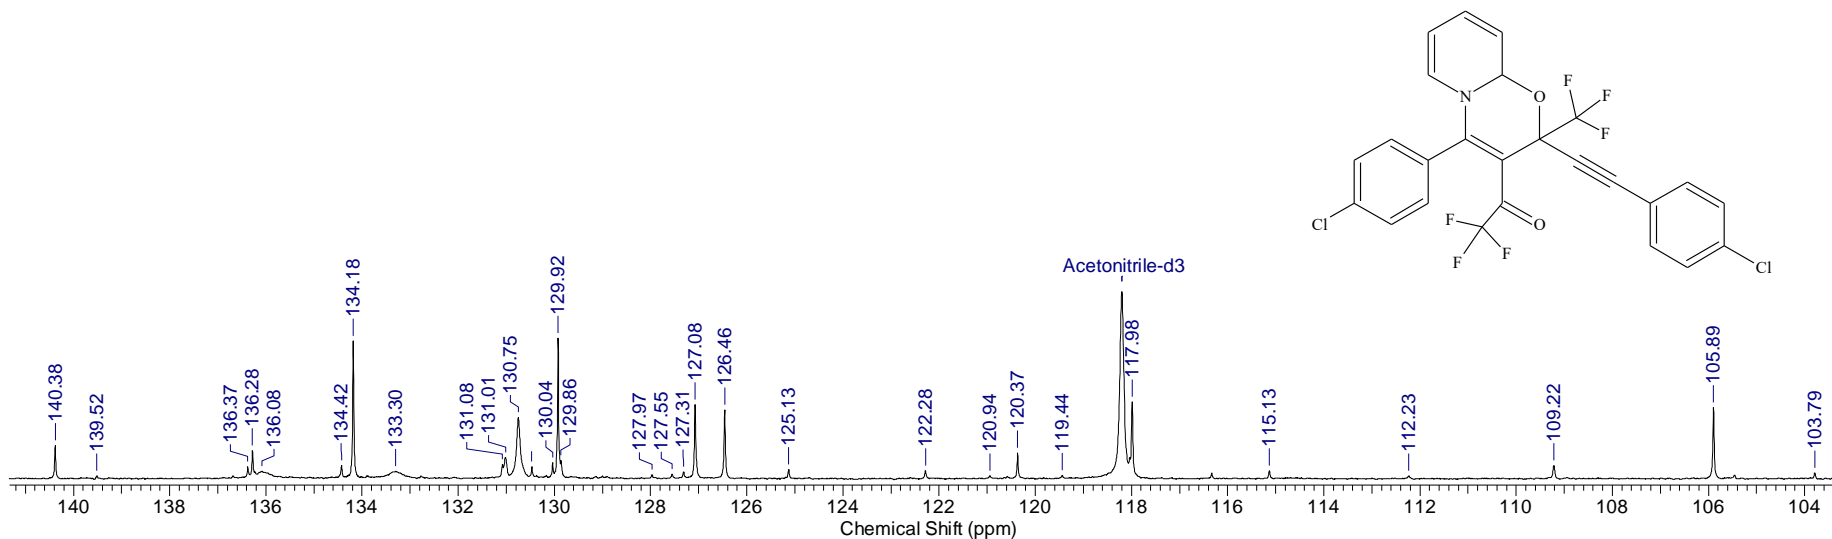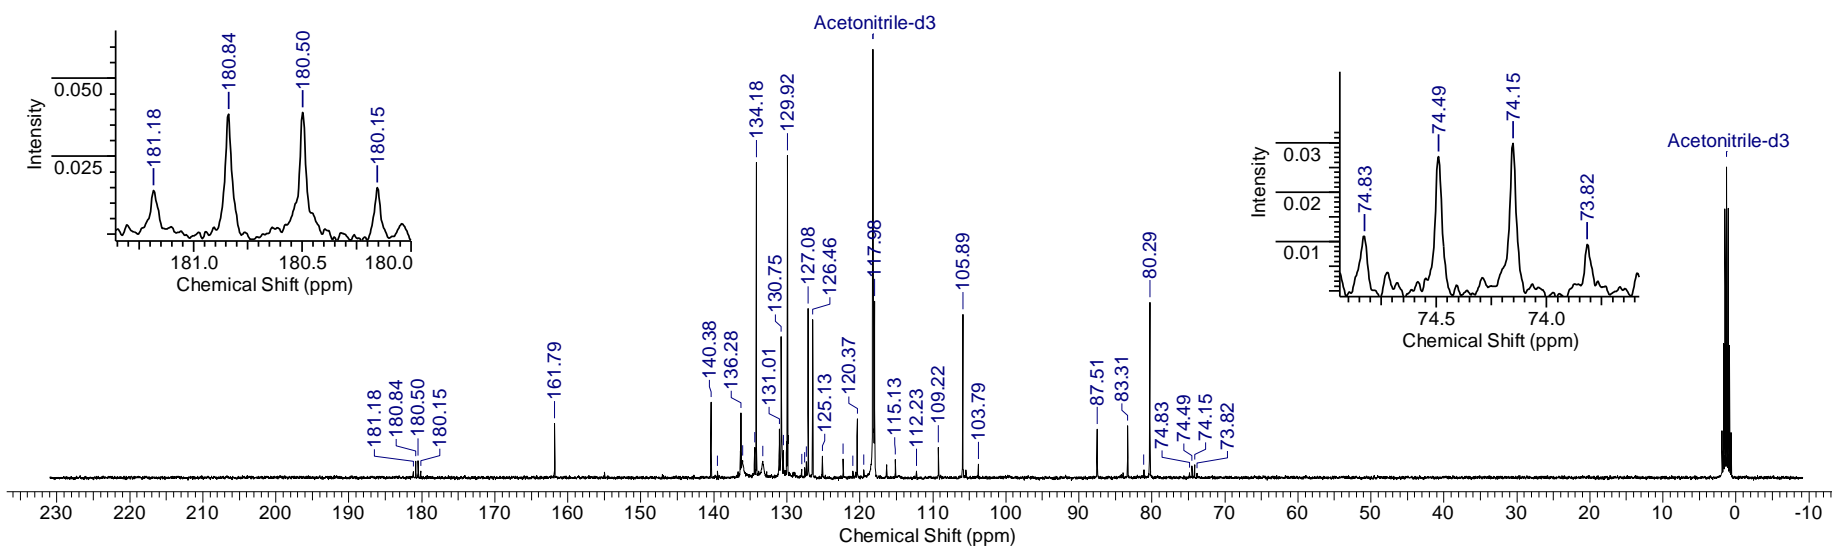

$^{13}\text{C}$  NMR spectrum of **3e** (100.6 MHz,  $\text{CD}_3\text{CN}$ )

|                               |                                                              |                             |                      |                              |             |                               |        |
|-------------------------------|--------------------------------------------------------------|-----------------------------|----------------------|------------------------------|-------------|-------------------------------|--------|
| <b>Acquisition Time (sec)</b> | 0.4999                                                       | <b>Comment</b>              | Imported from UXNMR. |                              | <b>Date</b> | 05 Oct 2018 15:54:24          |        |
| <b>File Name</b>              | F:\COMP_PRAK\DOCS\OUTPUT_301\2018\10.10\áð\BM-1390.C_002001r |                             |                      | <b>Frequency (MHz)</b>       | 100.61      |                               |        |
| <b>Nucleus</b>                | 13C                                                          | <b>Number of Transients</b> | 260                  | <b>Original Points Count</b> | 12076       | <b>Points Count</b>           | 65536  |
| <b>Pulse Sequence</b>         | zpgg30                                                       | <b>Solvent</b>              | DMSO-D6              | <b>Sweep Width (Hz)</b>      | 24154.59    | <b>Temperature (degree C)</b> | 27.000 |

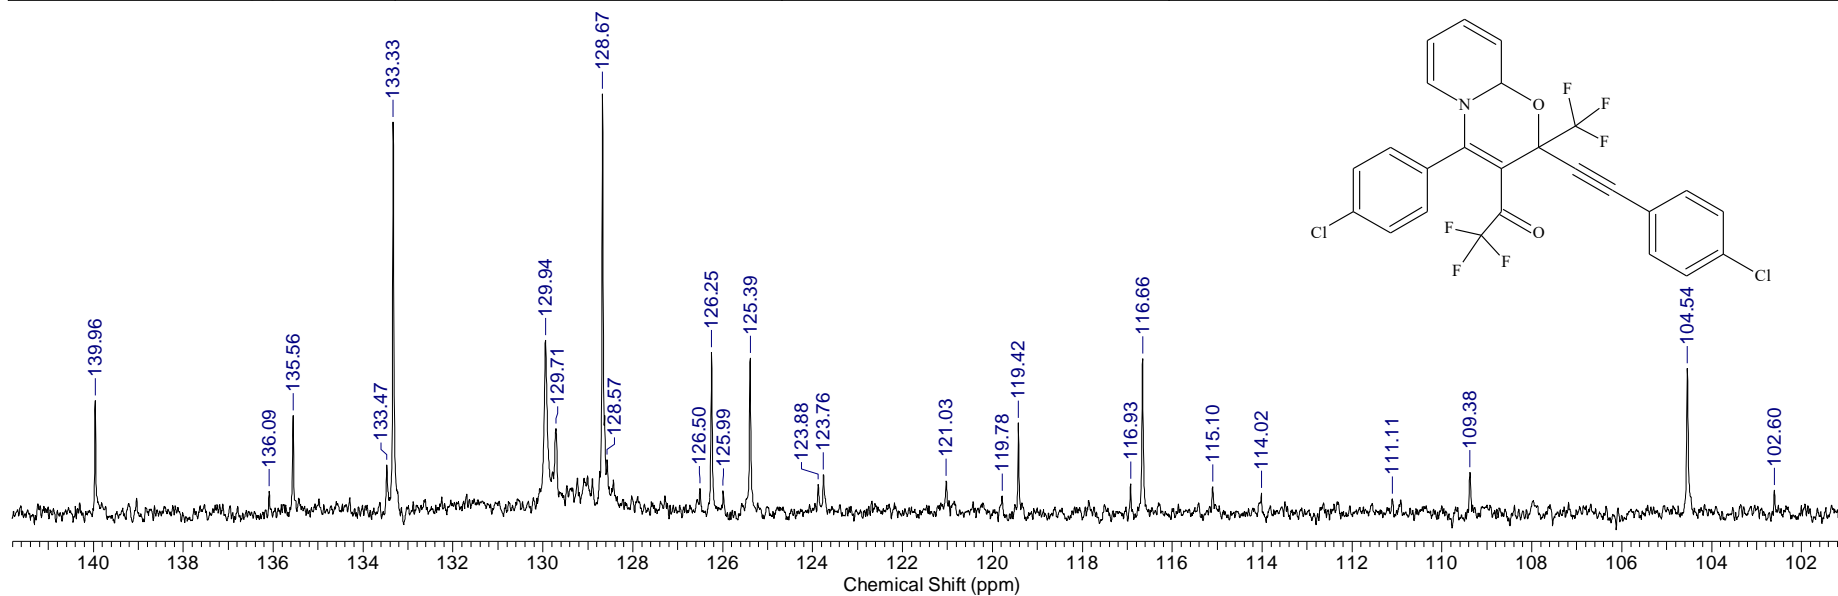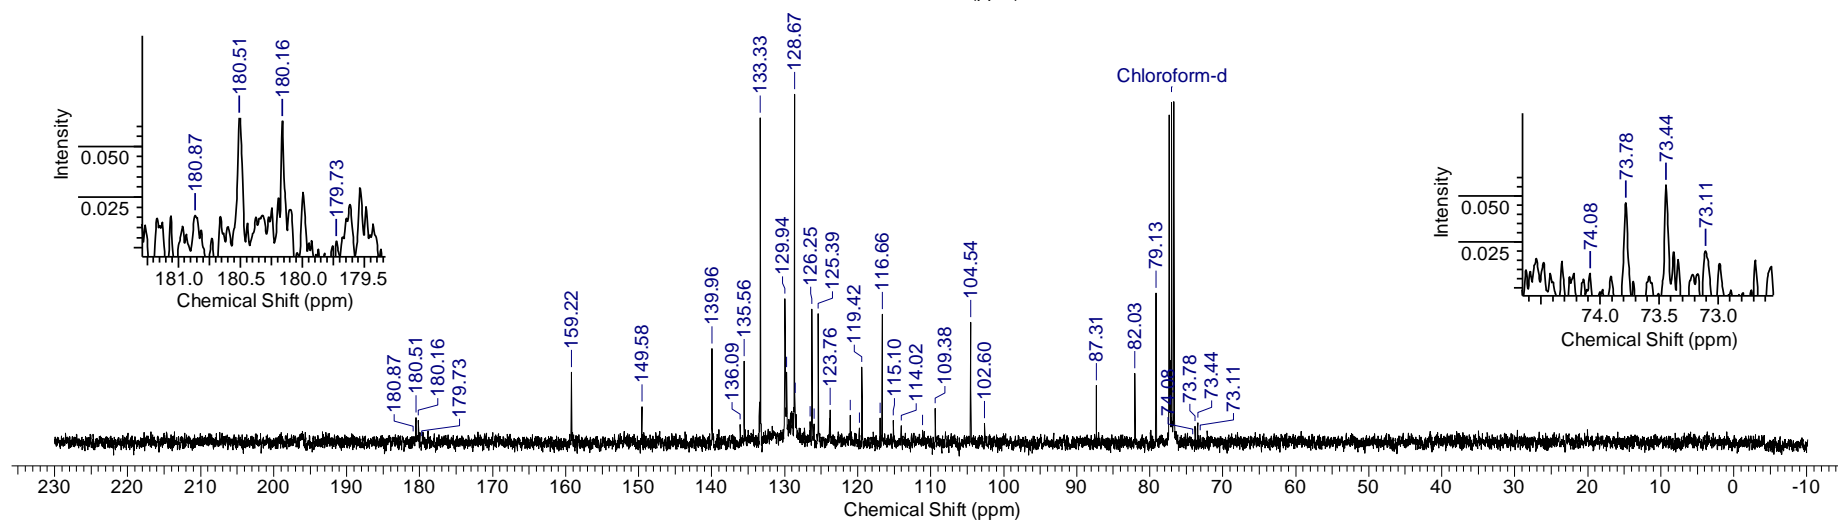

$^{13}\text{C}$  NMR spectrum of **3e** (100.6 MHz,  $\text{CDCl}_3$ )

|                        |          |                        |            |                      |                                                                             |                       |       |
|------------------------|----------|------------------------|------------|----------------------|-----------------------------------------------------------------------------|-----------------------|-------|
| Acquisition Time (sec) | 1.0000   | Date                   | Oct 5 2018 | File Name            | F:\COMP_PRAK\DOCS\OUTPUT_301\F19\2018.10.05\BM-1390_20181005_01\FLUORINE_01 |                       |       |
| Frequency (MHz)        | 376.31   | Nucleus                | 19F        | Number of Transients | 16                                                                          | Original Points Count | 89286 |
| Points Count           | 131072   | Pulse Sequence         | s2pul      | Solvent              | CHLOROFORM-D                                                                |                       |       |
| Sweep Width (Hz)       | 89285.71 | Temperature (degree C) | 22.000     |                      |                                                                             |                       |       |

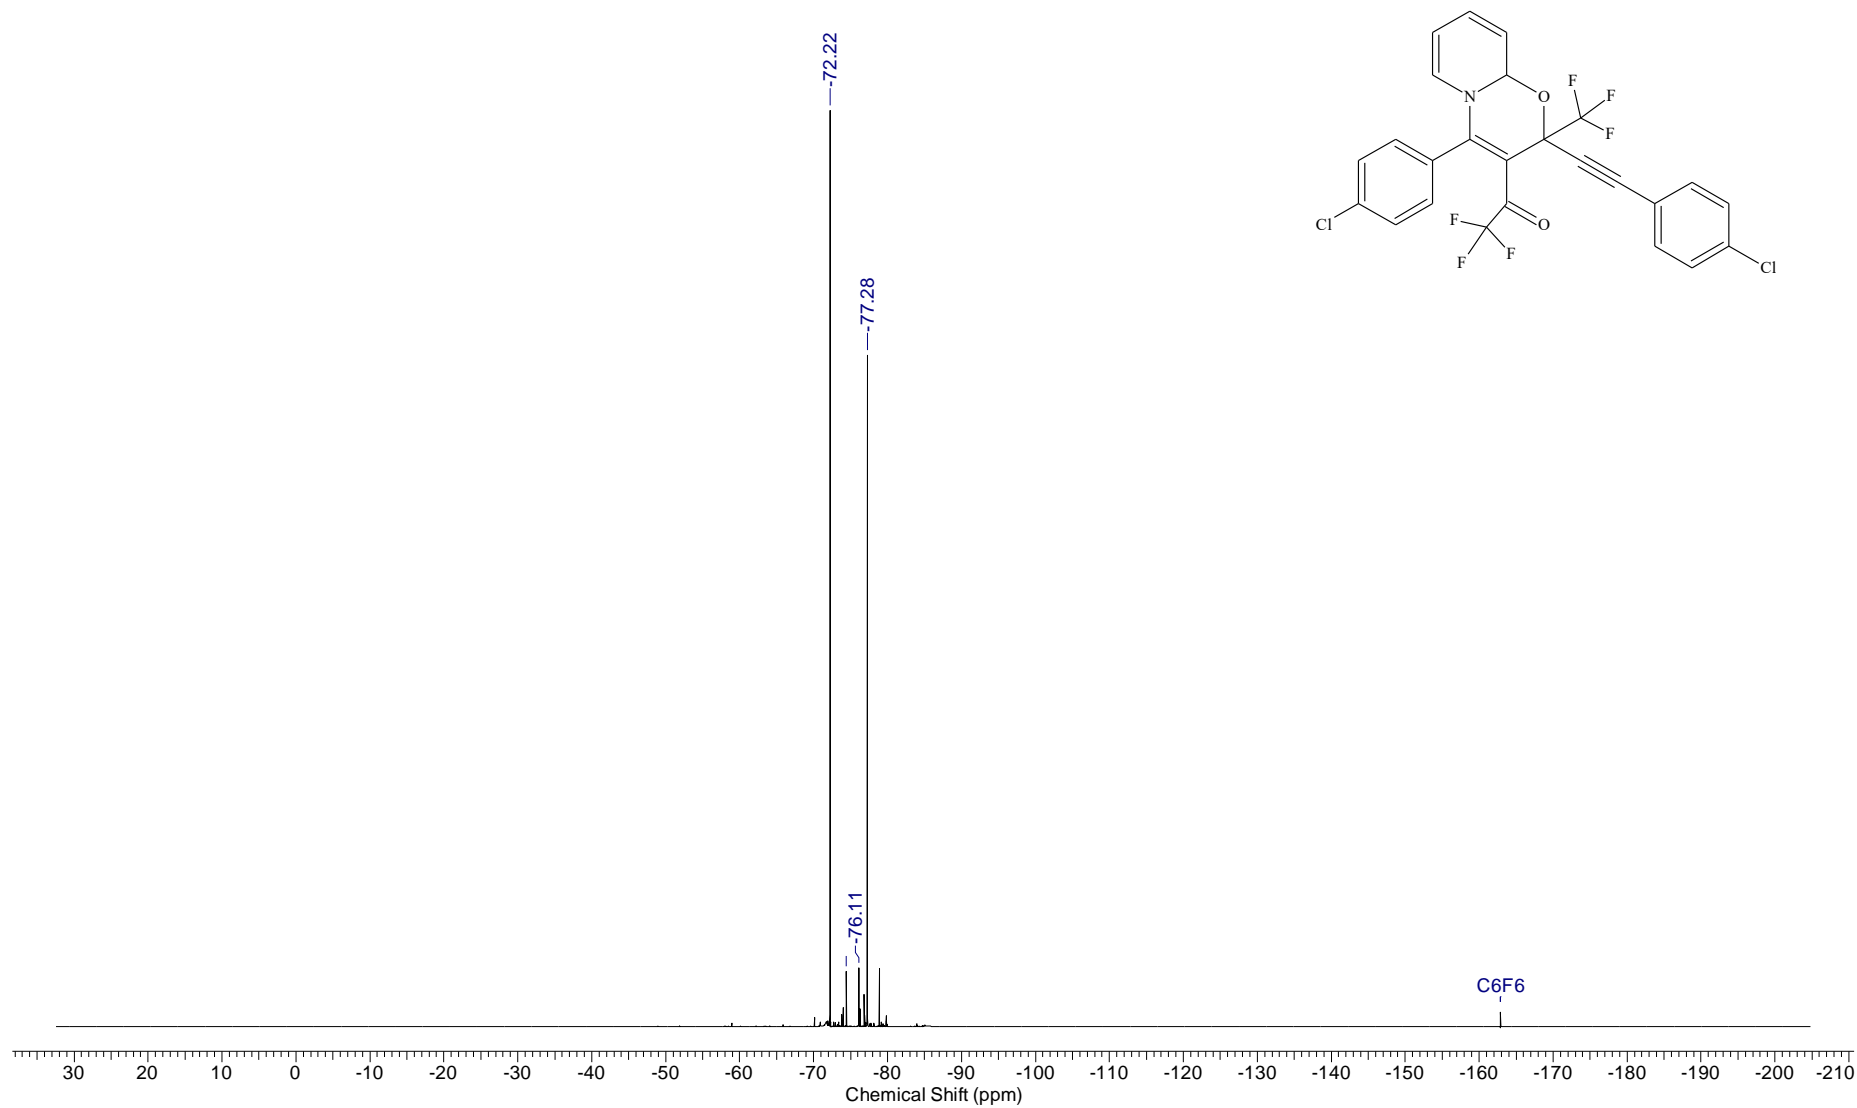

|                        |           |                        |            |                      |                                                                    |                       |        |
|------------------------|-----------|------------------------|------------|----------------------|--------------------------------------------------------------------|-----------------------|--------|
| Acquisition Time (sec) | 2.3069    | Date                   | Nov 8 2018 | File Name            | C:\DOCS\BMSPEC_BM_F_2018.12.25\BM-1426-d-F_20181108_01\FLUORINE_01 |                       |        |
| Frequency (MHz)        | 376.32    | Nucleus                | 19F        | Number of Transients | 8                                                                  | Original Points Count | 262144 |
| Points Count           | 262144    | Pulse Sequence         | s2pul      | Solvent              | ACETONITRILE-D3                                                    |                       |        |
| Sweep Width (Hz)       | 113636.37 | Temperature (degree C) | 22.000     |                      |                                                                    |                       |        |

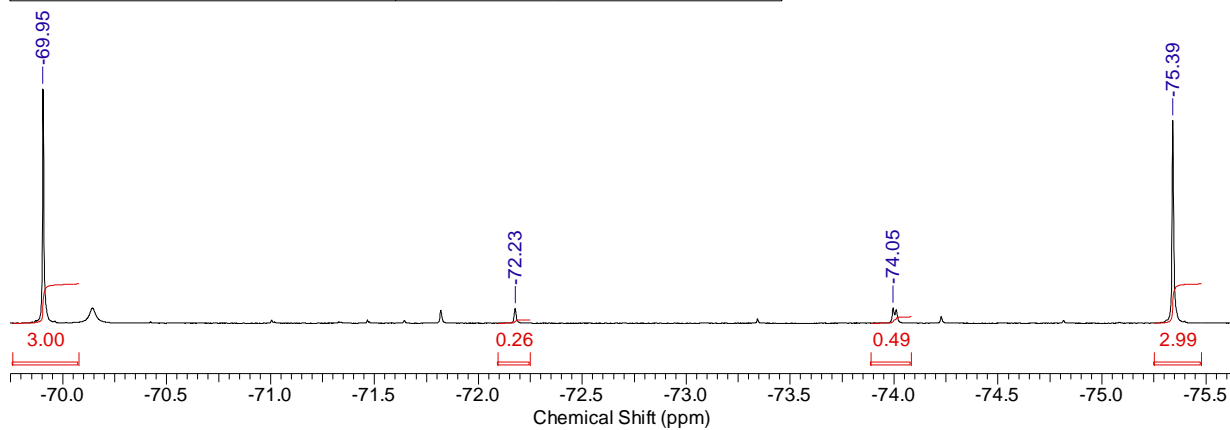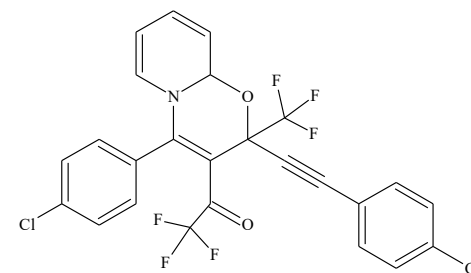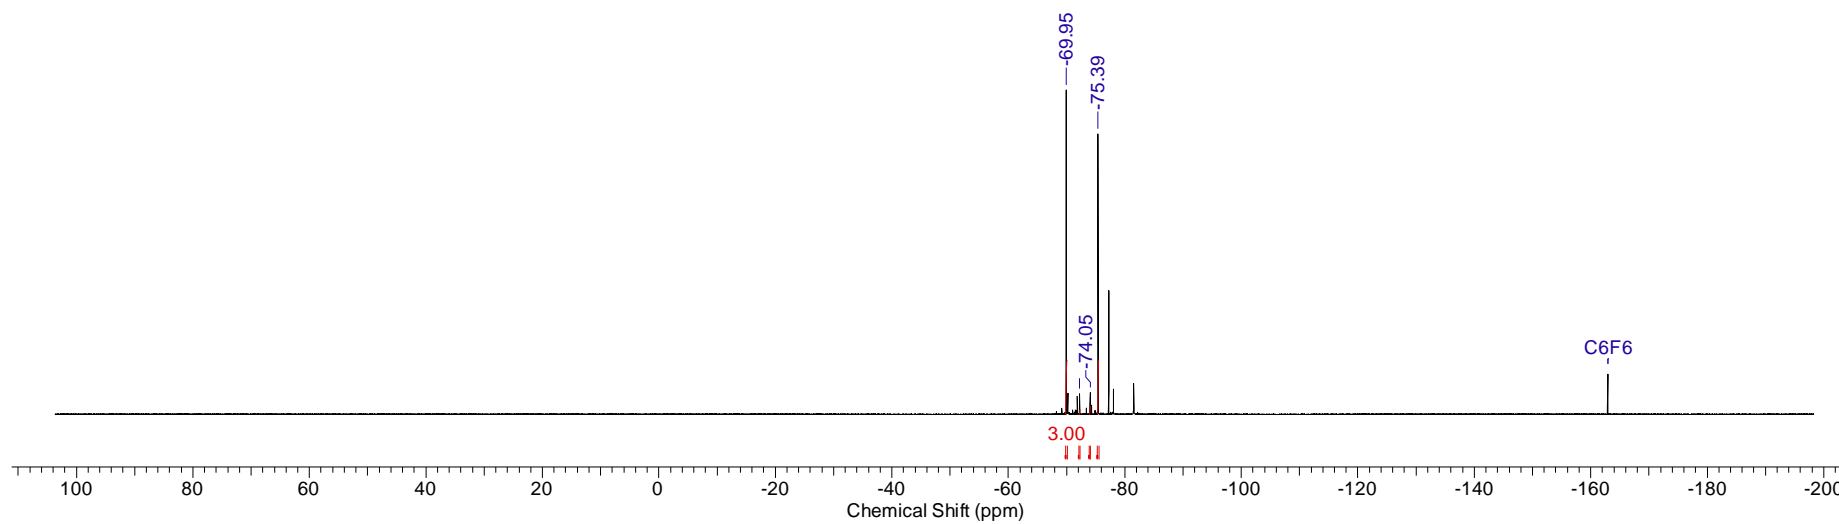

$^{19}\text{F}$  NMR spectrum of **3e** (376.3 MHz,  $\text{CD}_3\text{CN}$ )



|                               |                                                                |                             |                      |                               |                      |
|-------------------------------|----------------------------------------------------------------|-----------------------------|----------------------|-------------------------------|----------------------|
| <b>Acquisition Time (sec)</b> | 0.4999                                                         | <b>Comment</b>              | Imported from UXNMR. | <b>Date</b>                   | 03 Oct 2018 18:09:32 |
| <b>File Name</b>              | F:\COMP_PRAKIDOC\OUTPUT_301\2018\10.1 έβγάδι\BM-1387_C_002001r | <b>Frequency (MHz)</b>      | 100.61               | <b>Points Count</b>           | 65536                |
| <b>Nucleus</b>                | 13C                                                            | <b>Number of Transients</b> | 512                  | <b>Original Points Count</b>  | 12076                |
| <b>Pulse Sequence</b>         | zpgp30                                                         | <b>Solvent</b>              | DMSO-D6              | <b>Sweep Width (Hz)</b>       | 24154.59             |
|                               |                                                                |                             |                      | <b>Temperature (degree C)</b> | 27.000               |

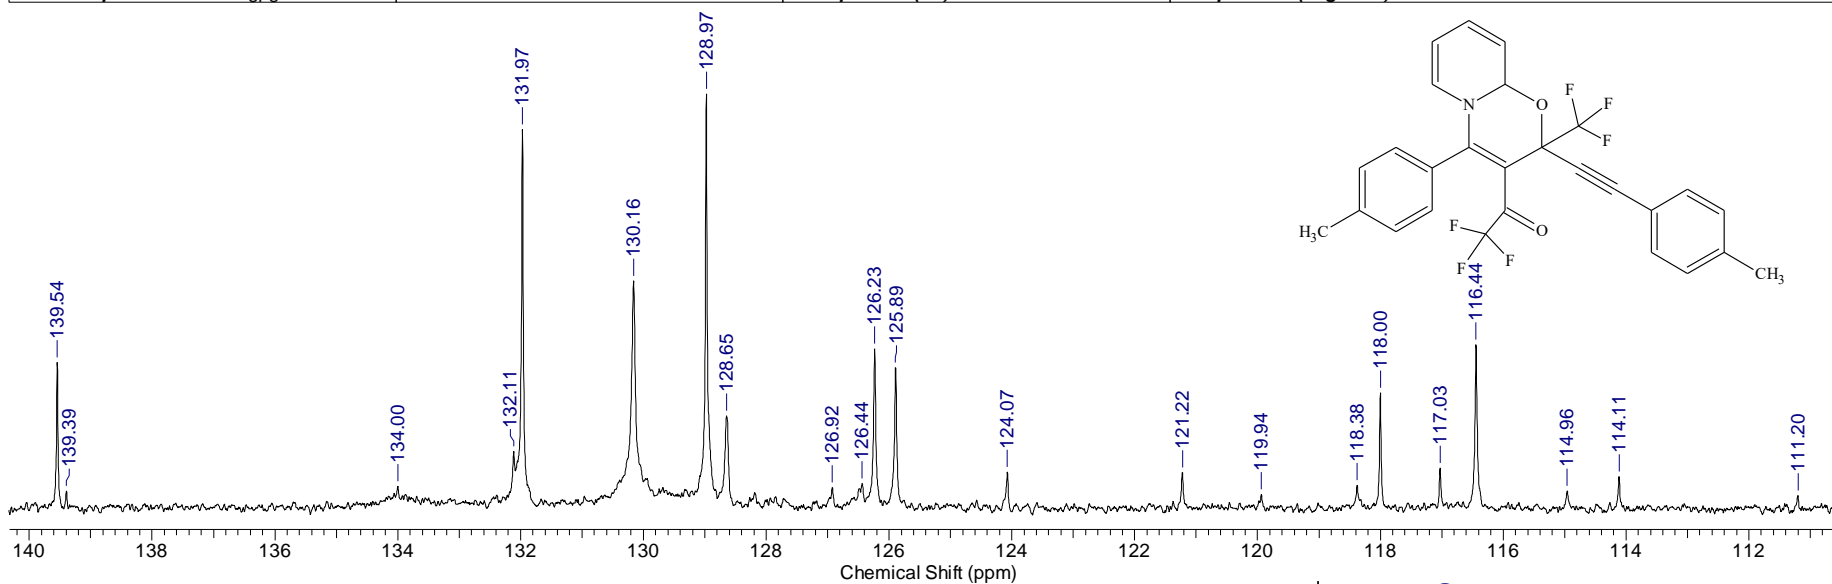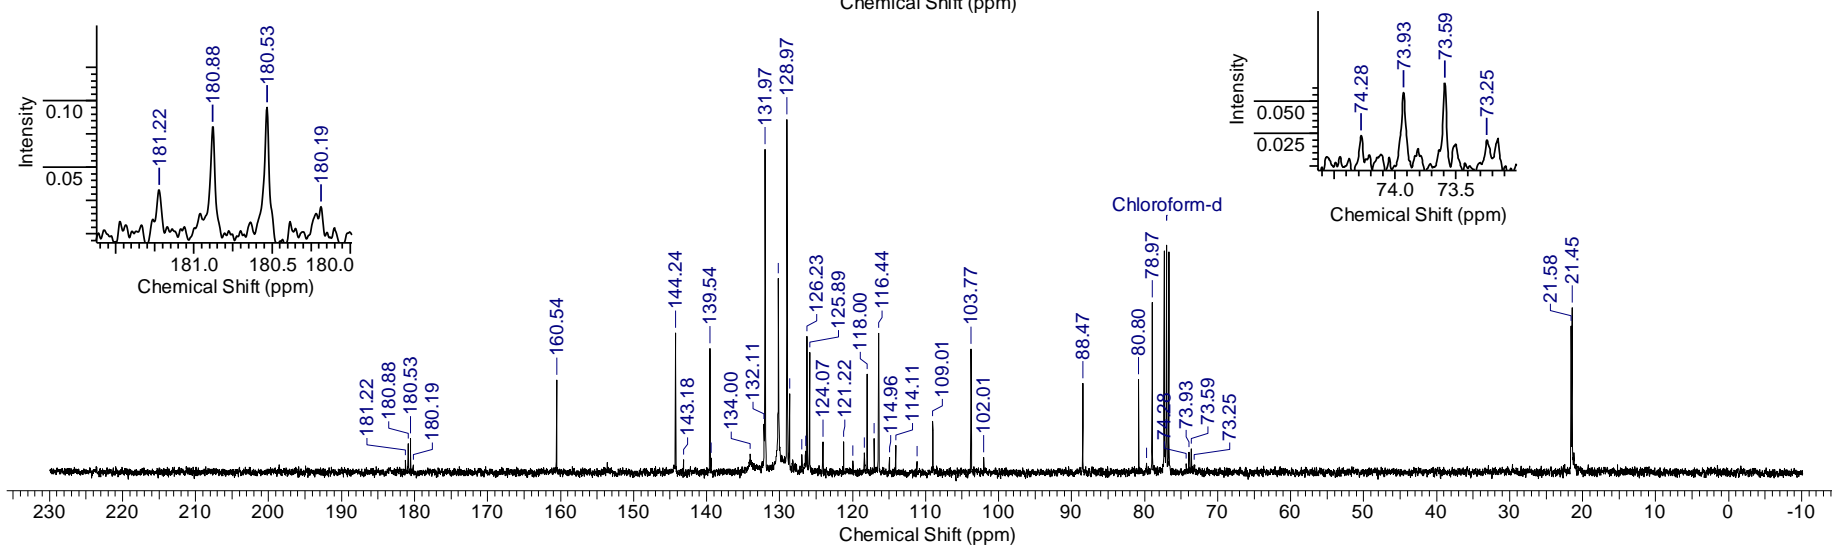

$^{13}\text{C}$  NMR spectrum of **3f** (100.6 MHz,  $\text{CDCl}_3$ )



|                        |                                                                                |                      |              |                       |           |
|------------------------|--------------------------------------------------------------------------------|----------------------|--------------|-----------------------|-----------|
| Acquisition Time (sec) | 2.3069                                                                         | Date                 | Oct 4 2018   | Frequency (MHz)       | 376.32    |
| File Name              | F:\COMP_PRAK\DOCS\OUTPUT_301\F19\2018.10.04\BM-13878-F_20181004_01\FLUORINE_01 |                      |              | Points Count          | 262144    |
| Nucleus                | 19F                                                                            | Number of Transients | 8            | Original Points Count | 262144    |
| Pulse Sequence         | s2pul                                                                          | Solvent              | CHLOROFORM-D | Sweep Width (Hz)      | 113636.37 |
| Temperature (degree C) | 22.000                                                                         |                      |              |                       |           |

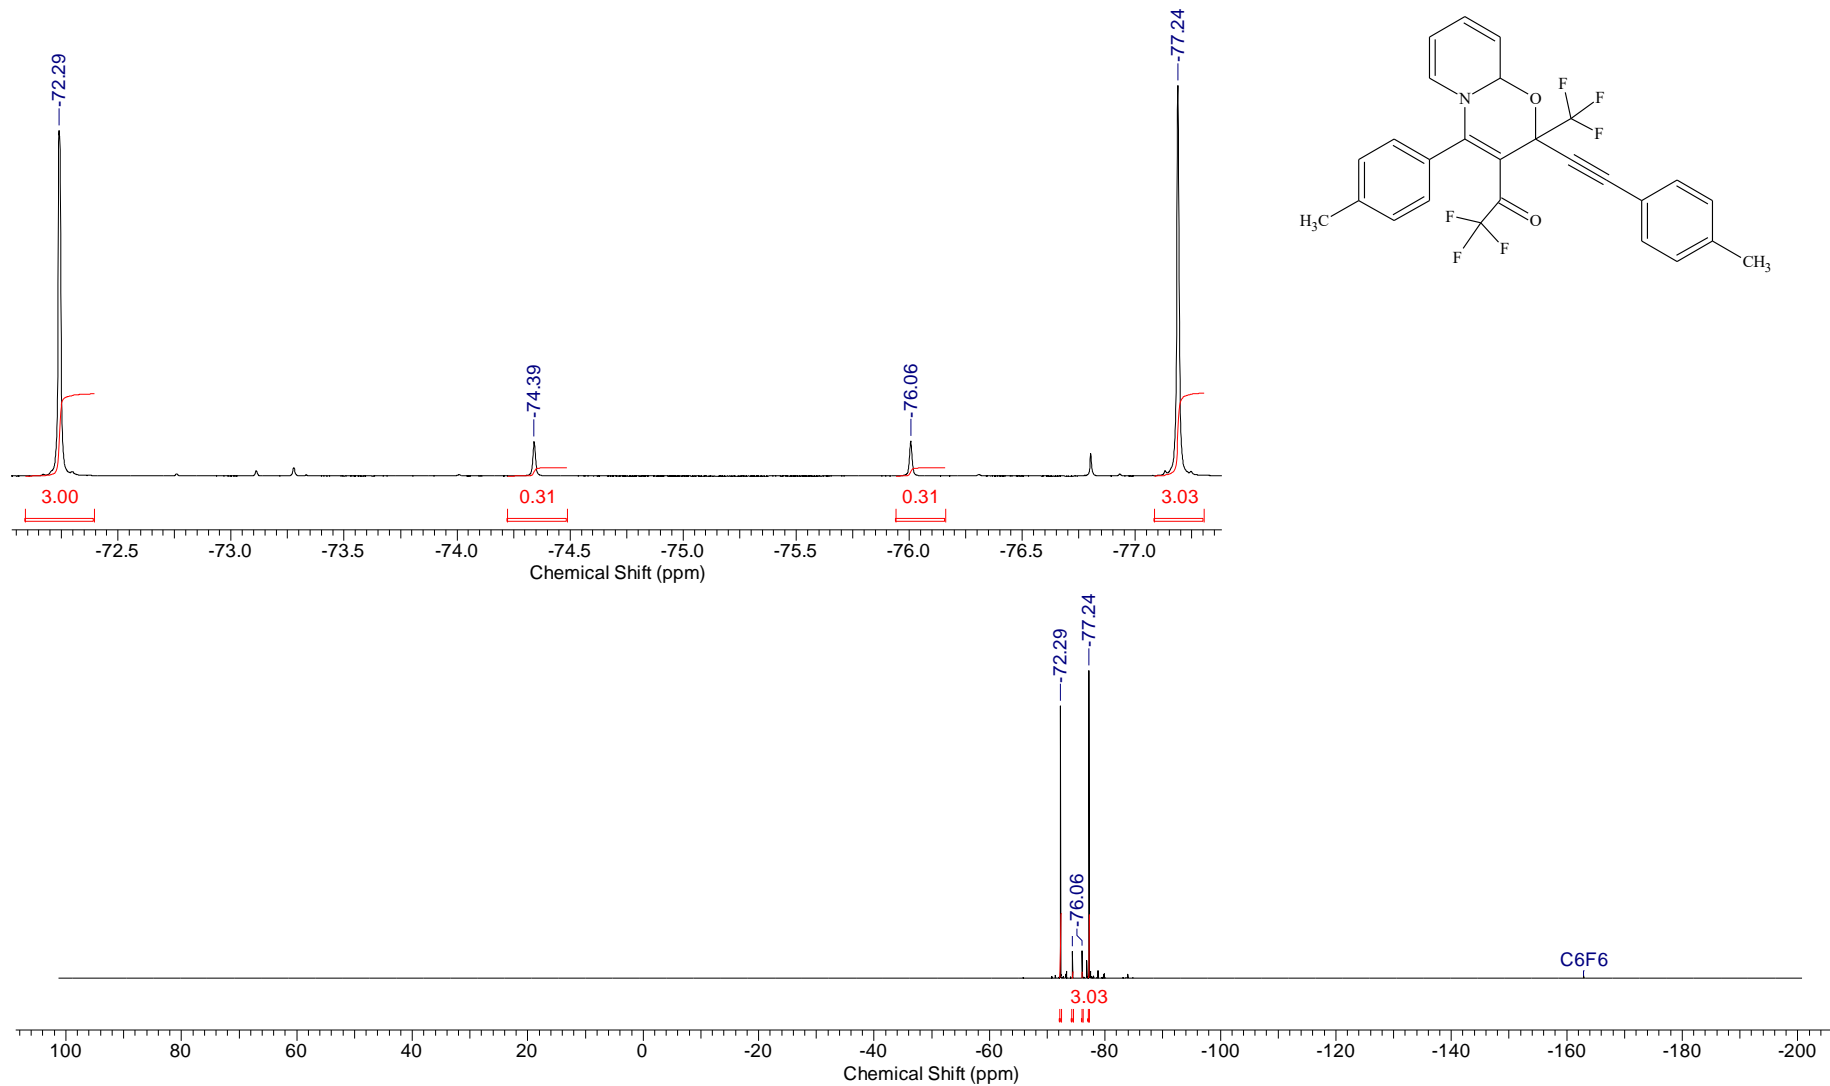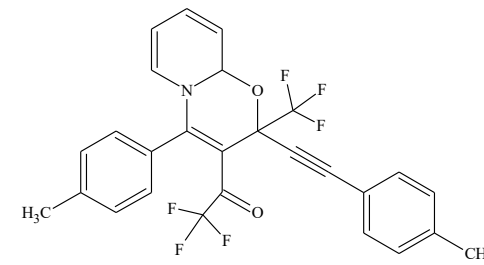

|                               |                                                 |                              |                      |                               |                      |
|-------------------------------|-------------------------------------------------|------------------------------|----------------------|-------------------------------|----------------------|
| <b>Acquisition Time (sec)</b> | 2.5559                                          | <b>Comment</b>               | Imported from UXNMR. | <b>Date</b>                   | 10 Nov 2018 13:34:36 |
| <b>File Name</b>              | C:\DOCS\BMSPEC_H.C_I-XII.2018\BM-1429.H_001001r | <b>Frequency (MHz)</b>       | 400.13               | <b>Nucleus</b>                | 1H                   |
| <b>Number of Transients</b>   | 8                                               | <b>Original Points Count</b> | 16384                | <b>Points Count</b>           | 65536                |
| <b>Solvent</b>                | ACETONITRILE-D3                                 | <b>Sweep Width (Hz)</b>      | 6410.26              | <b>Pulse Sequence</b>         | zg30                 |
|                               |                                                 |                              |                      | <b>Temperature (degree C)</b> | 27.000               |

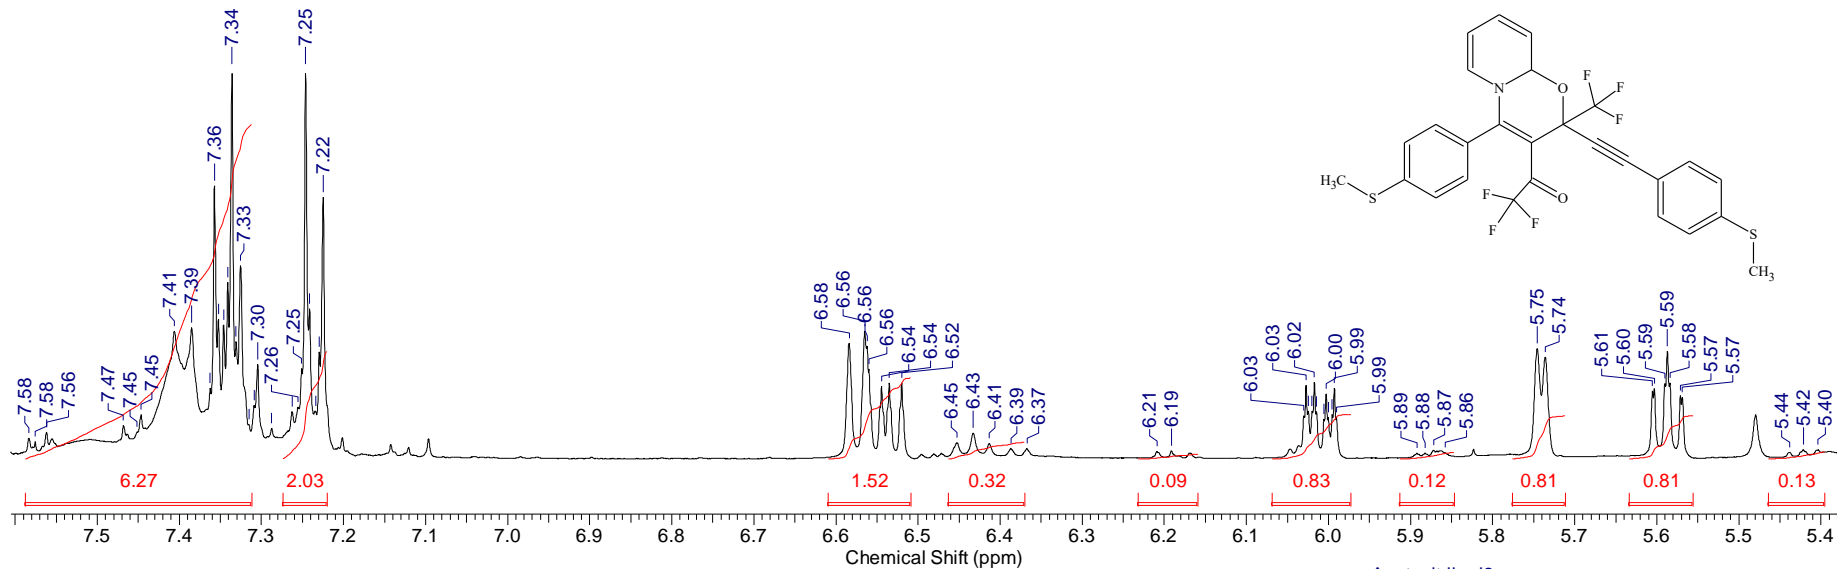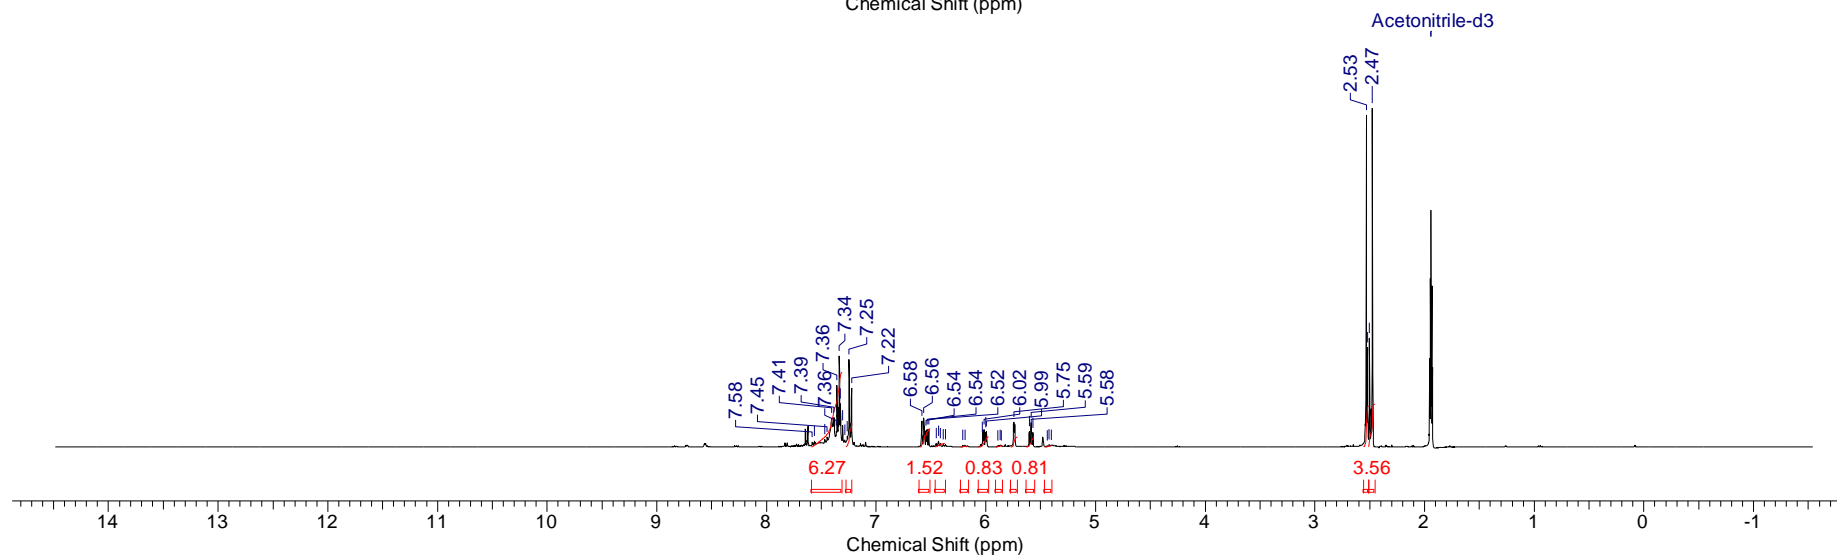

$^1\text{H}$  NMR spectrum of **3g** (400.1 MHz,  $\text{CD}_3\text{CN}$ )

|                               |                                                        |                              |                      |                         |                      |
|-------------------------------|--------------------------------------------------------|------------------------------|----------------------|-------------------------|----------------------|
| <b>Acquisition Time (sec)</b> | 4.0894                                                 | <b>Comment</b>               | Imported from UXMNR. | <b>Date</b>             | 30 Oct 2018 21:06:58 |
| <b>File Name</b>              | C:\DOCS\BM\SPEC_H.C I-XII.2018\BM-1421\BM-1421_001001r | <b>Number of Transients</b>  | 8                    | <b>Frequency (MHz)</b>  | 400.13               |
| <b>Nucleus</b>                | <sup>1</sup> H                                         | <b>Original Points Count</b> | 32768                | <b>Points Count</b>     | 131072               |
| <b>Pulse Sequence</b>         | zg30                                                   | <b>Solvent</b>               | CHLOROFORM-D         | <b>Sweep Width (Hz)</b> | 8012.82              |
| <b>Temperature (degree C)</b> | 27.000                                                 |                              |                      |                         |                      |

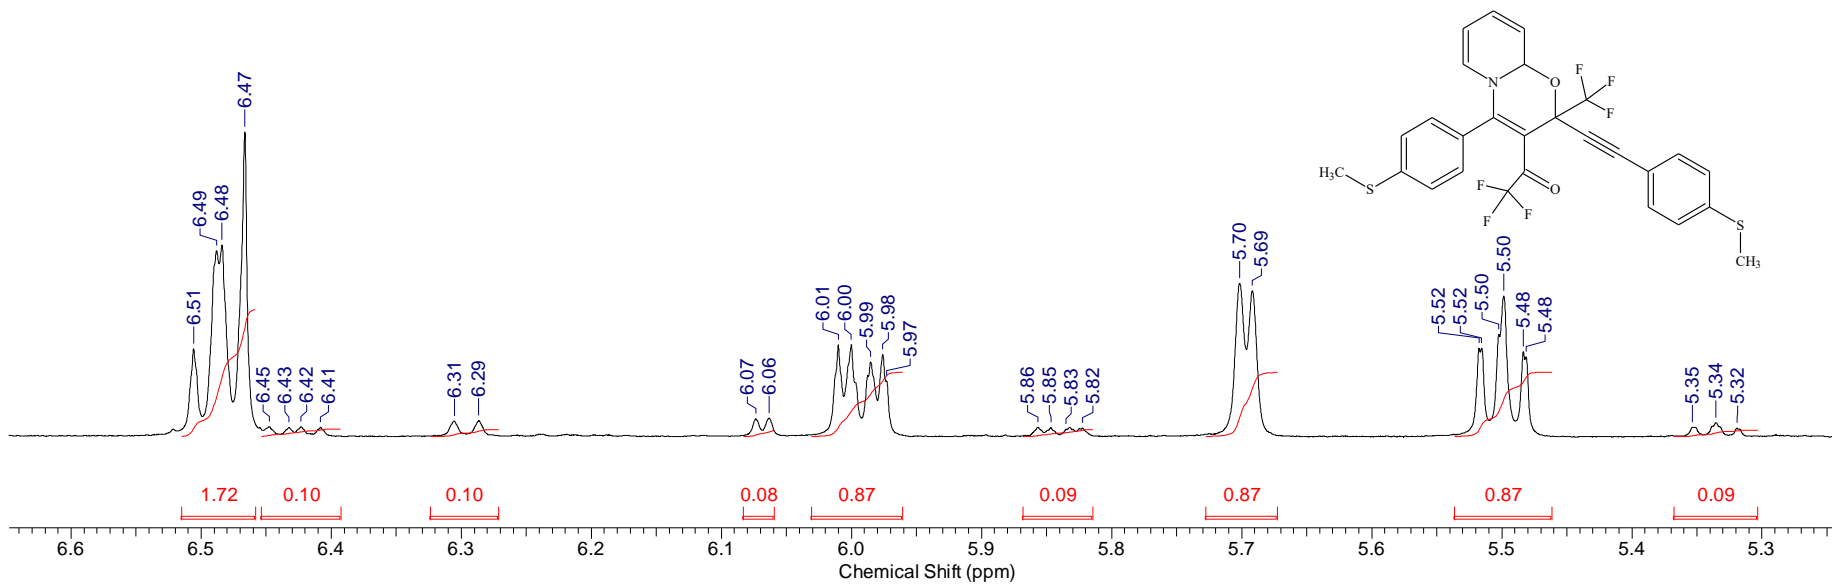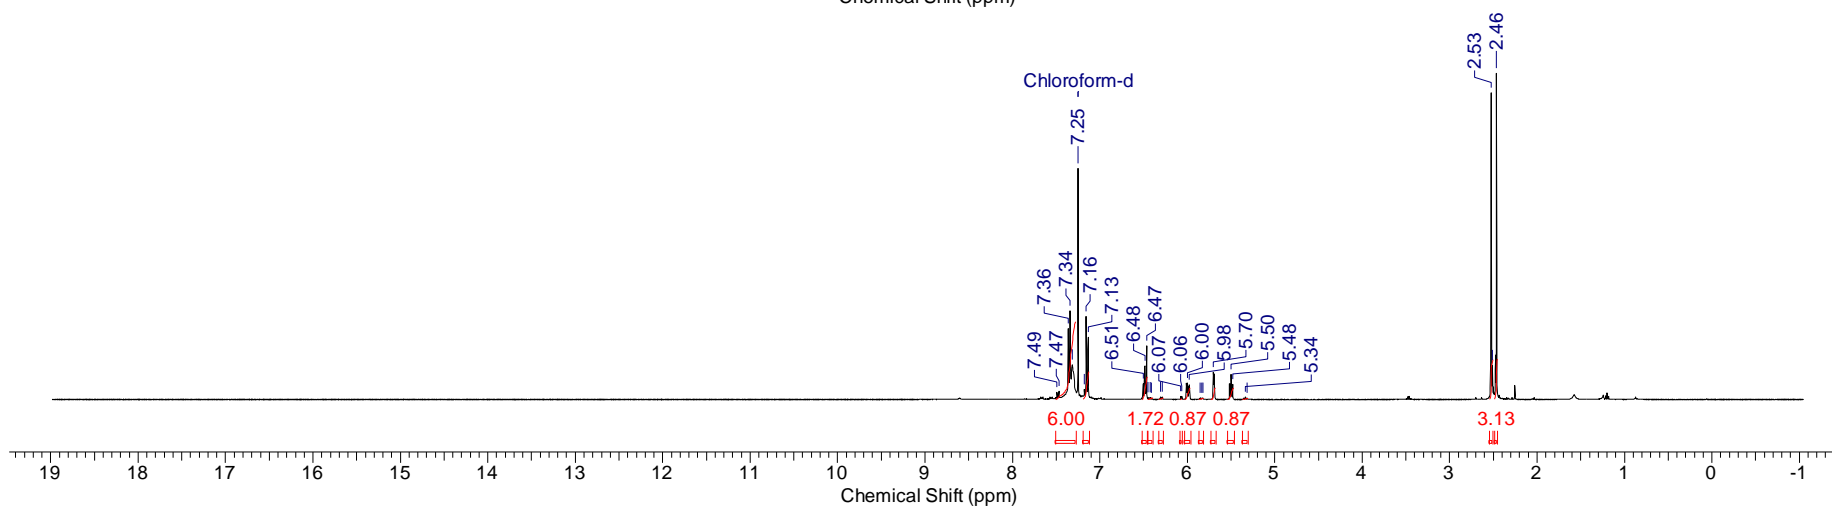

<sup>1</sup>H NMR spectrum of **3g** (400.1 MHz, CDCl<sub>3</sub>)

|                               |                                                  |                              |                      |                               |                      |
|-------------------------------|--------------------------------------------------|------------------------------|----------------------|-------------------------------|----------------------|
| <b>Acquisition Time (sec)</b> | 0.6783                                           | <b>Comment</b>               | Imported from UXMNR. | <b>Date</b>                   | 12 Nov 2018 15:20:40 |
| <b>File Name</b>              | C:\DOCS\BM\SPEC_H.C I-XII.2018\BM-1429.C_002001r | <b>Frequency (MHz)</b>       | 100.61               | <b>Nucleus</b>                | <sup>13</sup> C      |
| <b>Number of Transients</b>   | 1025                                             | <b>Original Points Count</b> | 16384                | <b>Points Count</b>           | 131072               |
| <b>Solvent</b>                | ACETONITRILE-D3                                  | <b>Sweep Width (Hz)</b>      | 24154.59             | <b>Pulse Sequence</b>         | zpgpg30              |
|                               |                                                  |                              |                      | <b>Temperature (degree C)</b> | 27.000               |

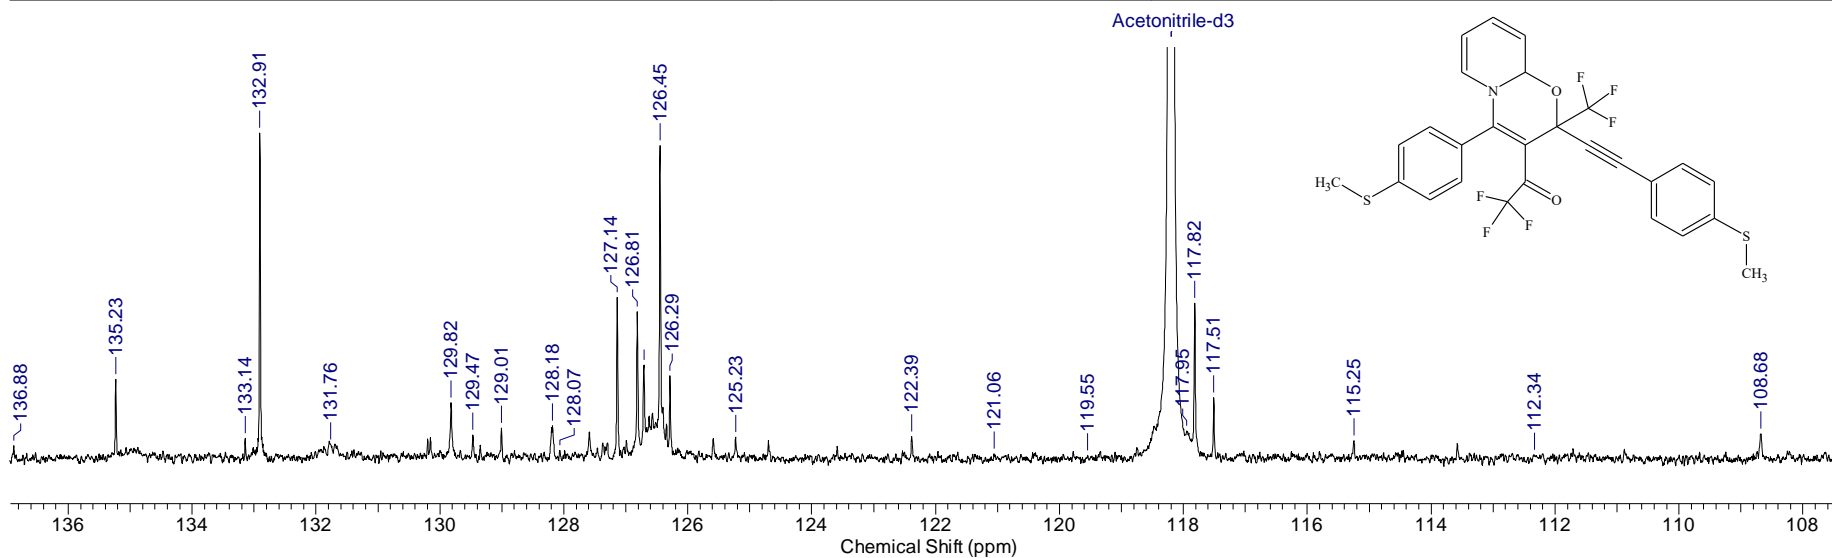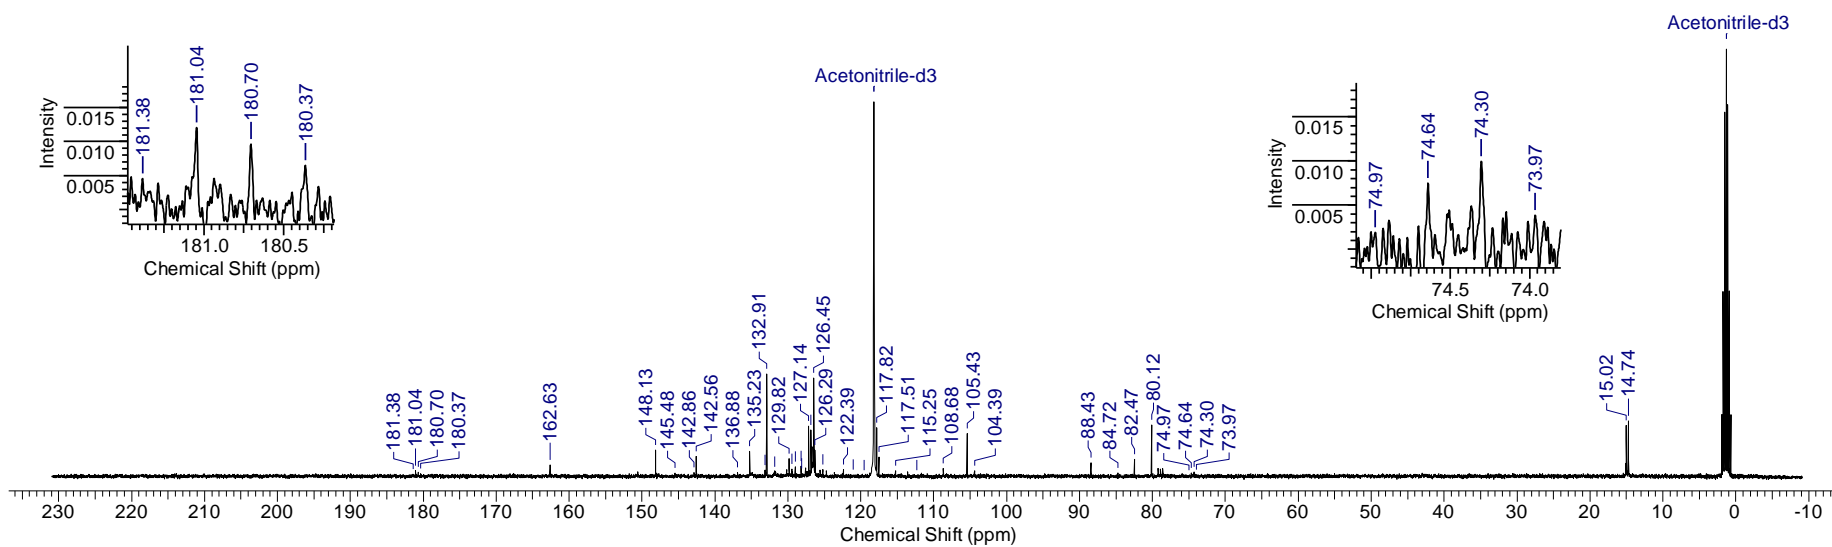

<sup>13</sup>C NMR spectrum of **3g** (100.6 MHz, CD<sub>3</sub>CN)

|                        |          |                        |            |                      |                                                                 |                             |
|------------------------|----------|------------------------|------------|----------------------|-----------------------------------------------------------------|-----------------------------|
| Acquisition Time (sec) | 1.0000   | Date                   | Nov 9 2018 | File Name            | C:\DOCS\BM\SPEC_BM_F_2018.12.25\BM-1429_20181109_01\FLUORINE_01 |                             |
| Frequency (MHz)        | 376.31   | Nucleus                | 19F        | Number of Transients | 16                                                              | Original Points Count 89286 |
| Points Count           | 131072   | Pulse Sequence         | s2pul      | Solvent              | ACETONITRILE-D3                                                 |                             |
| Sweep Width (Hz)       | 89285.71 | Temperature (degree C) | 22.000     |                      |                                                                 |                             |

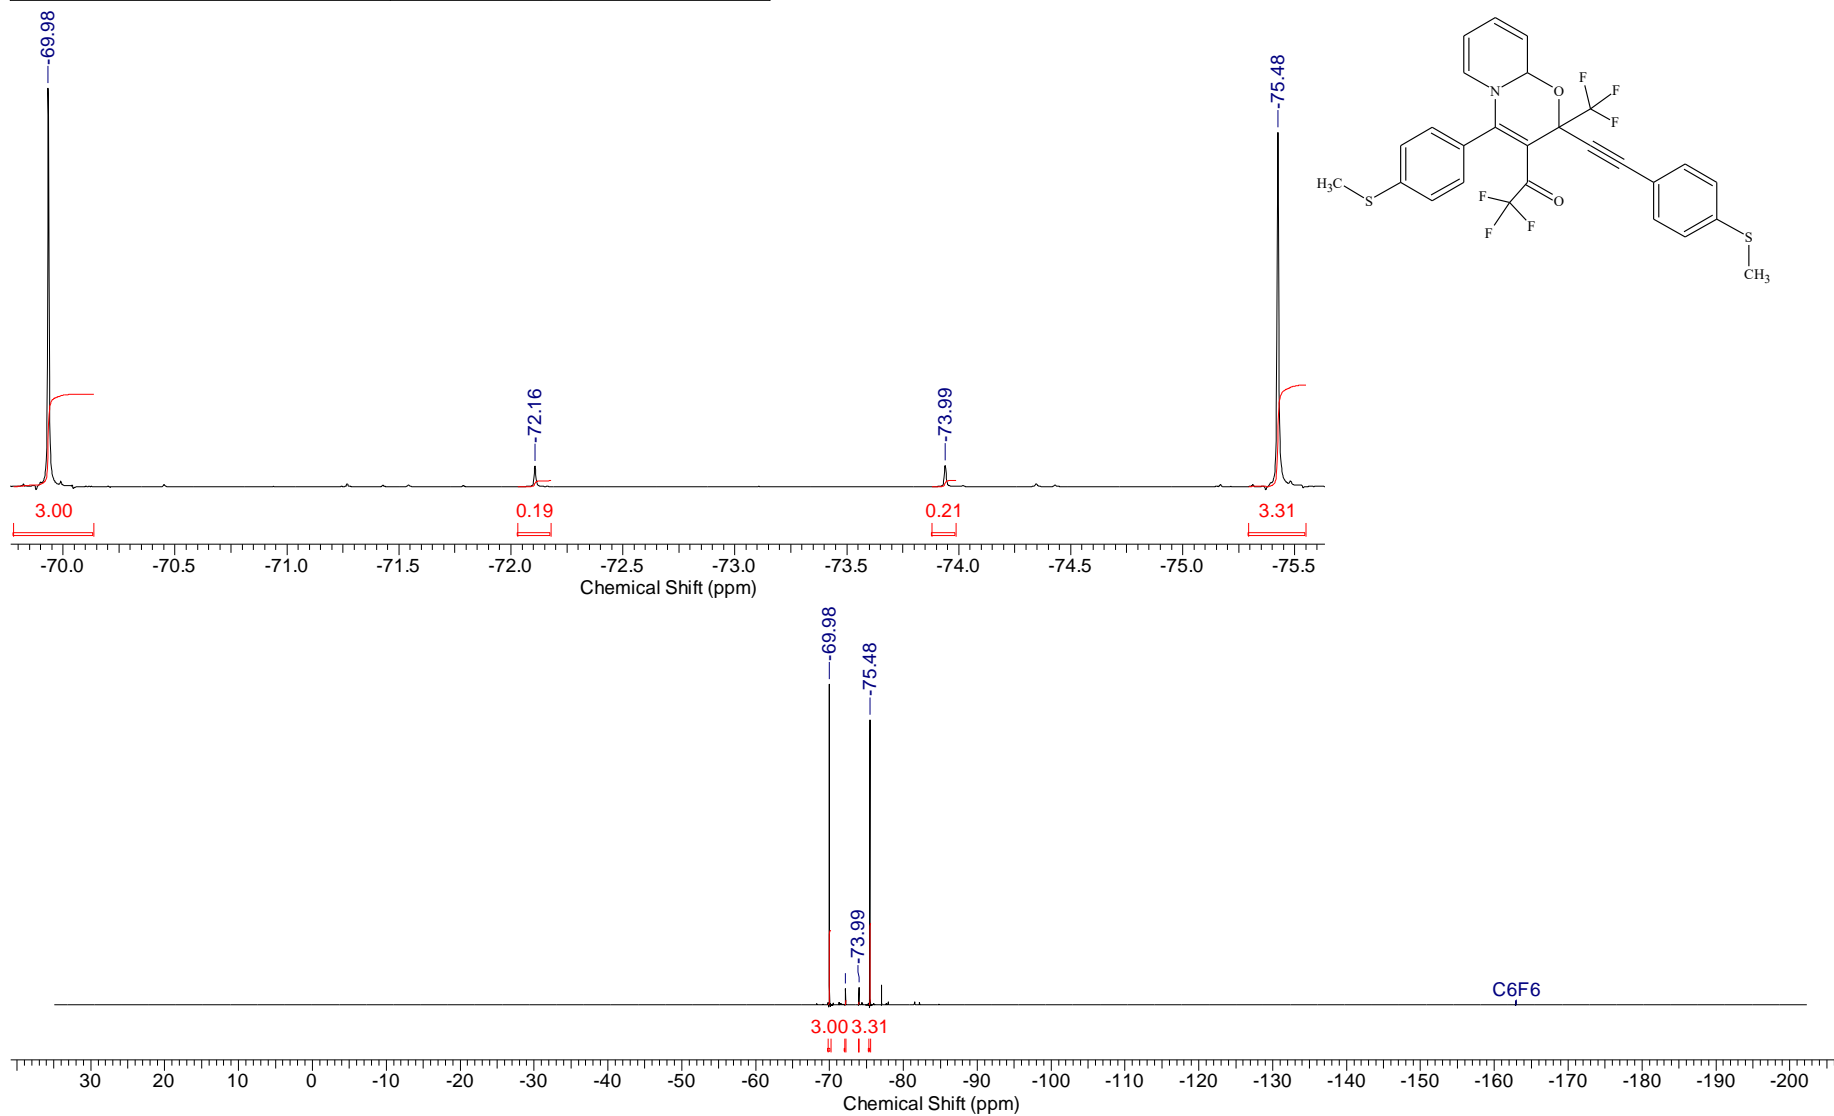

|                        |          |                        |            |                      |                                                                 |                              |
|------------------------|----------|------------------------|------------|----------------------|-----------------------------------------------------------------|------------------------------|
| Acquisition Time (sec) | 2.0000   | Date                   | Nov 1 2018 | File Name            | C:\DOCS\BM\SPEC_BM_F_2018.12.25\BM-1421_20181101_01\FLUORINE_01 |                              |
| Frequency (MHz)        | 376.31   | Nucleus                | 19F        | Number of Transients | 16                                                              | Original Points Count 178571 |
| Points Count           | 262144   | Pulse Sequence         | s2pul      | Solvent              | CHLOROFORM-D                                                    |                              |
| Sweep Width (Hz)       | 89285.71 | Temperature (degree C) | 22.000     |                      |                                                                 |                              |

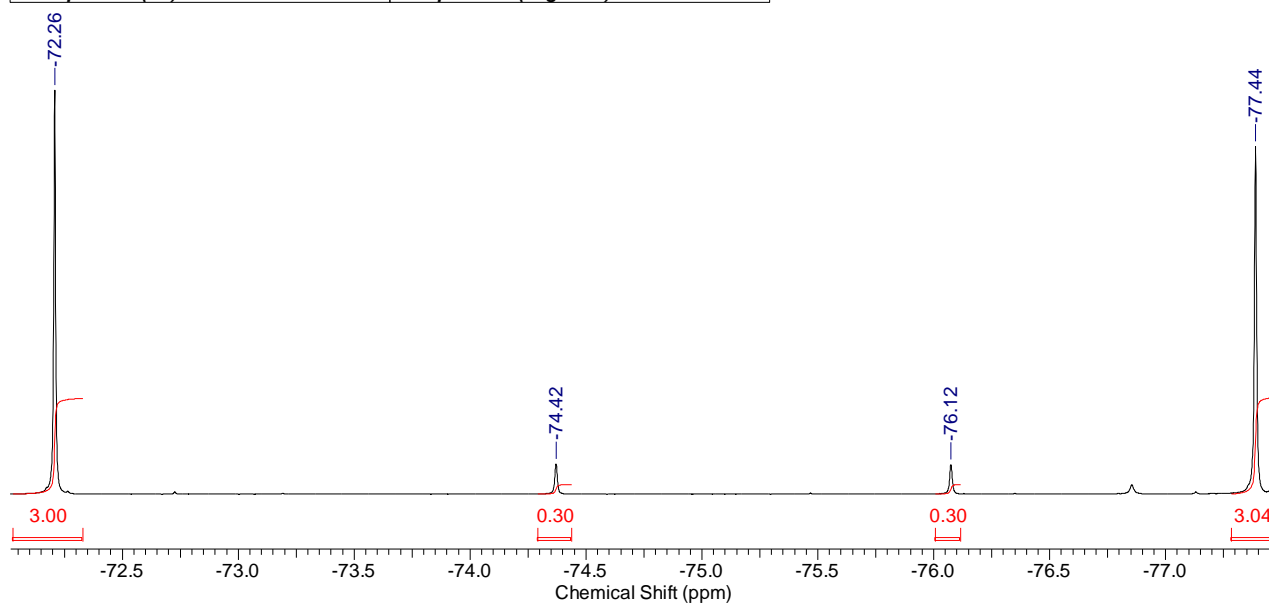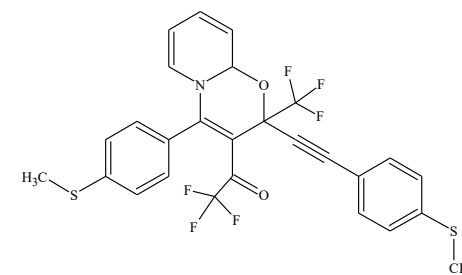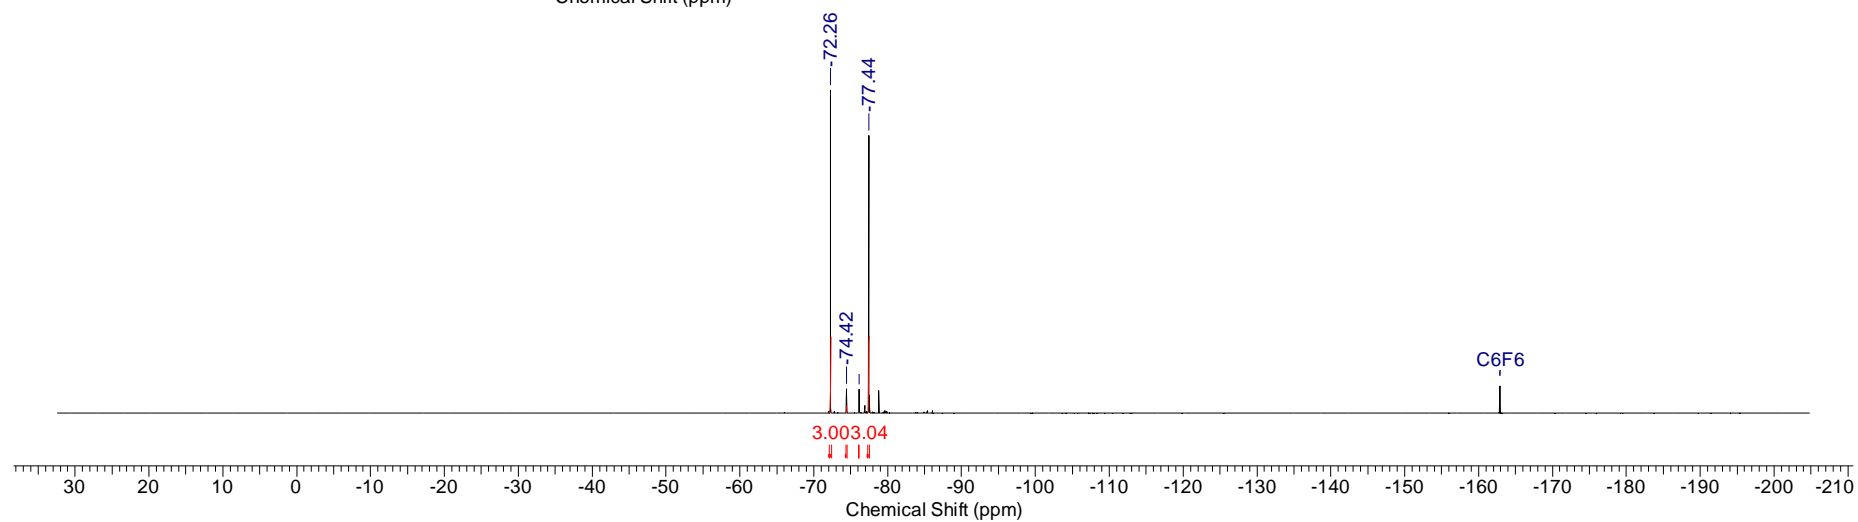

$^{19}\text{F}$  NMR spectrum of **3g** (376.3 MHz,  $\text{CDCl}_3$ )

|                               |                                               |                              |                      |                               |                      |
|-------------------------------|-----------------------------------------------|------------------------------|----------------------|-------------------------------|----------------------|
| <b>Acquisition Time (sec)</b> | 2.5559                                        | <b>Comment</b>               | Imported from UXNMR. | <b>Date</b>                   | 31 Oct 2018 17:11:36 |
| <b>File Name</b>              | C:\BM_DATA\DOCS\SPEC_BM_H_C\BM-1424.H_001001r | <b>Frequency (MHz)</b>       | 400.13               | <b>Nucleus</b>                | 1H                   |
| <b>Number of Transients</b>   | 5                                             | <b>Original Points Count</b> | 16384                | <b>Points Count</b>           | 65536                |
| <b>Solvent</b>                | CHLOROFORM-D                                  | <b>Sweep Width (Hz)</b>      | 6410.26              | <b>Pulse Sequence</b>         | zg30                 |
|                               |                                               |                              |                      | <b>Temperature (degree C)</b> | 27.000               |

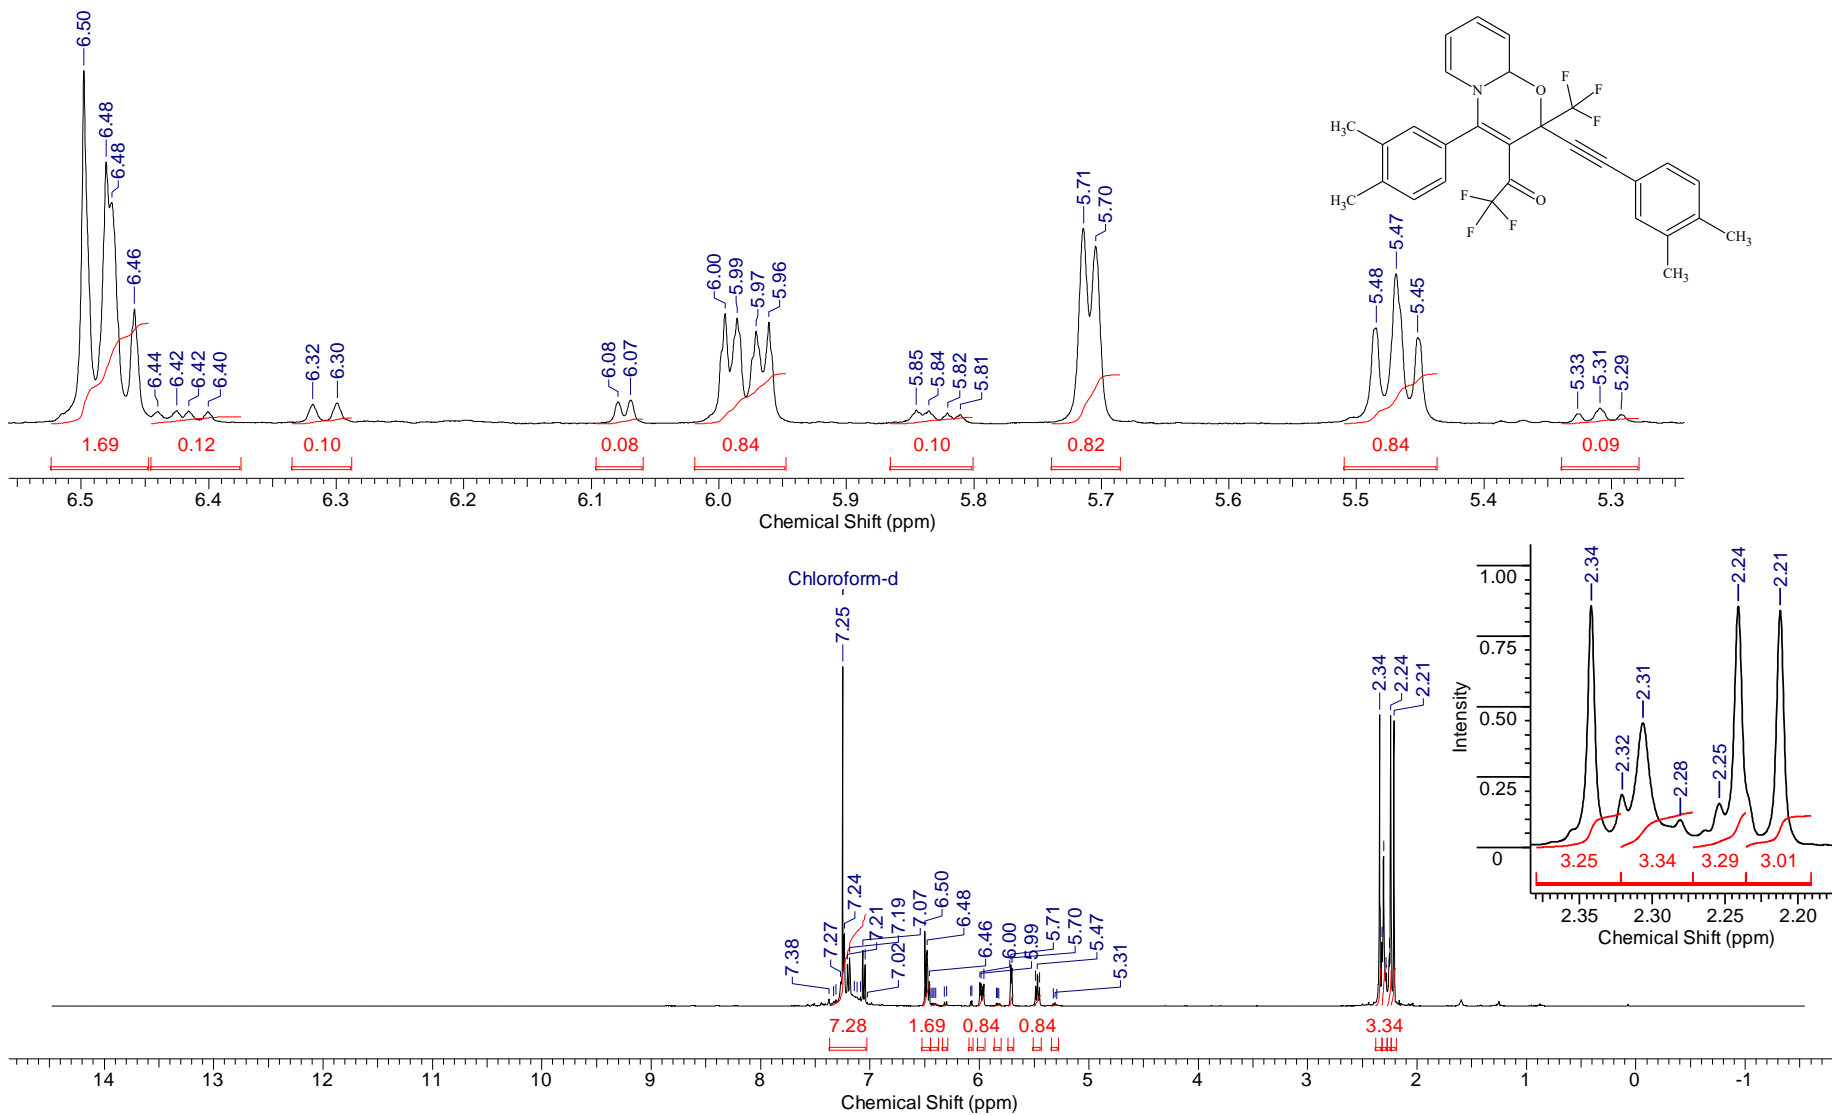

|                               |                                                 |                              |                      |                               |                      |
|-------------------------------|-------------------------------------------------|------------------------------|----------------------|-------------------------------|----------------------|
| <b>Acquisition Time (sec)</b> | 0.4999                                          | <b>Comment</b>               | Imported from UXNMR. | <b>Date</b>                   | 13 Nov 2018 15:22:52 |
| <b>File Name</b>              | C:\BM_DATA\DOCS\SPEC_BM_H,C\BM-1424-C.C_002001r | <b>Number of Transients</b>  | 839                  | <b>Frequency (MHz)</b>        | 100.61               |
| <b>Nucleus</b>                | 13C                                             | <b>Original Points Count</b> | 12076                | <b>Points Count</b>           | 65536                |
| <b>Pulse Sequence</b>         | zgpg30                                          | <b>Solvent</b>               | DMSO-D6              | <b>Sweep Width (Hz)</b>       | 24154.59             |
|                               |                                                 |                              |                      | <b>Temperature (degree C)</b> | 27.000               |

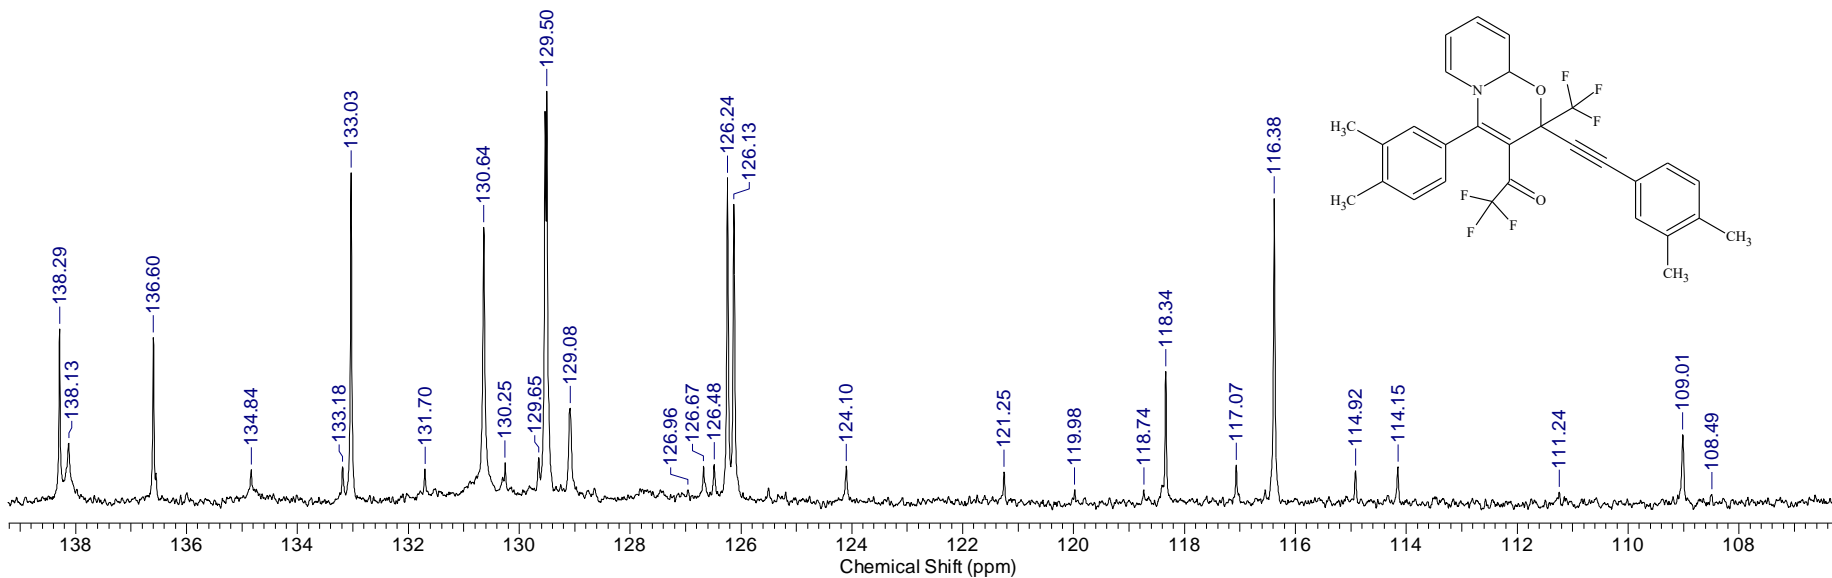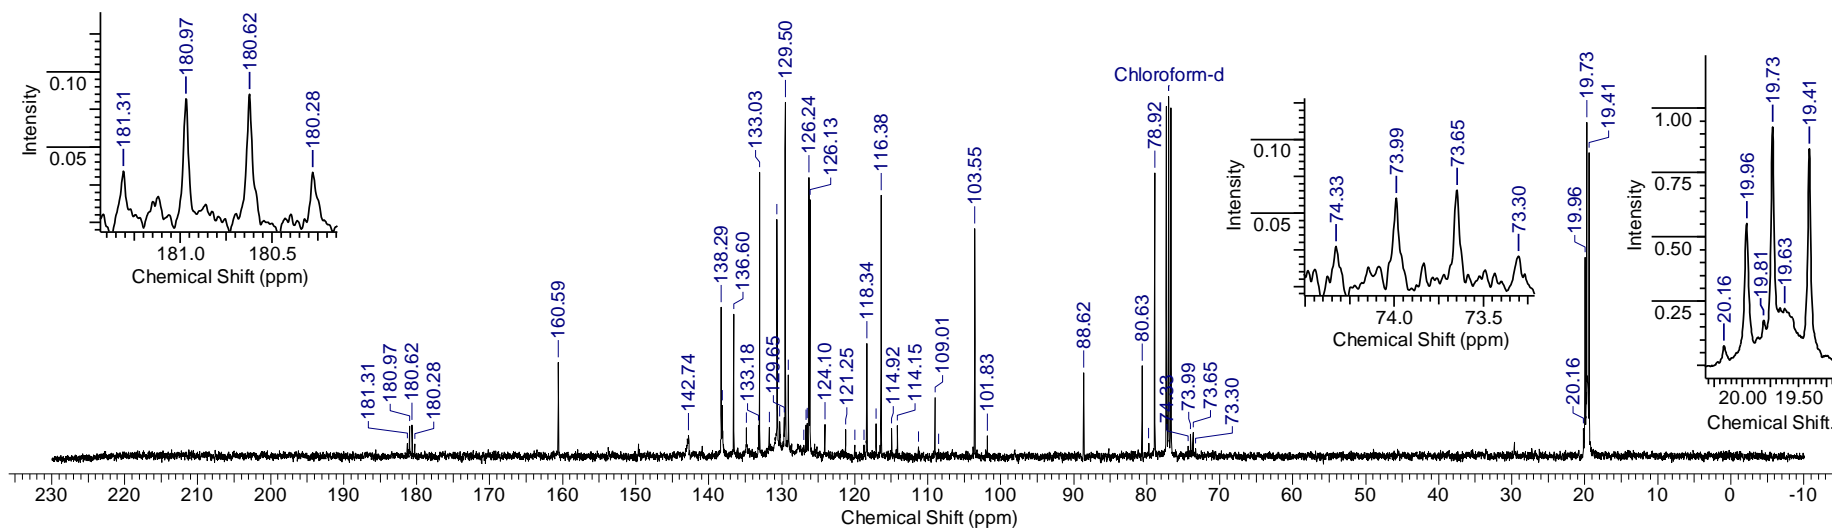

$^{13}\text{C}$  NMR spectrum of **3h** (100.6 MHz,  $\text{CDCl}_3$ )



|    |          |         |                                                                |
|----|----------|---------|----------------------------------------------------------------|
| FW | 531.4889 | Formula | C <sub>29</sub> H <sub>23</sub> F <sub>6</sub> NO <sub>2</sub> |
|----|----------|---------|----------------------------------------------------------------|

|                        |                                               |                       |                      |                        |        |                      |
|------------------------|-----------------------------------------------|-----------------------|----------------------|------------------------|--------|----------------------|
| Acquisition Time (sec) | 1.3664                                        | Comment               | Imported from UXMNR. |                        | Date   | 13 Nov 2018 21:24:44 |
| File Name              | C:\BM_DATA\DOCS\SPEC_BM_H_C\BM-1424-C_004001r | Frequency (MHz)       | 100.61               | Nucleus                | 13C    |                      |
| Number of Transients   | 68                                            | Original Points Count | 32768                | Points Count           | 131072 |                      |
| Solvent                | CHLOROFORM-D                                  | Sweep Width (Hz)      | 23980.81             | Pulse Sequence         | jmod   |                      |
|                        |                                               |                       |                      | Temperature (degree C) | 27.000 |                      |

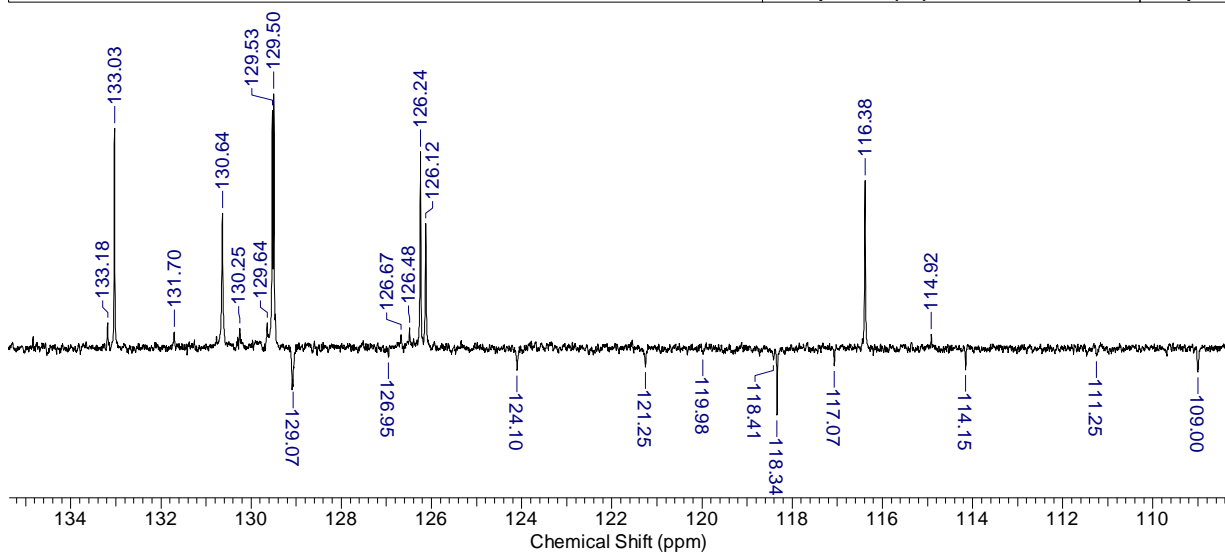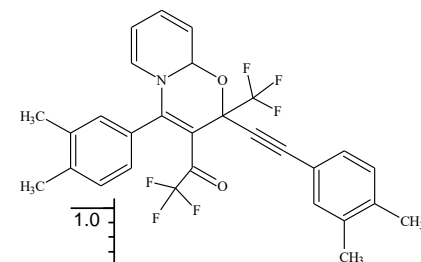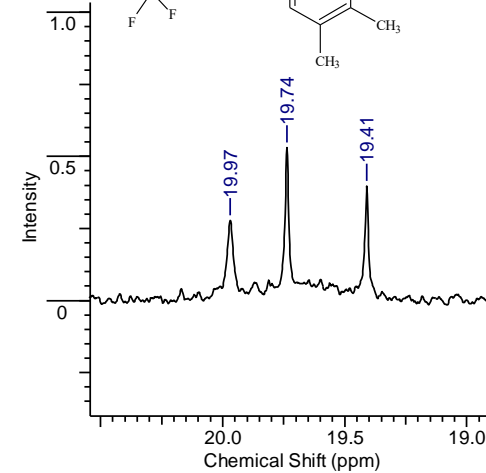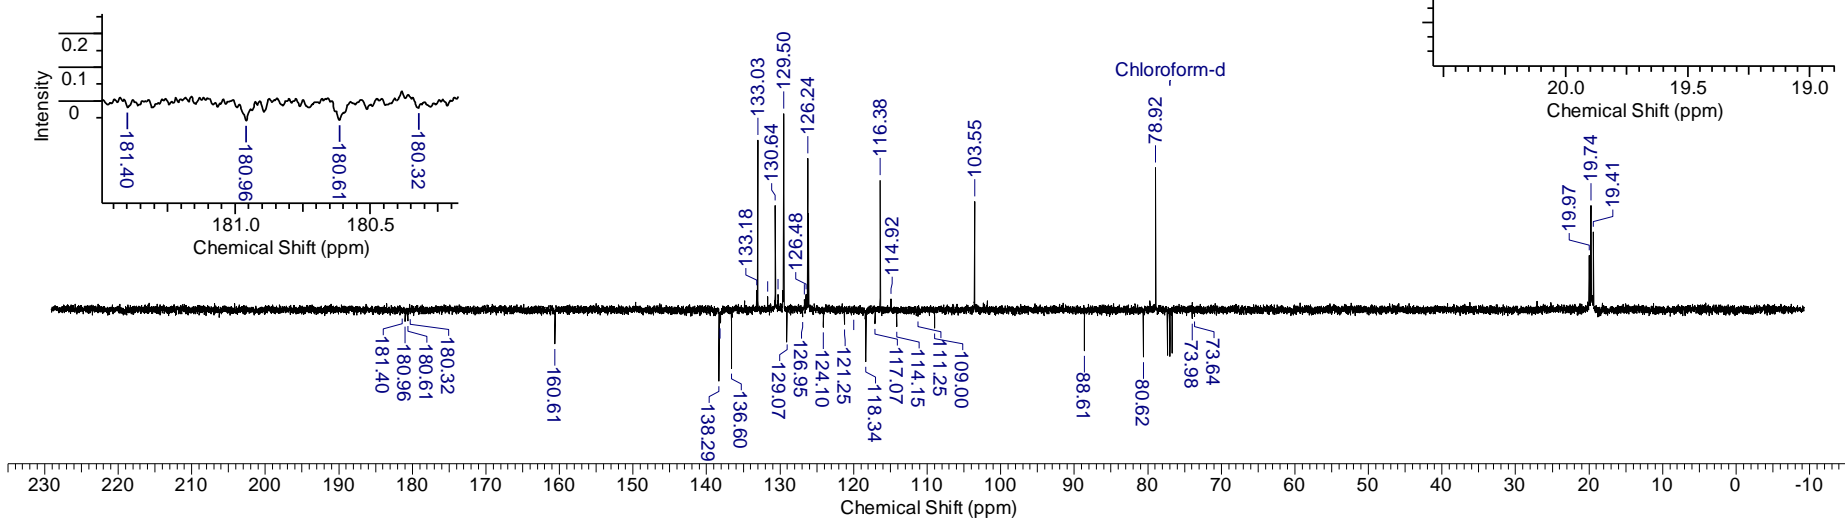

<sup>13</sup>C APT NMR spectrum of **3h** (100.6 MHz, CDCl<sub>3</sub>)

|                        |          |                        |            |                       |                                                                             |
|------------------------|----------|------------------------|------------|-----------------------|-----------------------------------------------------------------------------|
| Acquisition Time (sec) | 2.0000   | Date                   | Nov 1 2018 | File Name             | F:\COMP_PRAK\DOCS\OUTPUT_301\F19\2018.11.01\BM-1424_20181101_01\FLUORINE_01 |
| Frequency (MHz)        | 376.31   | Nucleus                | 19F        | Number of Transients  | 16                                                                          |
| Points Count           | 262144   | Pulse Sequence         | s2pul      | Original Points Count | 178571                                                                      |
| Sweep Width (Hz)       | 89285.71 | Temperature (degree C) | 22.000     | Solvent               | CHLOROFORM-D                                                                |

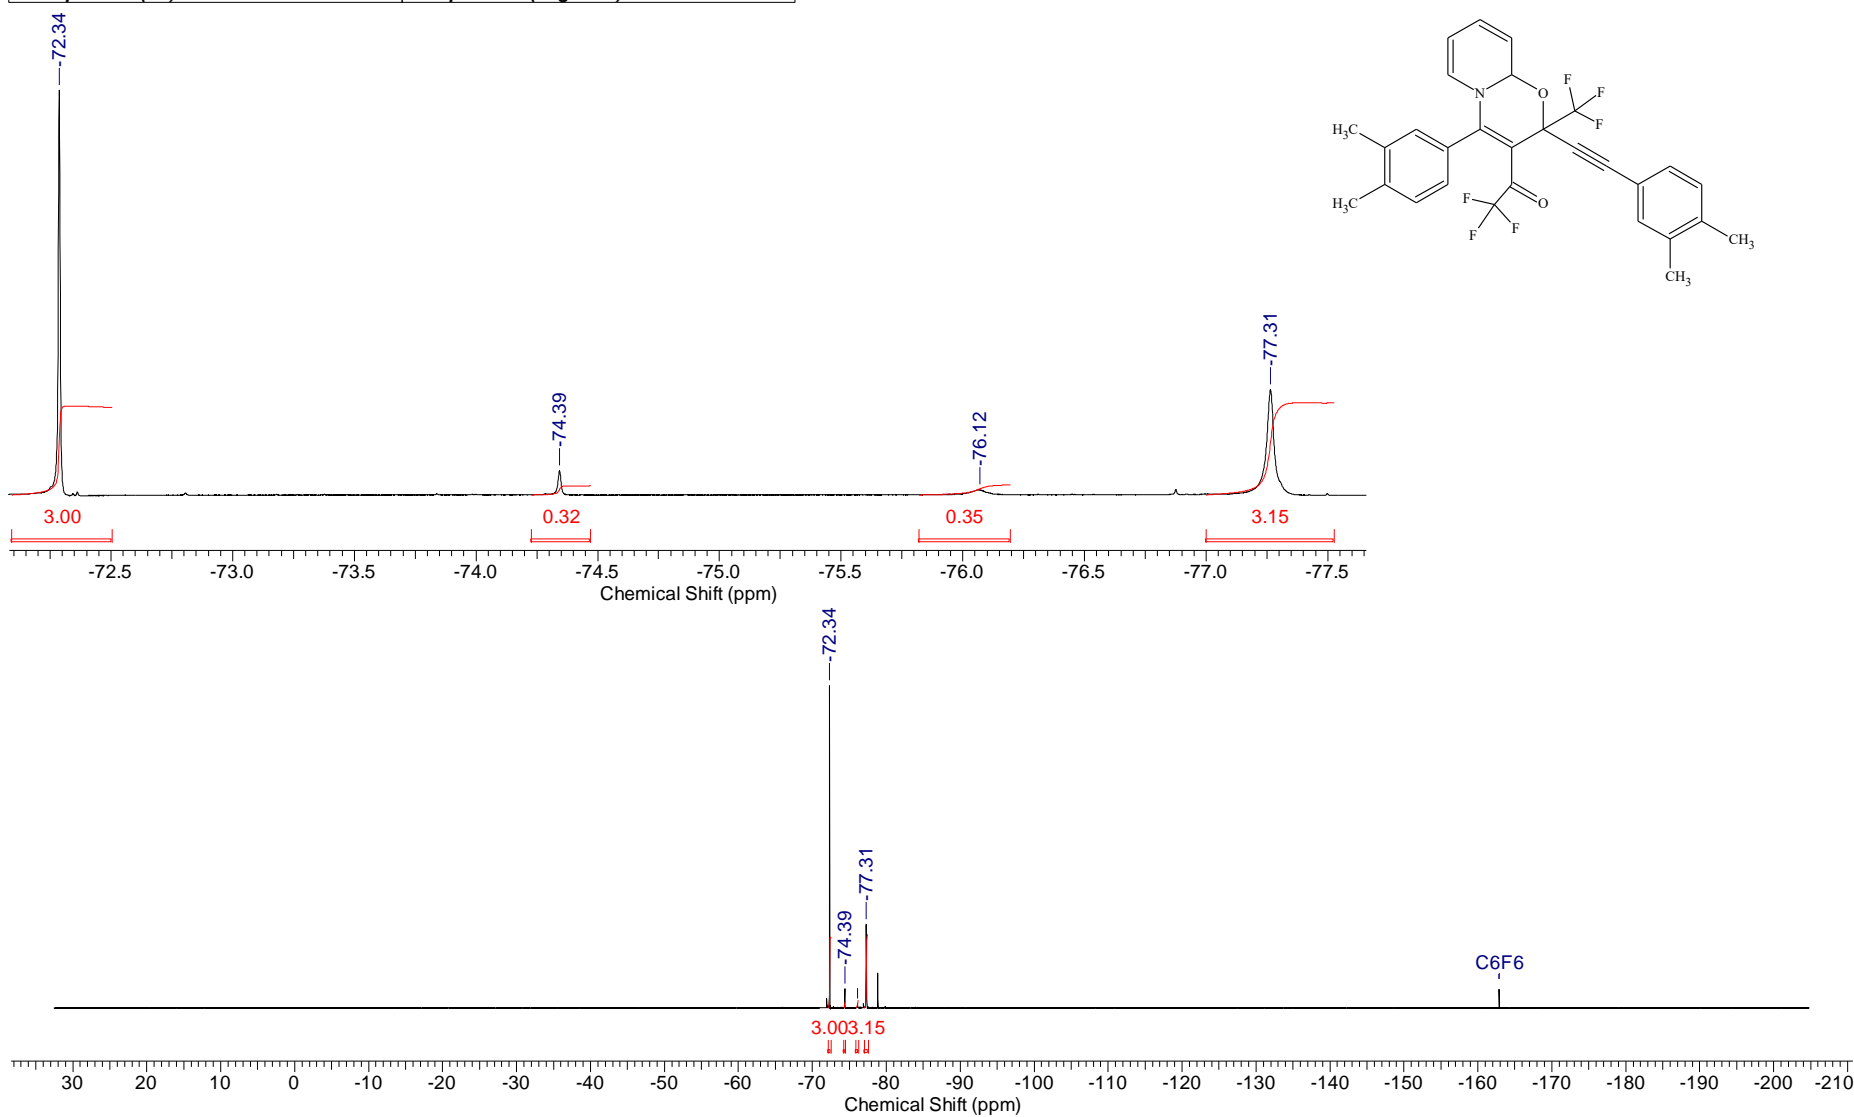

$^{19}\text{F}$  NMR spectrum of **3h** (376.3 MHz,  $\text{CDCl}_3$ )

FW 635.5519 Formula C<sub>35</sub>H<sub>23</sub>F<sub>6</sub>NO<sub>4</sub>

| Acquisition Time (sec) | 2.5559                                        | Comment                | Imported from UXNMR. |                | Date  | 31 Oct 2018 17:13:52 |
|------------------------|-----------------------------------------------|------------------------|----------------------|----------------|-------|----------------------|
| File Name              | C:\BM_DATA\DOCS\SPEC_BM_H.C\BM-1422.H_001001r | Frequency (MHz)        | 400.13               | Nucleus        | 1H    |                      |
| Number of Transients   | 7                                             | Original Points Count  | 16384                | Points Count   | 65536 |                      |
| Solvent                | CHLOROFORM-D                                  | Sweep Width (Hz)       | 6410.26              | Pulse Sequence | zg30  |                      |
|                        |                                               | Temperature (degree C) | 27.000               |                |       |                      |

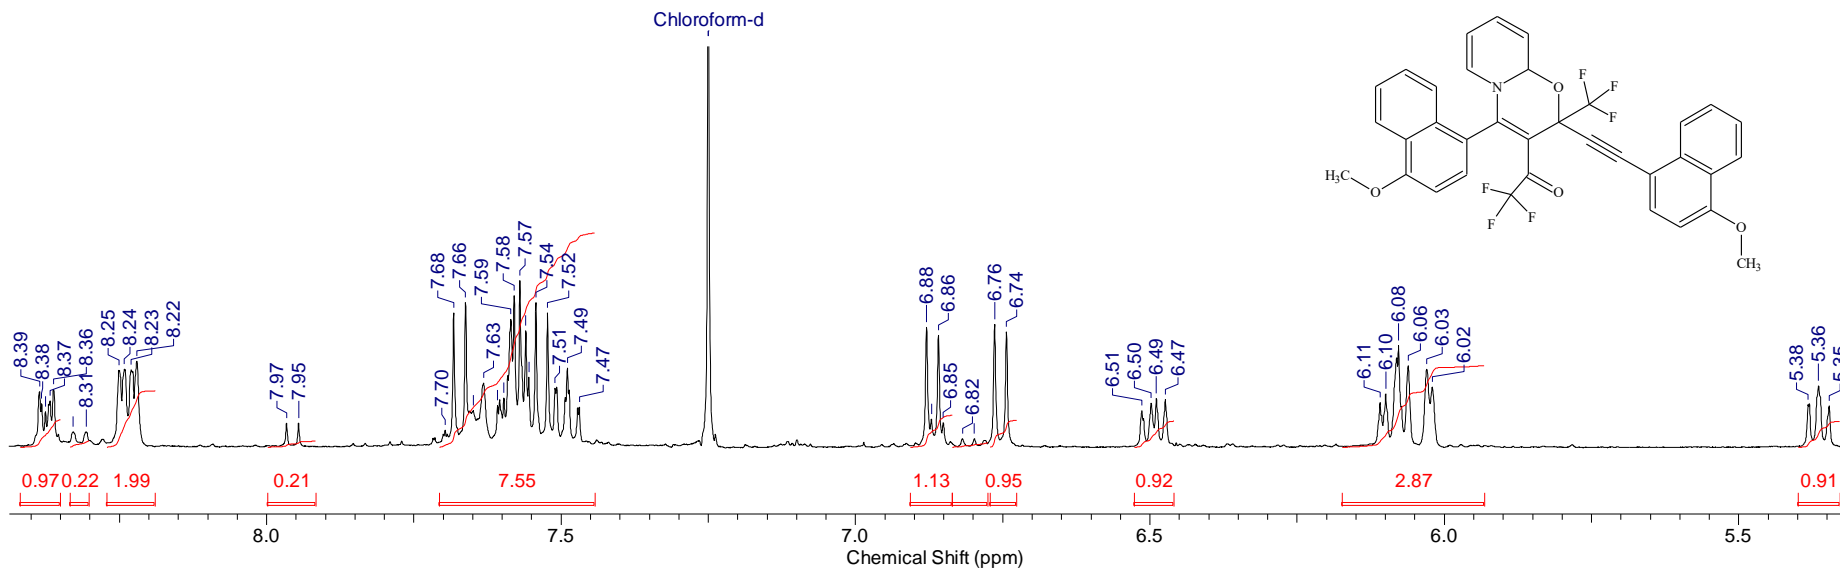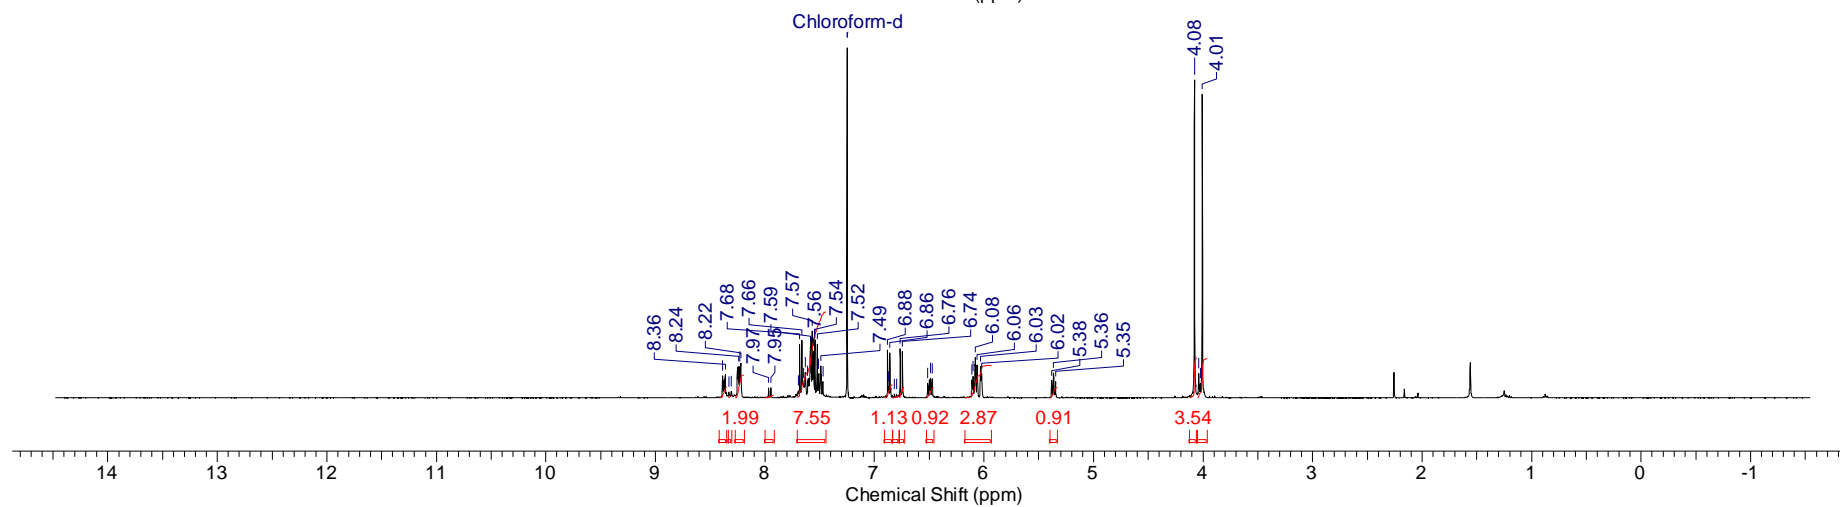

<sup>1</sup>H NMR spectrum of **3i** (400.1 MHz, CDCl<sub>3</sub>)

|           |          |                |                                                                |
|-----------|----------|----------------|----------------------------------------------------------------|
| <b>FW</b> | 635.5519 | <b>Formula</b> | C <sub>35</sub> H <sub>23</sub> F <sub>6</sub> NO <sub>4</sub> |
|-----------|----------|----------------|----------------------------------------------------------------|

|                               |                                                 |                             |                      |                              |             |                               |        |
|-------------------------------|-------------------------------------------------|-----------------------------|----------------------|------------------------------|-------------|-------------------------------|--------|
| <b>Acquisition Time (sec)</b> | 0.4999                                          | <b>Comment</b>              | Imported from UXNMR. |                              | <b>Date</b> | 13 Nov 2018 14:57:20          |        |
| <b>File Name</b>              | C:\BM_DATA\DOCS\SPEC_BM_H.C\BM-1422-C.C_002001r |                             |                      | <b>Frequency (MHz)</b>       | 100.61      |                               |        |
| <b>Nucleus</b>                | 13C                                             | <b>Number of Transients</b> | 1121                 | <b>Original Points Count</b> | 12076       | <b>Points Count</b>           | 65536  |
| <b>Pulse Sequence</b>         | zgpg30                                          | <b>Solvent</b>              | DMSO-D6              | <b>Sweep Width (Hz)</b>      | 24154.59    | <b>Temperature (degree C)</b> | 27.000 |

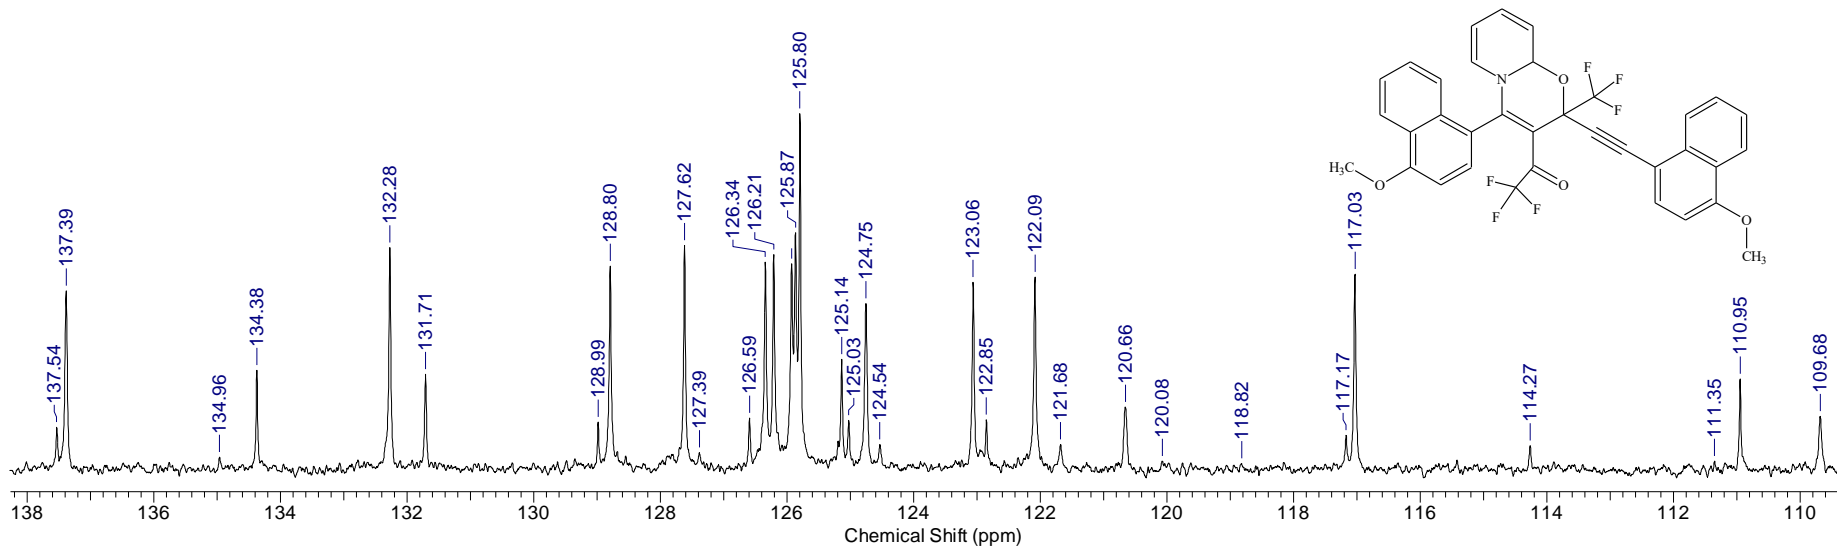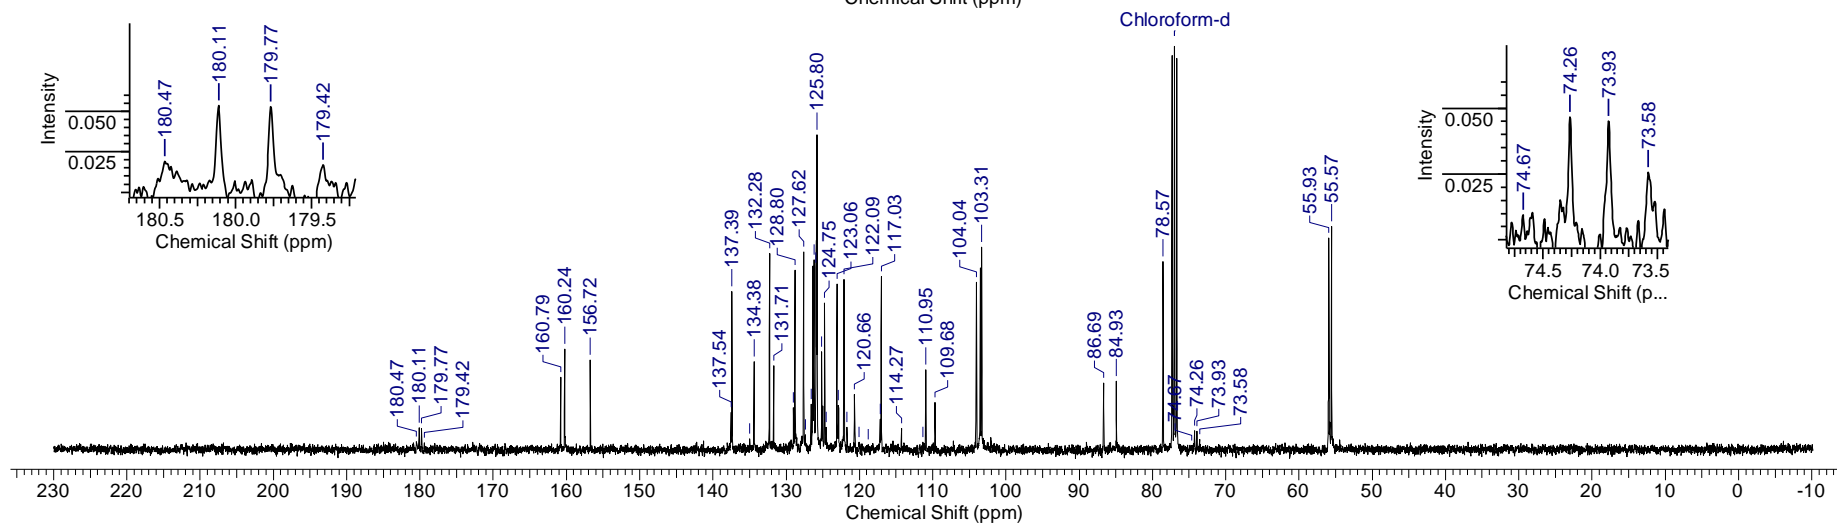

<sup>13</sup>C NMR spectrum of **3i** (100.6 MHz, CDCl<sub>3</sub>)

|    |          |         |                                                                |
|----|----------|---------|----------------------------------------------------------------|
| FW | 635.5519 | Formula | C <sub>35</sub> H <sub>23</sub> F <sub>6</sub> NO <sub>4</sub> |
|----|----------|---------|----------------------------------------------------------------|

|                        |                                                        |                      |                      |                       |                      |
|------------------------|--------------------------------------------------------|----------------------|----------------------|-----------------------|----------------------|
| Acquisition Time (sec) | 1.3664                                                 | Comment              | Imported from UXNMR. | Date                  | 13 Nov 2018 21:32:04 |
| File Name              | C:\BM_DATA\DOCS\SPEC_BM_H.C\bm181113\BM-1422-C_004001r |                      |                      | Frequency (MHz)       | 100.61               |
| Nucleus                | 13C                                                    | Number of Transients | 64                   | Original Points Count | 32768                |
| Pulse Sequence         | jmod                                                   | Solvent              | CHLOROFORM-D         | Points Count          | 131072               |
| Temperature (degree C) | 27.000                                                 |                      |                      | Sweep Width (Hz)      | 23980.81             |

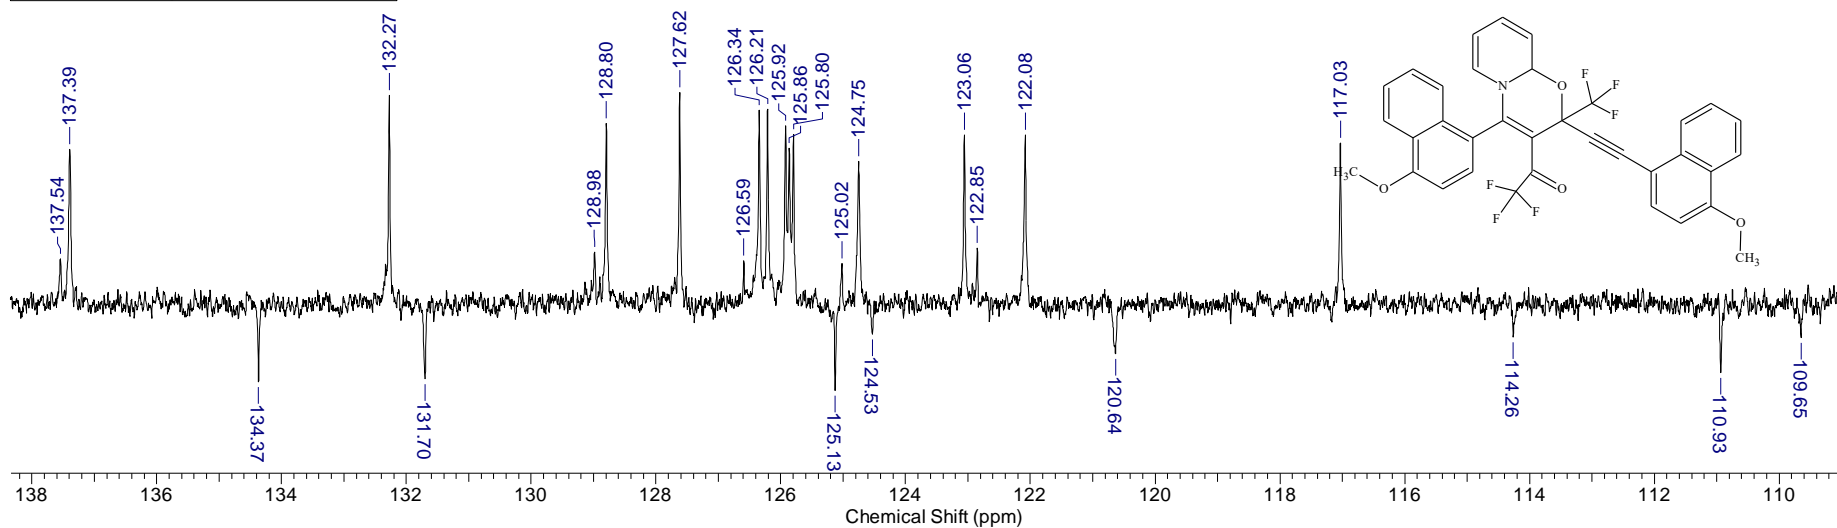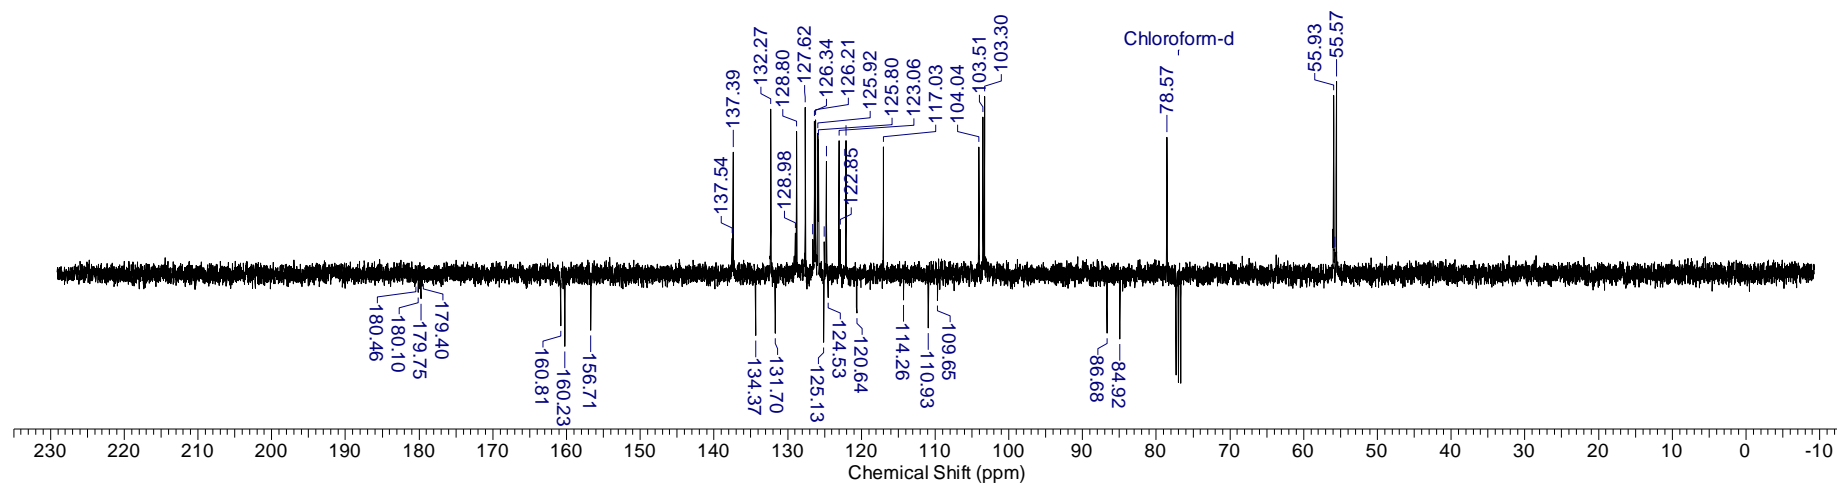

<sup>13</sup>C APT NMR spectrum of **3i** (100.6 MHz, CDCl<sub>3</sub>)

|           |          |                |                                                                |
|-----------|----------|----------------|----------------------------------------------------------------|
| <b>FW</b> | 635.5519 | <b>Formula</b> | C <sub>35</sub> H <sub>23</sub> F <sub>6</sub> NO <sub>4</sub> |
|-----------|----------|----------------|----------------------------------------------------------------|

|                               |          |                               |            |                             |                                                                             |                              |        |
|-------------------------------|----------|-------------------------------|------------|-----------------------------|-----------------------------------------------------------------------------|------------------------------|--------|
| <b>Acquisition Time (sec)</b> | 2.0000   | <b>Date</b>                   | Nov 1 2018 | <b>File Name</b>            | F:\COMP_PRAK\DOCS\OUTPUT_301\F19\2018.11.01\BM-1422_20181101_01\FLUORINE_01 |                              |        |
| <b>Frequency (MHz)</b>        | 376.31   | <b>Nucleus</b>                | 19F        | <b>Number of Transients</b> | 16                                                                          | <b>Original Points Count</b> | 178571 |
| <b>Points Count</b>           | 262144   | <b>Pulse Sequence</b>         | s2pul      | <b>Solvent</b>              | CHLOROFORM-D                                                                |                              |        |
| <b>Sweep Width (Hz)</b>       | 89285.71 | <b>Temperature (degree C)</b> | 22.000     |                             |                                                                             |                              |        |

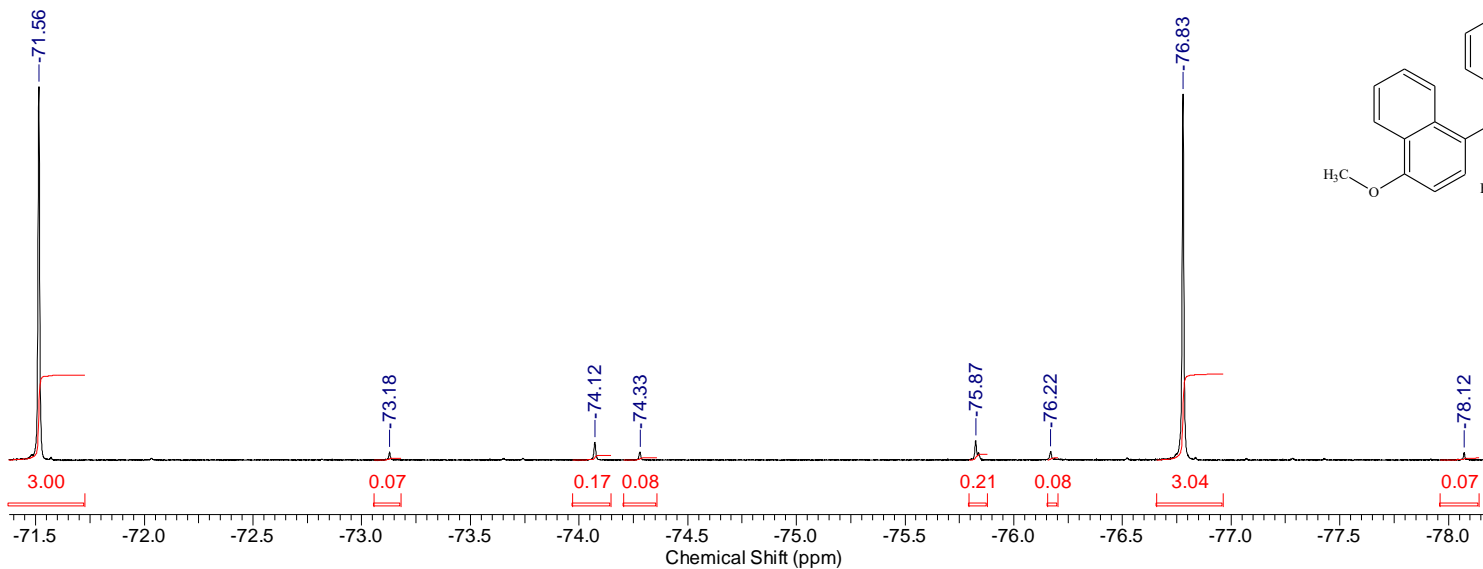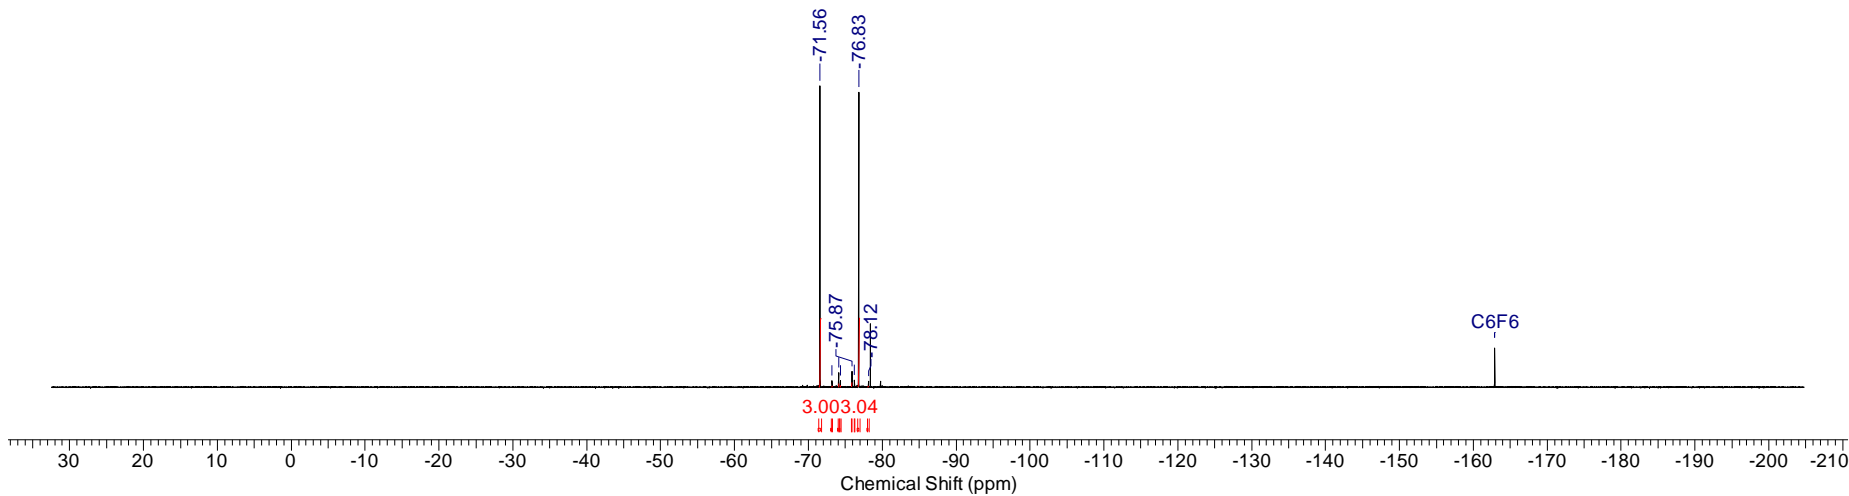

<sup>19</sup>F NMR spectrum of **3i** (376.3 MHz, CDCl<sub>3</sub>)

|                               |                                                                  |                              |                      |                         |                      |
|-------------------------------|------------------------------------------------------------------|------------------------------|----------------------|-------------------------|----------------------|
| <b>Acquisition Time (sec)</b> | 4.0894                                                           | <b>Comment</b>               | Imported from UXNMR. | <b>Date</b>             | 10 Apr 2019 17:07:26 |
| <b>File Name</b>              | F:\COMP_PRAK\DOCS\OUTPUT_301\2019\04.år ðæü\5ZA-093-1p.H_001001r | <b>Number of Transients</b>  | 4                    | <b>Frequency (MHz)</b>  | 400.13               |
| <b>Nucleus</b>                | 1H                                                               | <b>Original Points Count</b> | 32768                | <b>Points Count</b>     | 131072               |
| <b>Pulse Sequence</b>         | zg30                                                             | <b>Solvent</b>               | CHLOROFORM-D         | <b>Sweep Width (Hz)</b> | 8012.82              |
| <b>Temperature (degree C)</b> | 27.000                                                           |                              |                      |                         |                      |

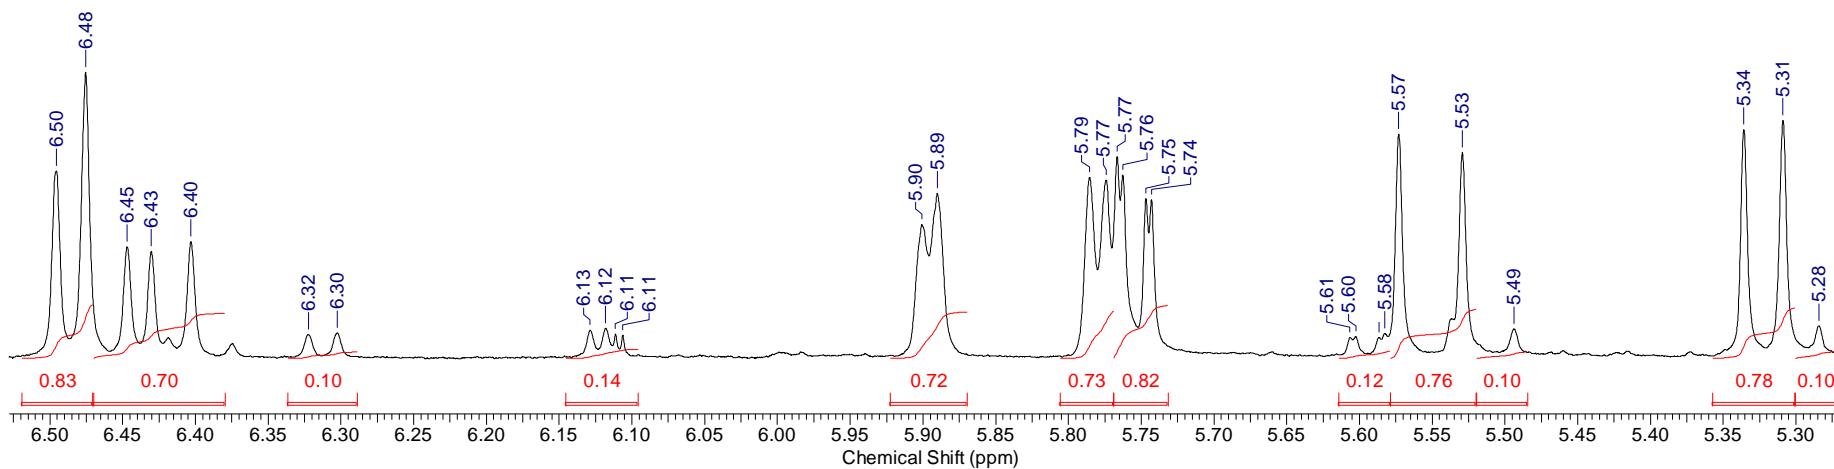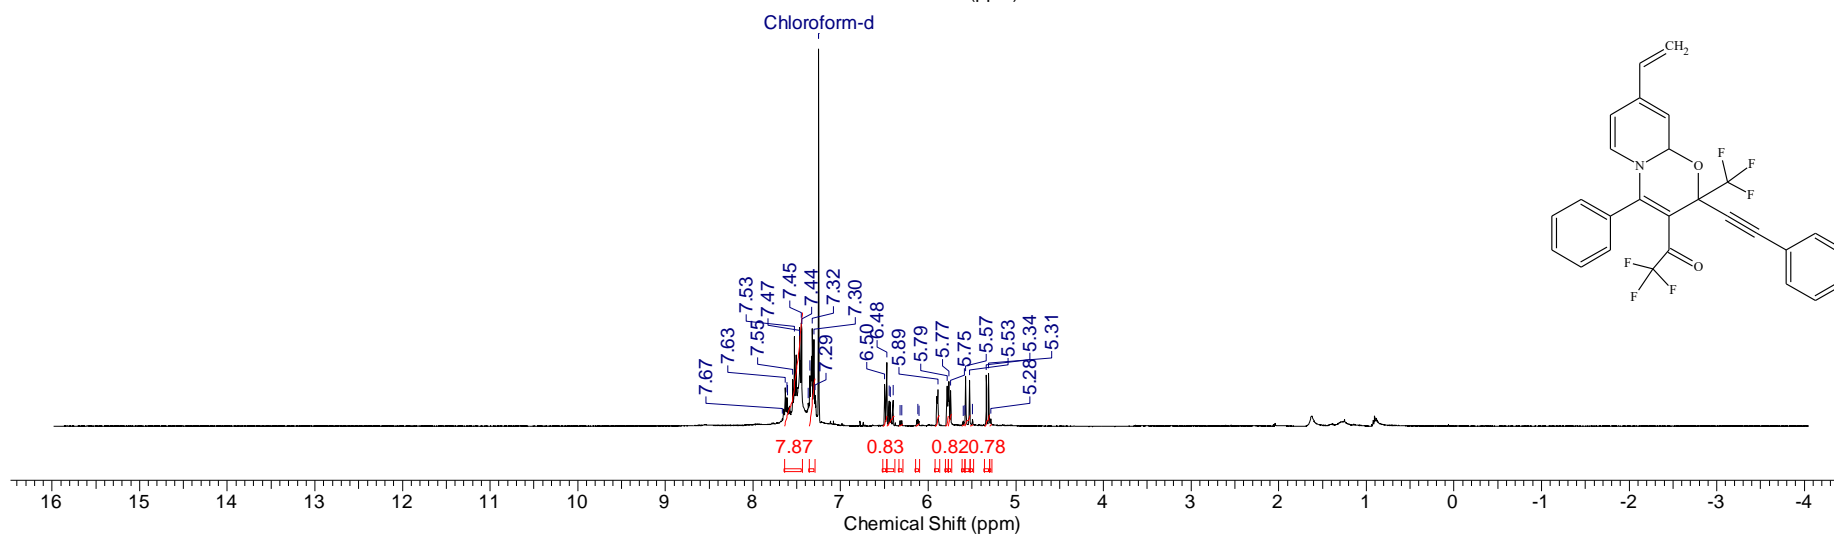

$^1\text{H}$  NMR spectrum of **3j** (400.1 MHz,  $\text{CDCl}_3$ )

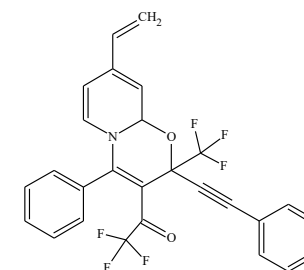

|                               |                                                                    |                             |                      |                              |                         |                      |        |
|-------------------------------|--------------------------------------------------------------------|-----------------------------|----------------------|------------------------------|-------------------------|----------------------|--------|
| <b>Acquisition Time (sec)</b> | 0.6783                                                             | <b>Comment</b>              | Imported from UXNMR. |                              | <b>Date</b>             | 12 Apr 2019 15:41:54 |        |
| <b>File Name</b>              | F:\COMP_PRAK\DOCS\OUTPUT_301\2019\04.äi ääëü\SA-093-1p-2.C_002001r |                             |                      | <b>Frequency (MHz)</b>       | 100.61                  |                      |        |
| <b>Nucleus</b>                | 13C                                                                | <b>Number of Transients</b> | 353                  | <b>Original Points Count</b> | 16384                   | <b>Points Count</b>  | 131072 |
| <b>Pulse Sequence</b>         | zpg30                                                              | <b>Solvent</b>              | CHLOROFORM-D         |                              | <b>Sweep Width (Hz)</b> | 24154.59             |        |
| <b>Temperature (degree C)</b> | 27.000                                                             |                             |                      |                              |                         |                      |        |

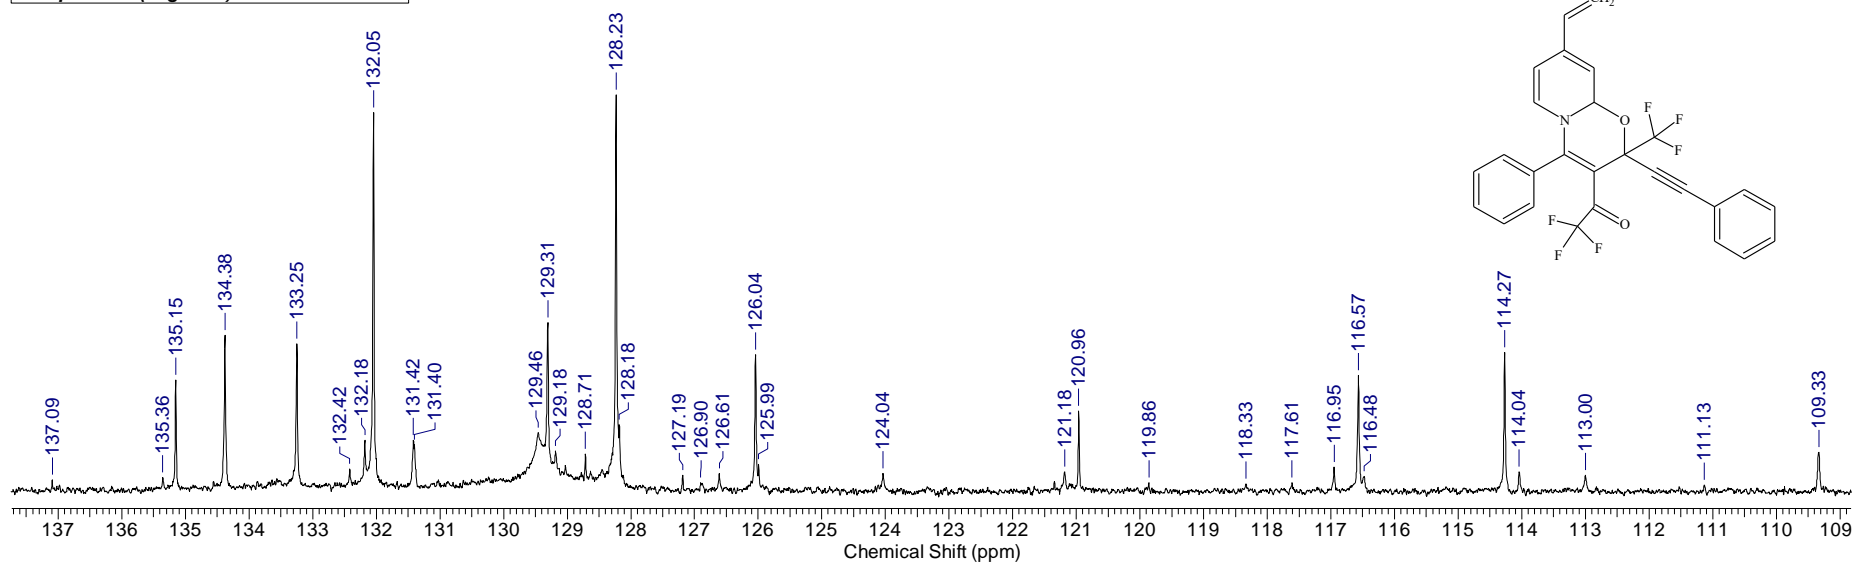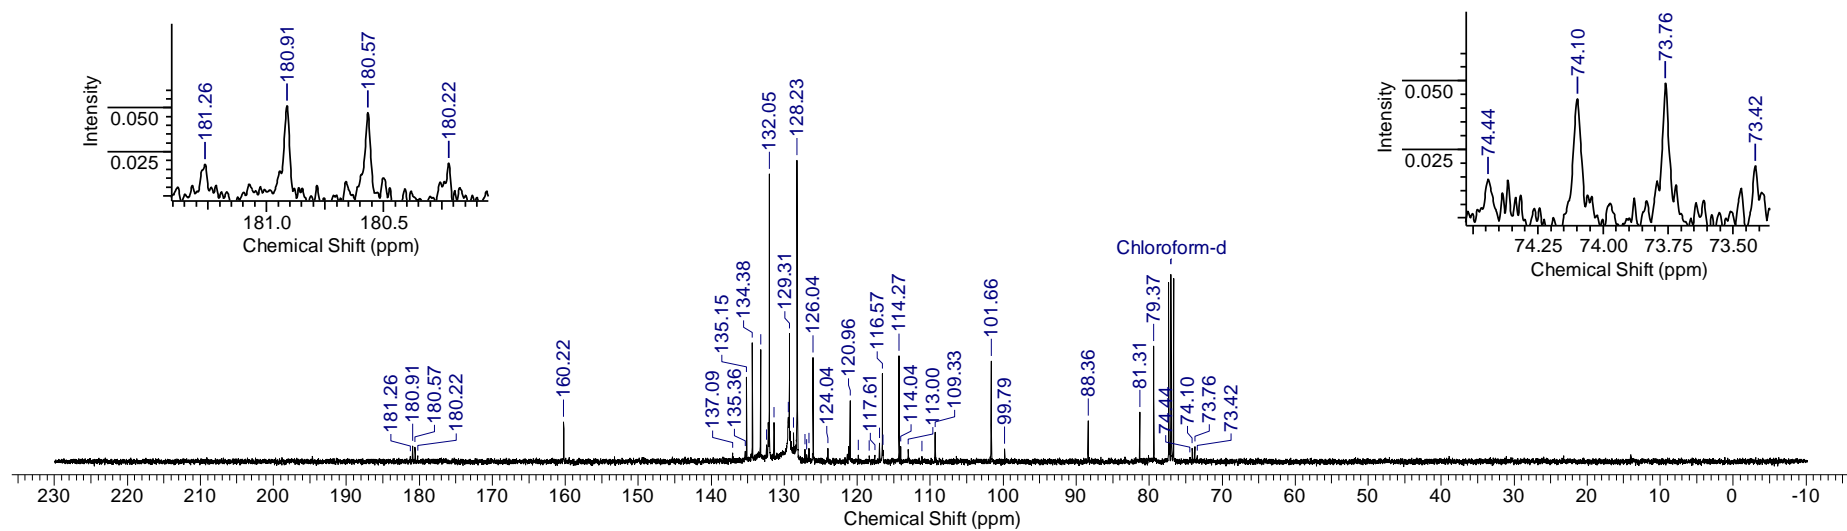

<sup>13</sup>C NMR spectrum of **3j** (100.6 MHz, CDCl<sub>3</sub>)



|                        |           |                        |             |                      |                                                                        |                       |        |
|------------------------|-----------|------------------------|-------------|----------------------|------------------------------------------------------------------------|-----------------------|--------|
| Acquisition Time (sec) | 2.3069    | Date                   | Apr 11 2019 | File Name            | C:\DOCS\OUTPUT_301\F19\2019.04.11\SZA-093-1P-F_20190411_01\FLUORINE_01 |                       |        |
| Frequency (MHz)        | 376.32    | Nucleus                | 19F         | Number of Transients | 8                                                                      | Original Points Count | 262144 |
| Points Count           | 262144    | Pulse Sequence         | s2pul       | Solvent              | CHLOROFORM-D                                                           |                       |        |
| Sweep Width (Hz)       | 113636.37 | Temperature (degree C) | 22.000      |                      |                                                                        |                       |        |

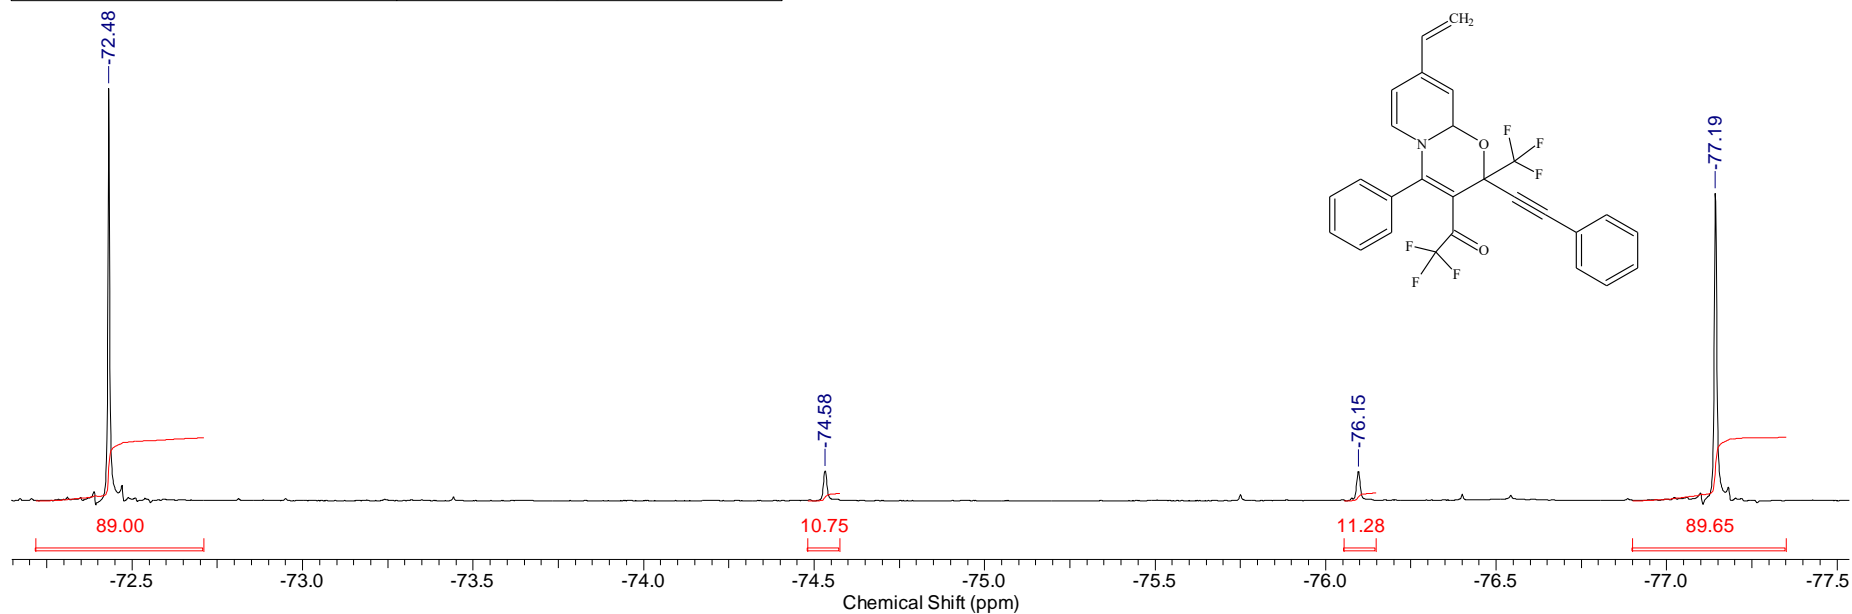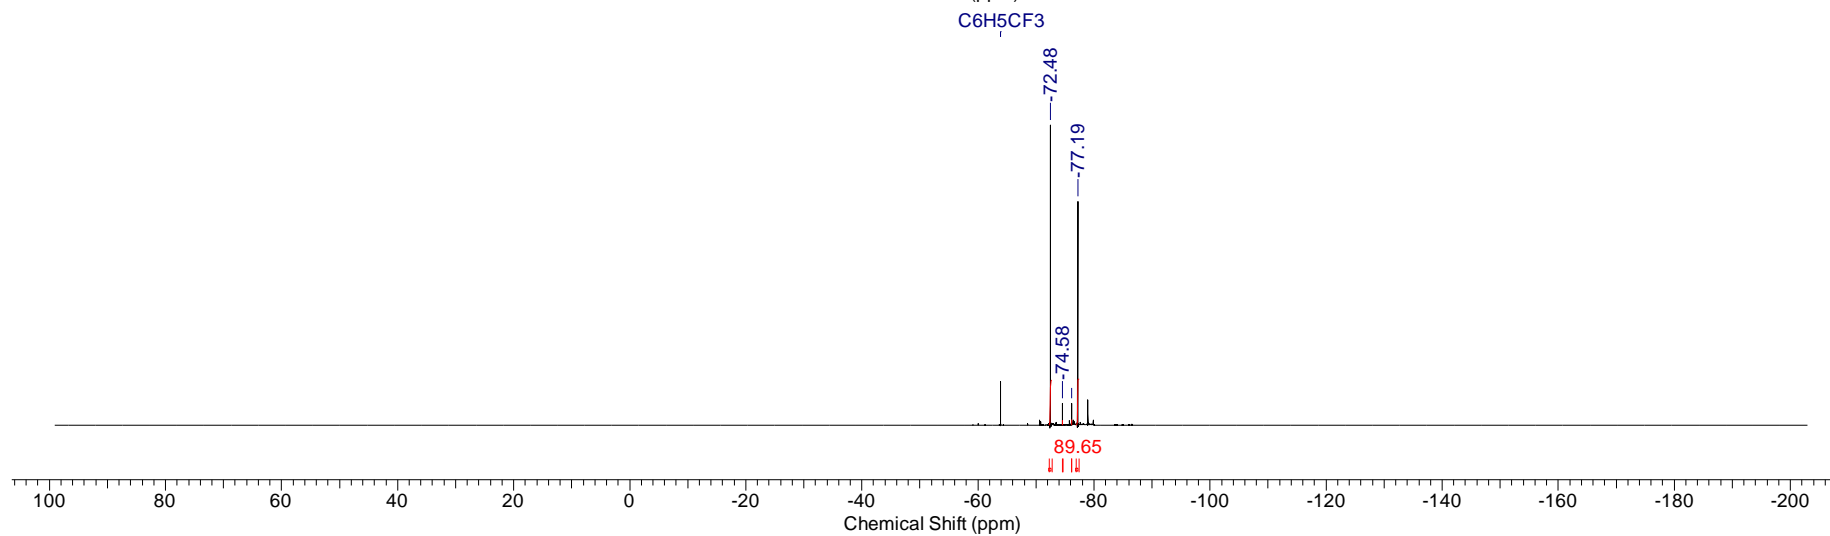

<sup>19</sup>F NMR spectrum of **3j** (376.3 MHz, CDCl<sub>3</sub>)

FW 503.3927 Formula C<sub>26</sub>H<sub>15</sub>F<sub>6</sub>NO<sub>3</sub>

|                        |                                                                      |                      |                      |                       |                      |
|------------------------|----------------------------------------------------------------------|----------------------|----------------------|-----------------------|----------------------|
| Acquisition Time (sec) | 4.0894                                                               | Comment              | Imported from UXNMR. | Date                  | 19 Jan 2019 16:59:38 |
| File Name              | F:\COMP_PRAK\DOCS\OUTPUT_301\2019\01.yi\190119 (1)\BM-1496-2_001001r |                      |                      | Frequency (MHz)       | 400.13               |
| Nucleus                | 1H                                                                   | Number of Transients | 8                    | Original Points Count | 32768                |
| Pulse Sequence         | zg30                                                                 | Solvent              | ACETONITRILE-D3      | Points Count          | 131072               |
| Temperature (degree C) | 27.000                                                               |                      |                      | Sweep Width (Hz)      | 8012.82              |

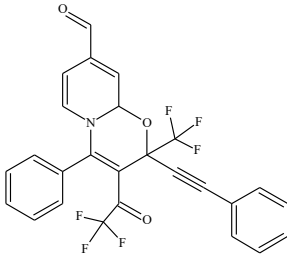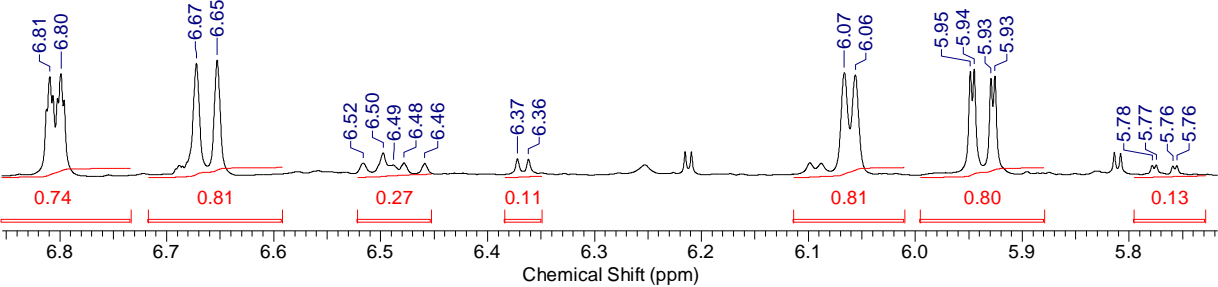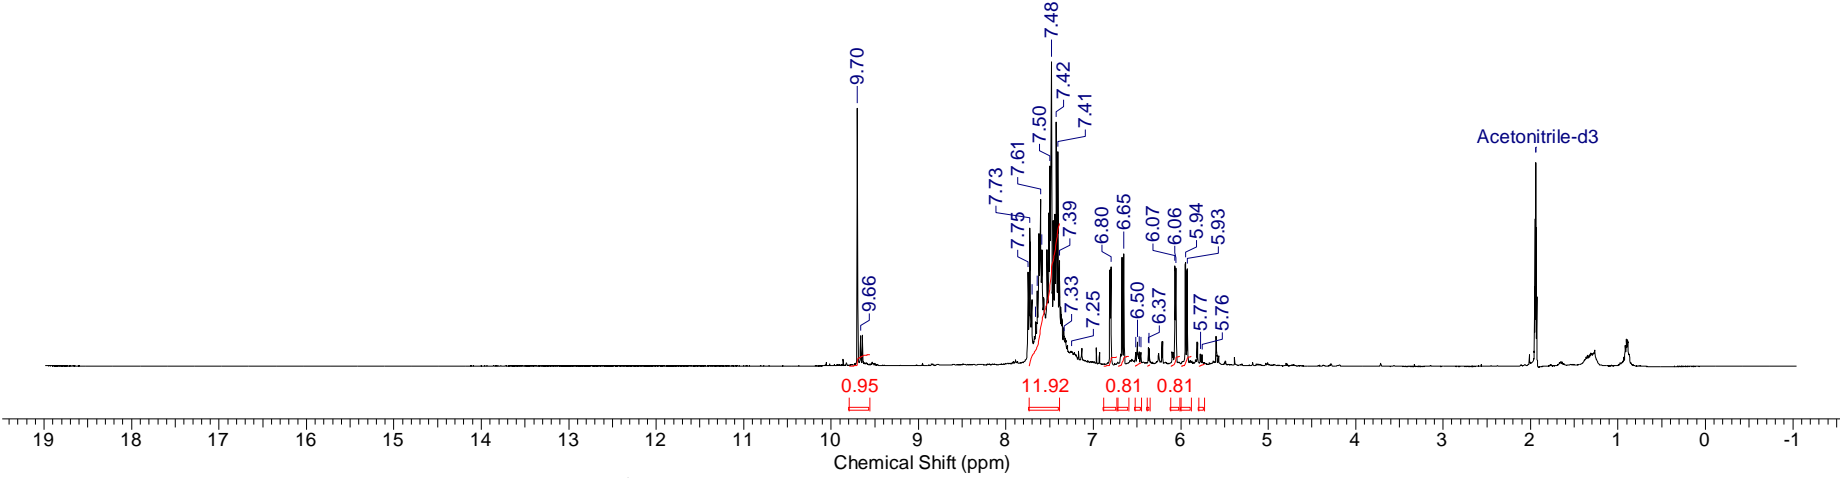

<sup>1</sup>H NMR spectrum of **3k** (400.1 MHz, CD<sub>3</sub>CN)

|           |          |                |                                                                |
|-----------|----------|----------------|----------------------------------------------------------------|
| <b>FW</b> | 503.3927 | <b>Formula</b> | C <sub>26</sub> H <sub>15</sub> F <sub>6</sub> NO <sub>3</sub> |
|-----------|----------|----------------|----------------------------------------------------------------|

|                               |                                                                          |                             |                      |                               |                      |
|-------------------------------|--------------------------------------------------------------------------|-----------------------------|----------------------|-------------------------------|----------------------|
| <b>Acquisition Time (sec)</b> | 0.6783                                                                   | <b>Comment</b>              | Imported from UXNMR. | <b>Date</b>                   | 19 Jan 2019 17:07:42 |
| <b>File Name</b>              | F:\COMP_PRAKIDOC\OUTPUT_30112019\01.yi.ääöü\190119 (1)\BM-1496-2_002001r |                             |                      | <b>Frequency (MHz)</b>        | 100.61               |
| <b>Nucleus</b>                | 13C                                                                      | <b>Number of Transients</b> | 136                  | <b>Original Points Count</b>  | 16384                |
| <b>Pulse Sequence</b>         | zpgp30                                                                   | <b>Solvent</b>              | CHLOROFORM-D         | <b>Sweep Width (Hz)</b>       | 24154.59             |
|                               |                                                                          |                             |                      | <b>Points Count</b>           | 131072               |
|                               |                                                                          |                             |                      | <b>Temperature (degree C)</b> | 27.000               |

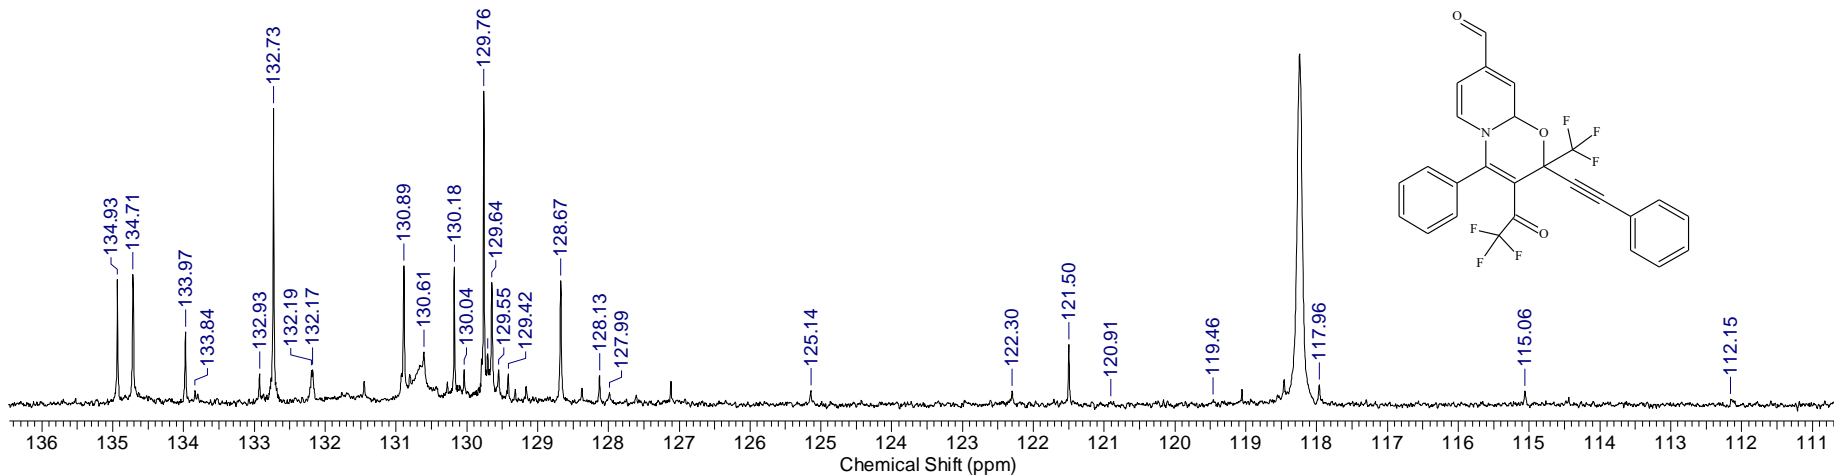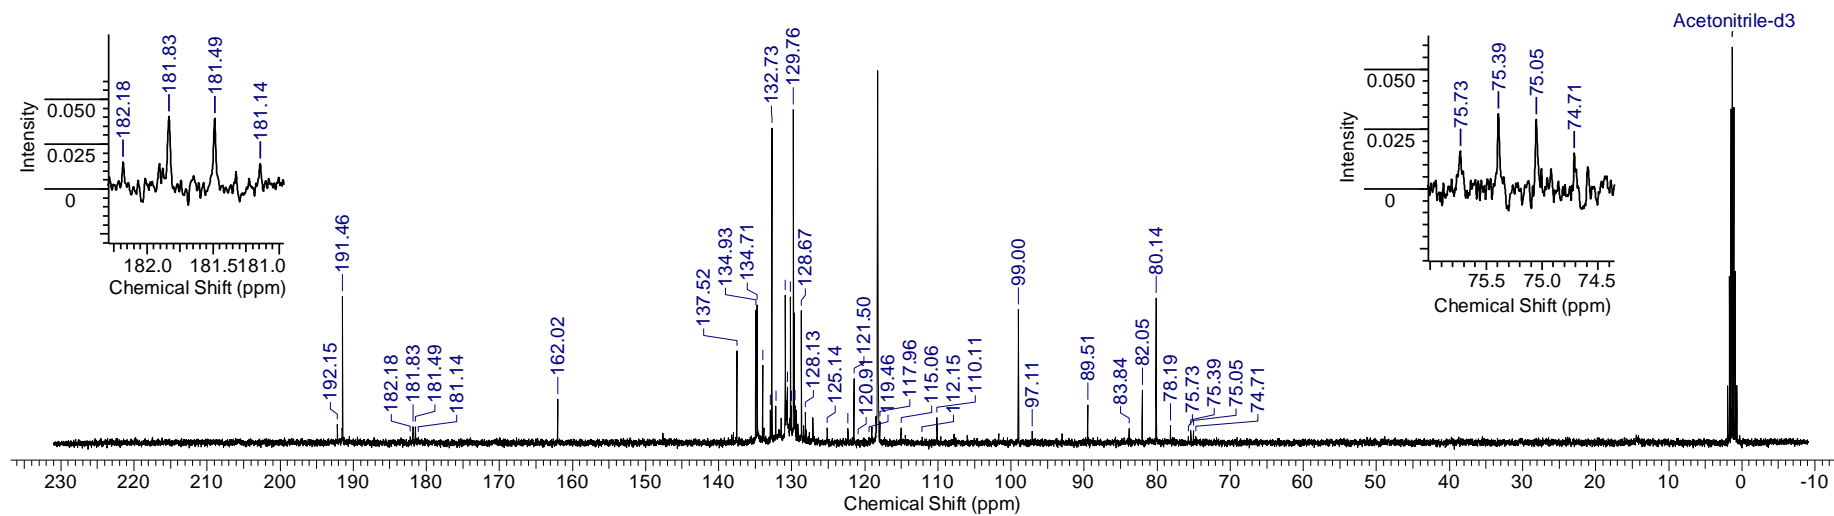

<sup>13</sup>C NMR spectrum of **3k** (100.6 MHz, CD<sub>3</sub>CN)

|           |          |                |                                                                |
|-----------|----------|----------------|----------------------------------------------------------------|
| <b>FW</b> | 503.3927 | <b>Formula</b> | C <sub>26</sub> H <sub>15</sub> F <sub>6</sub> NO <sub>3</sub> |
|-----------|----------|----------------|----------------------------------------------------------------|

|                               |                                                                  |                             |                      |                              |                      |
|-------------------------------|------------------------------------------------------------------|-----------------------------|----------------------|------------------------------|----------------------|
| <b>Acquisition Time (sec)</b> | 1.3664                                                           | <b>Comment</b>              | Imported from UXNMR. | <b>Date</b>                  | 21 Jan 2019 15:54:40 |
| <b>File Name</b>              | F:\COMP_PRAKIDOC\OUTPUT_30112019\01.yi\äöü\BM-1496-2.APT_004001r |                             |                      | <b>Frequency (MHz)</b>       | 100.61               |
| <b>Nucleus</b>                | 13C                                                              | <b>Number of Transients</b> | 325                  | <b>Original Points Count</b> | 32768                |
| <b>Pulse Sequence</b>         | jmod                                                             | <b>Solvent</b>              | ACETONITRILE-D3      | <b>Points Count</b>          | 131072               |
| <b>Temperature (degree C)</b> | 27.000                                                           |                             |                      | <b>Sweep Width (Hz)</b>      | 23980.81             |

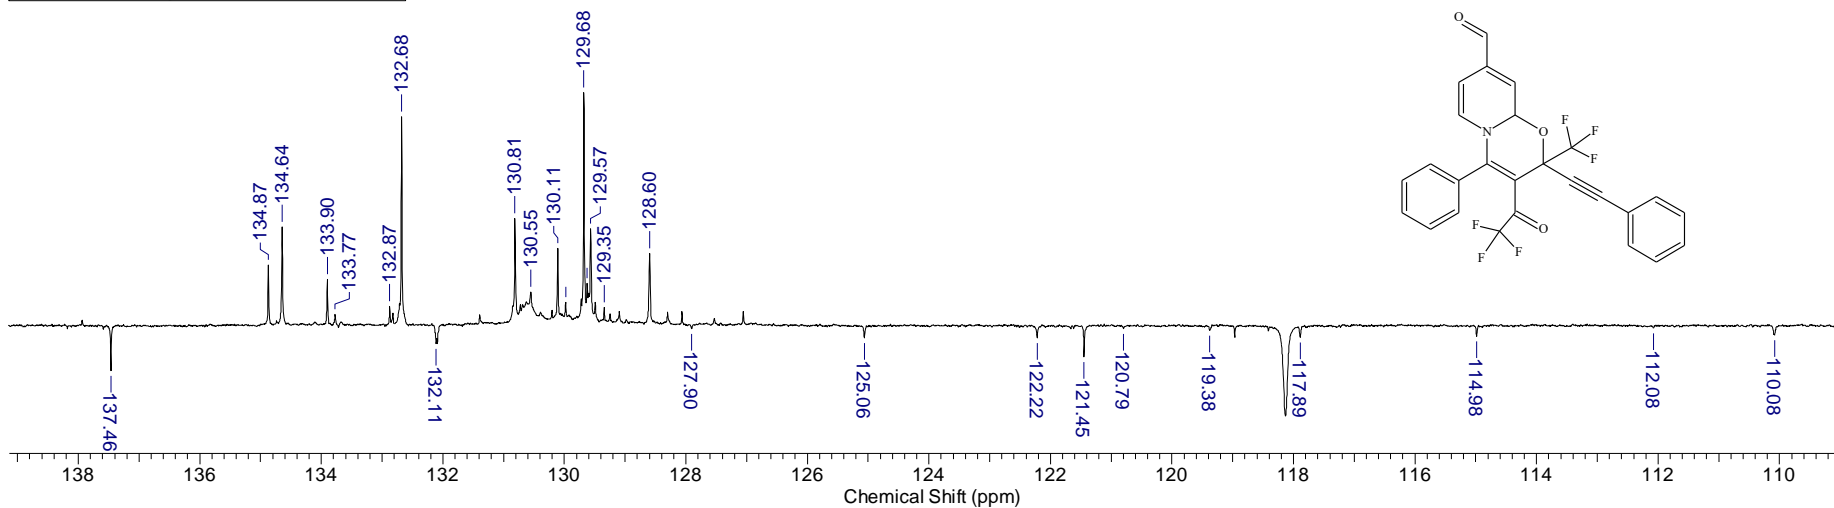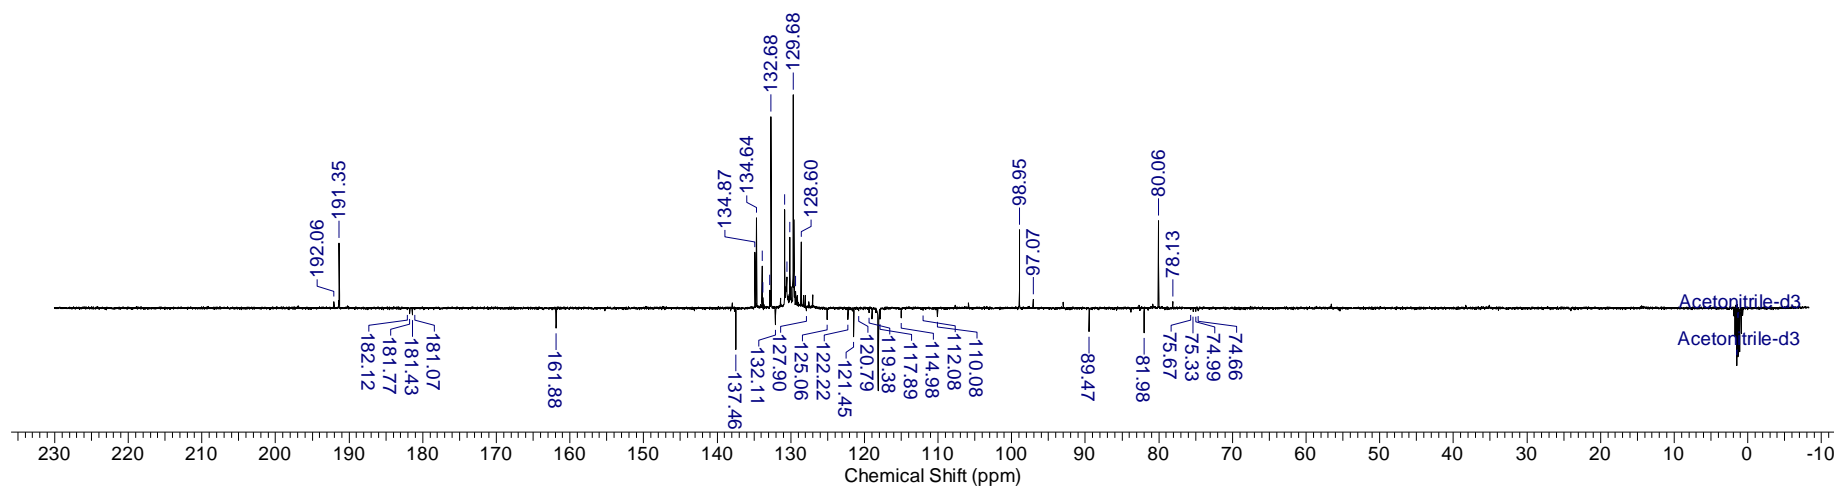

<sup>13</sup>C APT NMR spectrum of **3k** (100.6 MHz, CD<sub>3</sub>CN)

|           |          |                |                                                                |
|-----------|----------|----------------|----------------------------------------------------------------|
| <b>FW</b> | 503.3927 | <b>Formula</b> | C <sub>26</sub> H <sub>15</sub> F <sub>6</sub> NO <sub>3</sub> |
|-----------|----------|----------------|----------------------------------------------------------------|

|                               |          |                               |             |                             |                                                                               |                              |        |
|-------------------------------|----------|-------------------------------|-------------|-----------------------------|-------------------------------------------------------------------------------|------------------------------|--------|
| <b>Acquisition Time (sec)</b> | 1.5000   | <b>Date</b>                   | Jan 21 2019 | <b>File Name</b>            | F:\COMP_PRAK\DOCS\OUTPUT_301\F19\2019.01.21\BM-1496-2_20190121_01\FLUORINE_01 |                              |        |
| <b>Frequency (MHz)</b>        | 376.31   | <b>Nucleus</b>                | 19F         | <b>Number of Transients</b> | 16                                                                            | <b>Original Points Count</b> | 133929 |
| <b>Points Count</b>           | 262144   | <b>Pulse Sequence</b>         | s2pul       | <b>Solvent</b>              | ACETONITRILE-D3                                                               |                              |        |
| <b>Sweep Width (Hz)</b>       | 89285.71 | <b>Temperature (degree C)</b> | 22.000      |                             |                                                                               |                              |        |

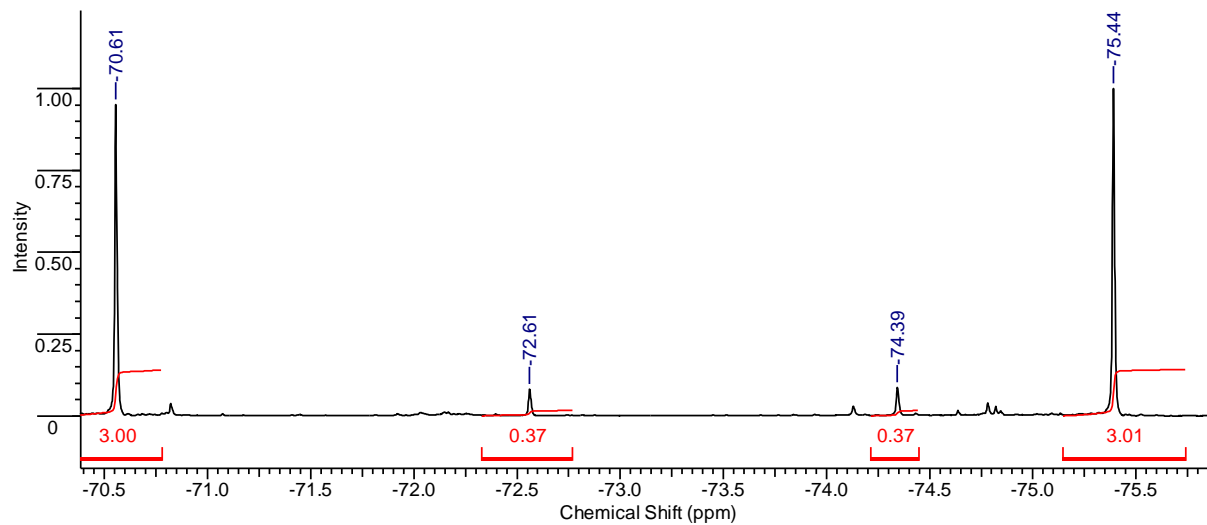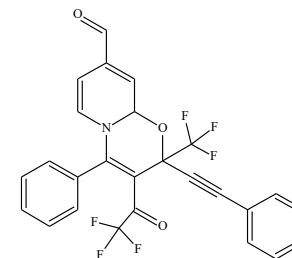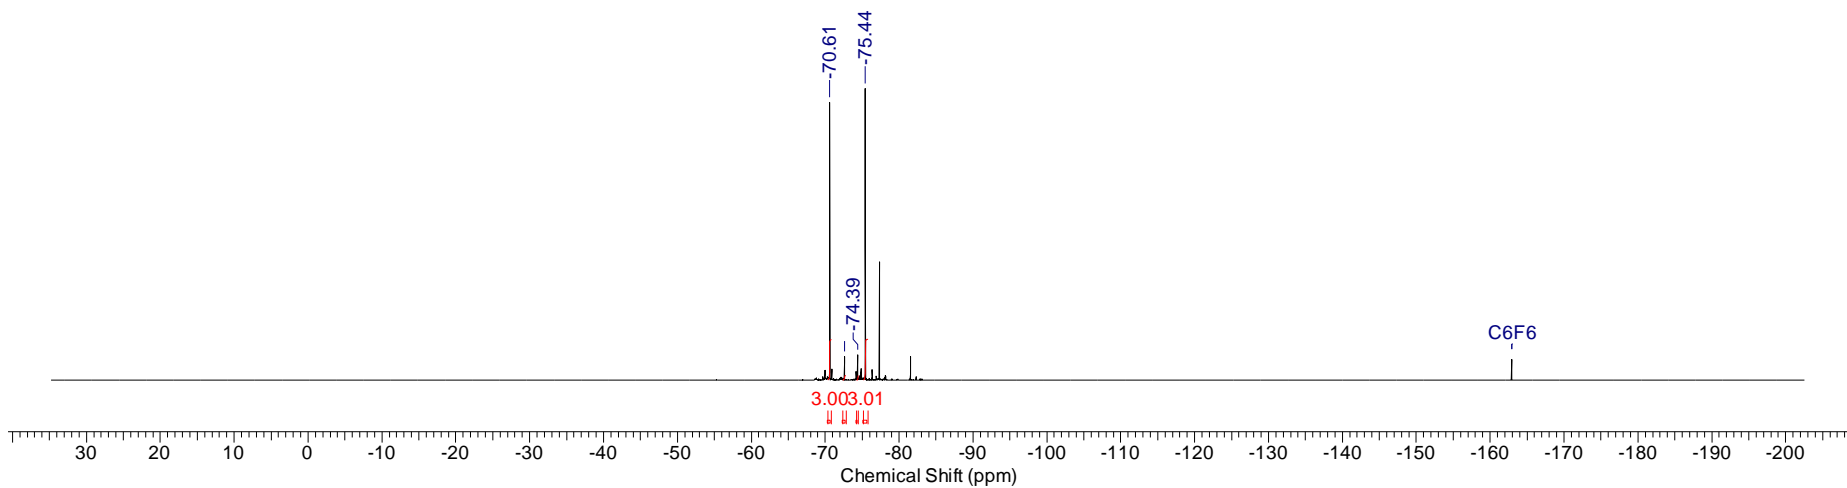

<sup>19</sup>F NMR spectrum of **3k** (376.3 MHz, CD<sub>3</sub>CN)

|                               |          |                               |                                                                |                              |                                                                               |
|-------------------------------|----------|-------------------------------|----------------------------------------------------------------|------------------------------|-------------------------------------------------------------------------------|
| <b>FW</b>                     | 503.3927 | <b>Formula</b>                | C <sub>26</sub> H <sub>15</sub> F <sub>6</sub> NO <sub>3</sub> |                              |                                                                               |
| <b>Acquisition Time (sec)</b> | 2.3069   | <b>Date</b>                   | Jan 24 2019                                                    | <b>File Name</b>             | F:\COMP_PRAK\DOCS\OUTPUT_301\F19\2019.01.24\BM-1498-F_20190124_01\FLUORINE_01 |
| <b>Frequency (MHz)</b>        | 376.31   | <b>Nucleus</b>                | 19F                                                            | <b>Number of Transients</b>  | 8                                                                             |
| <b>Points Count</b>           | 262144   | <b>Pulse Sequence</b>         | s2pul                                                          | <b>Original Points Count</b> | 221814                                                                        |
| <b>Sweep Width (Hz)</b>       | 96153.84 | <b>Temperature (degree C)</b> | 22.000                                                         | <b>Solvent</b>               | CHLOROFORM-D                                                                  |

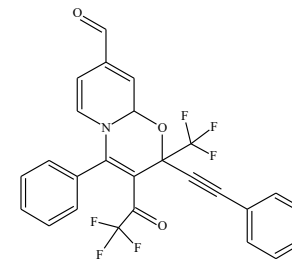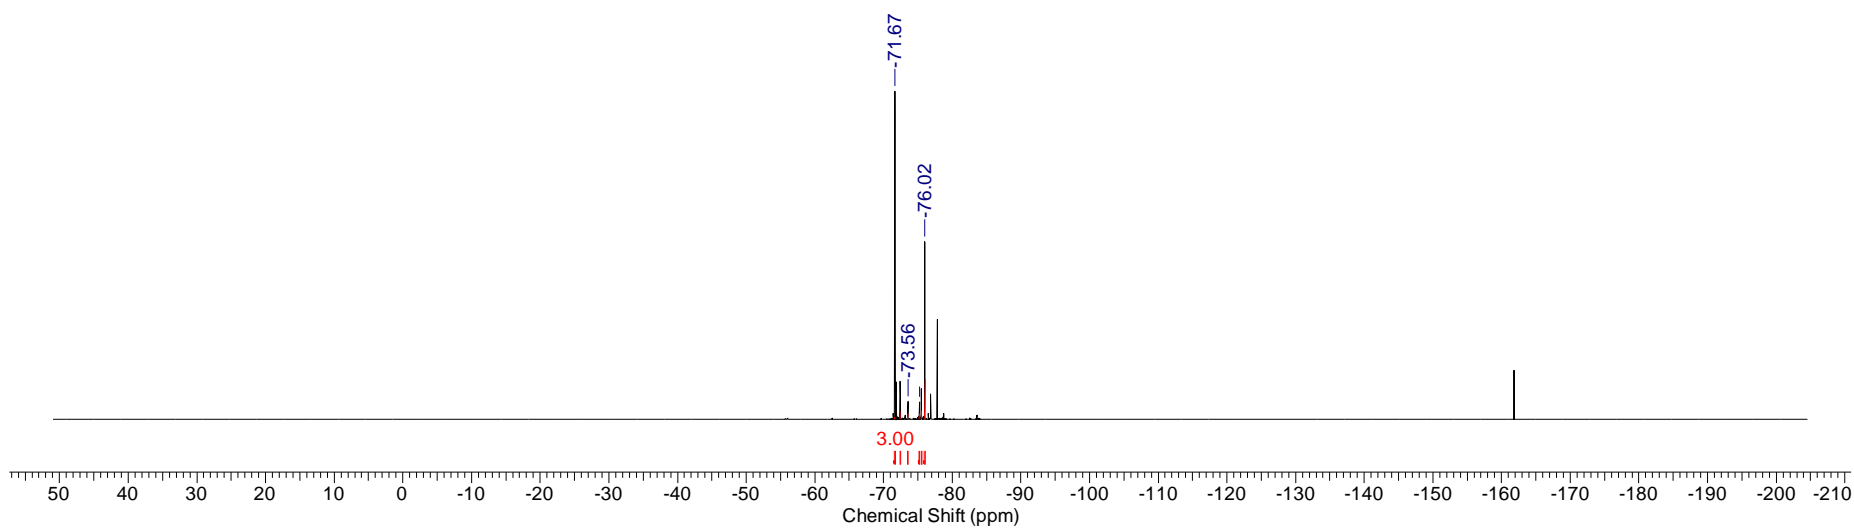

<sup>19</sup>F NMR spectrum of **3k** (376.3 MHz, CDCl<sub>3</sub>)

|                               |                                                |                              |                      |                               |                      |
|-------------------------------|------------------------------------------------|------------------------------|----------------------|-------------------------------|----------------------|
| <b>Acquisition Time (sec)</b> | 4.0894                                         | <b>Comment</b>               | Imported from UXNMR. | <b>Date</b>                   | 22 Jan 2019 14:16:22 |
| <b>File Name</b>              | I:\SPEC_2019_H_C\01.yi ääöü\SA-048-1.H_001001r | <b>Frequency (MHz)</b>       | 400.13               | <b>Nucleus</b>                | <sup>1</sup> H       |
| <b>Number of Transients</b>   | 5                                              | <b>Original Points Count</b> | 32768                | <b>Points Count</b>           | 131072               |
| <b>Solvent</b>                | CHLOROFORM-D                                   | <b>Sweep Width (Hz)</b>      | 8012.82              | <b>Pulse Sequence</b>         | zg30                 |
|                               |                                                |                              |                      | <b>Temperature (degree C)</b> | 27.000               |

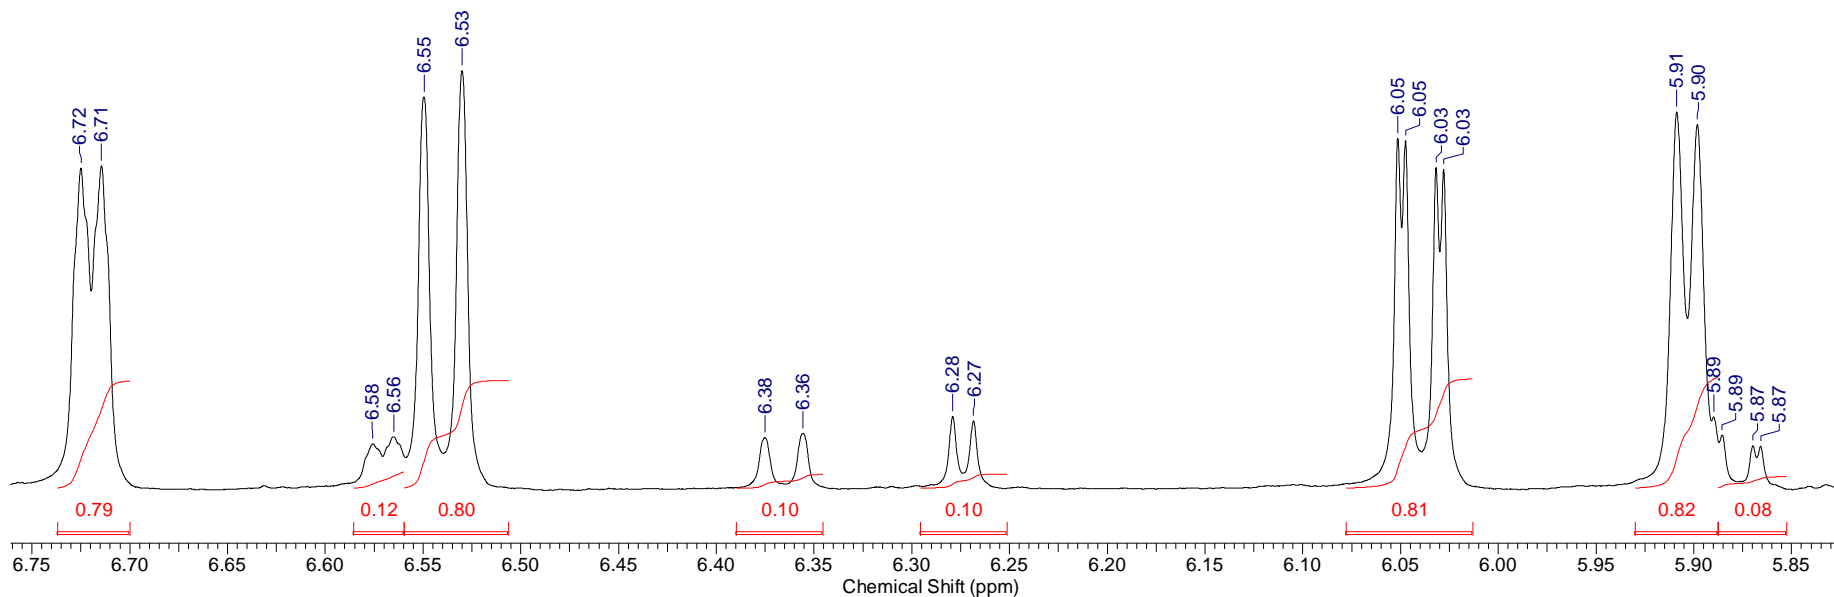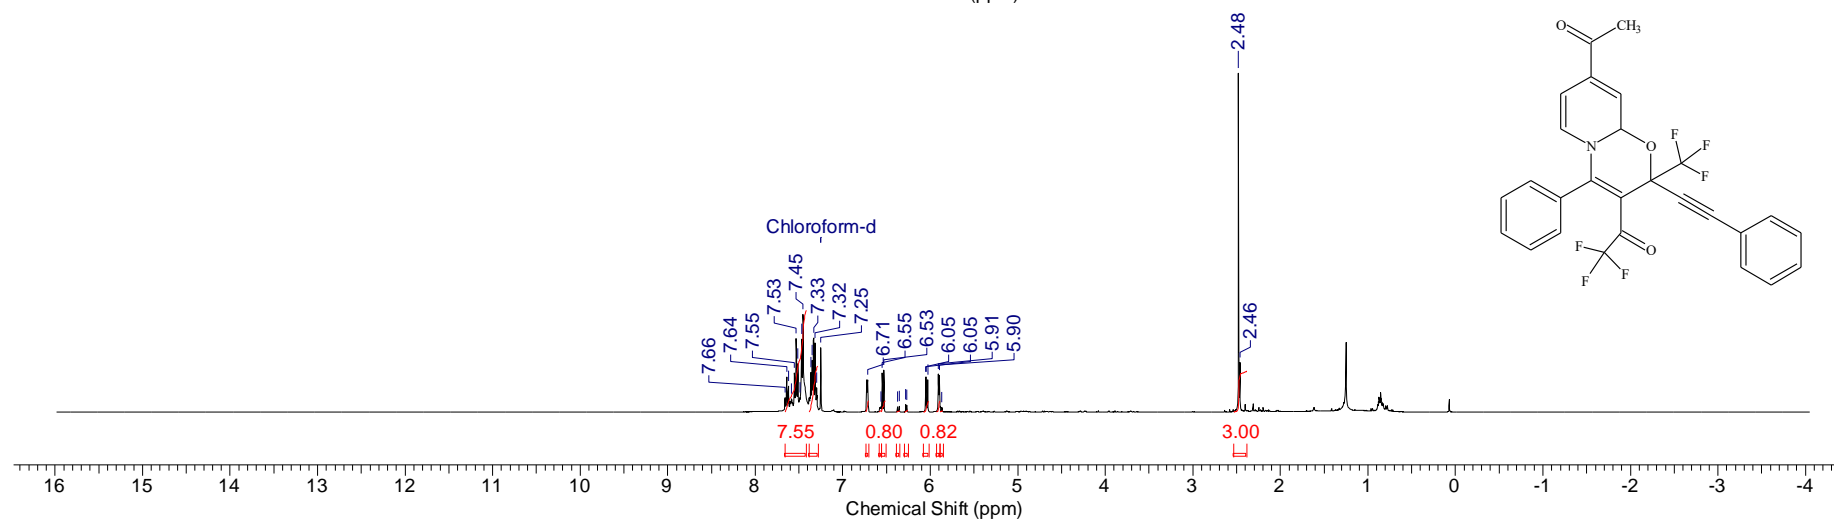

<sup>1</sup>H NMR spectrum of **31** (400.1 MHz, CDCl<sub>3</sub>)

|                               |                                                        |                             |                      |                              |             |                               |        |
|-------------------------------|--------------------------------------------------------|-----------------------------|----------------------|------------------------------|-------------|-------------------------------|--------|
| <b>Acquisition Time (sec)</b> | 0.6783                                                 | <b>Comment</b>              | Imported from UXNMR. |                              | <b>Date</b> | 22 Jan 2019 14:29:58          |        |
| <b>File Name</b>              | C:\DOCS\OUTPUT_301\2019\01.yi ääöü\SZA-048-1.C_002001r |                             |                      | <b>Frequency (MHz)</b>       | 100.61      |                               |        |
| <b>Nucleus</b>                | 13C                                                    | <b>Number of Transients</b> | 321                  | <b>Original Points Count</b> | 16384       | <b>Points Count</b>           | 131072 |
| <b>Pulse Sequence</b>         | zgpg30                                                 | <b>Solvent</b>              | DMSO-D6              | <b>Sweep Width (Hz)</b>      | 24154.59    | <b>Temperature (degree C)</b> | 27.000 |

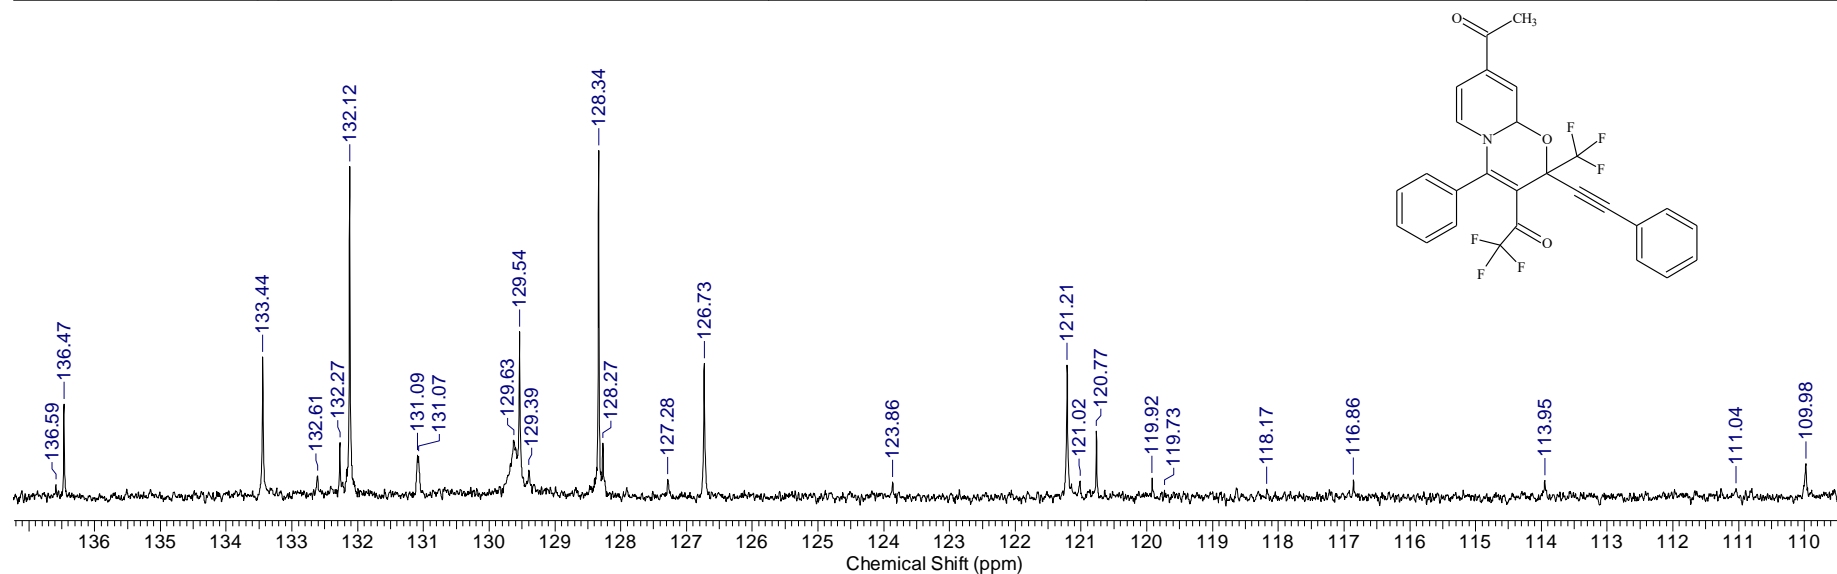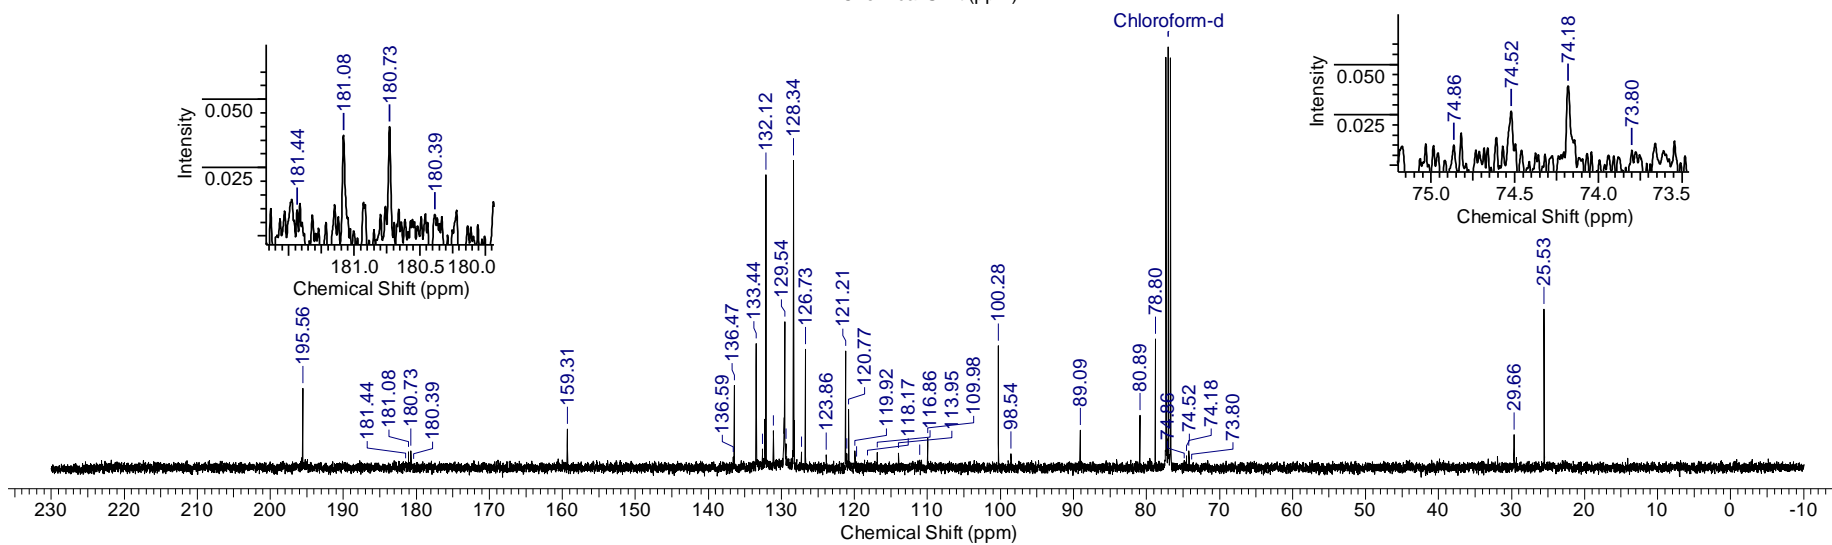

$^{13}\text{C}$  NMR spectrum of **31** (100.6 MHz,  $\text{CDCl}_3$ )



|                        |          |                        |             |                      |                                                                             |                       |        |
|------------------------|----------|------------------------|-------------|----------------------|-----------------------------------------------------------------------------|-----------------------|--------|
| Acquisition Time (sec) | 1.5000   | Date                   | Jan 21 2019 | File Name            | F:\COMP_PRAK\DOCS\OUTPUT_301\F19\2019.01.21\SAZ-048_20190121_01\FLUORINE_01 |                       |        |
| Frequency (MHz)        | 376.31   | Nucleus                | 19F         | Number of Transients | 16                                                                          | Original Points Count | 133929 |
| Points Count           | 262144   | Pulse Sequence         | s2pul       | Solvent              | CHLOROFORM-D                                                                |                       |        |
| Sweep Width (Hz)       | 89285.71 | Temperature (degree C) | 22.000      |                      |                                                                             |                       |        |

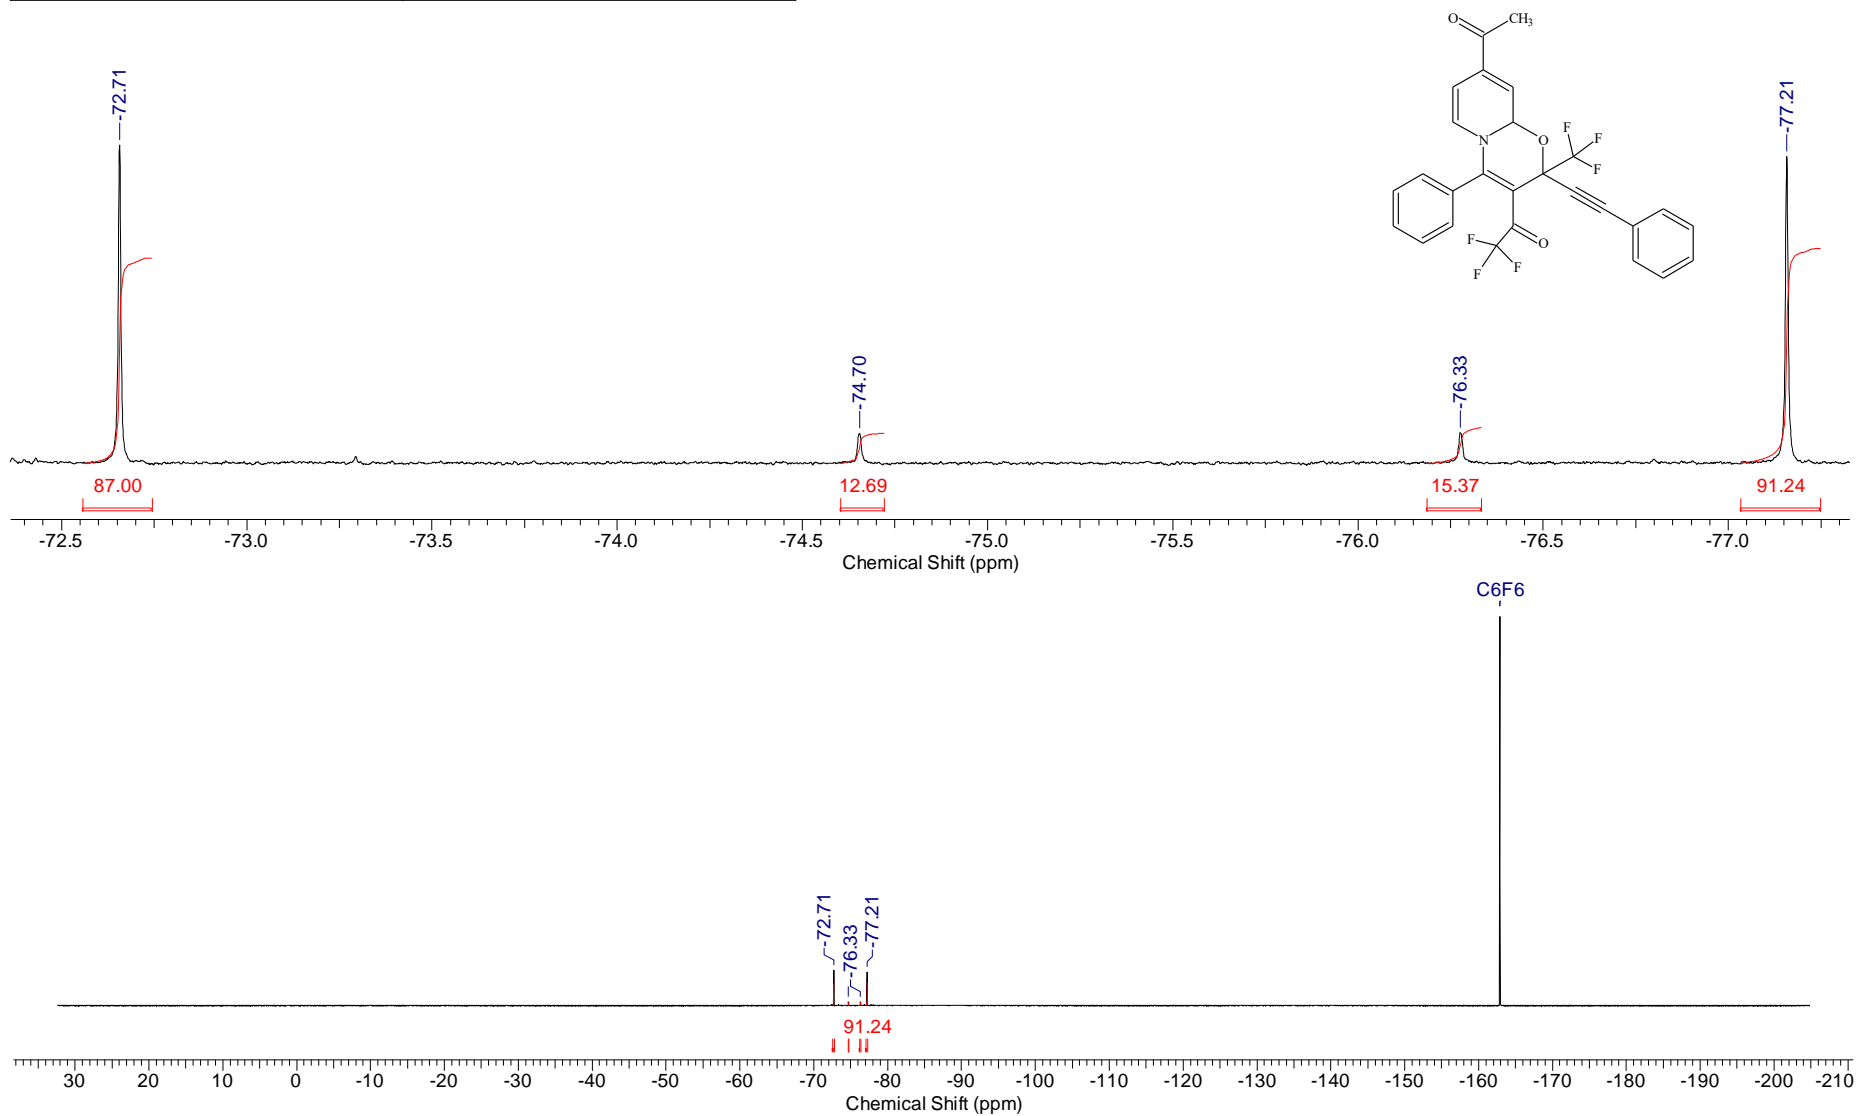

$^{19}\text{F}$  NMR spectrum of **31** (376.3 MHz,  $\text{CDCl}_3$ )

|                               |                                                  |                              |                      |                               |                      |
|-------------------------------|--------------------------------------------------|------------------------------|----------------------|-------------------------------|----------------------|
| <b>Acquisition Time (sec)</b> | 4.0894                                           | <b>Comment</b>               | Imported from UXNMR. | <b>Date</b>                   | 22 Jan 2019 15:30:22 |
| <b>File Name</b>              | I:\SPEC_2019_H_C\01.yi ääö\SZA-042-2-1.H_001001r | <b>Frequency (MHz)</b>       | 400.13               | <b>Nucleus</b>                | 1H                   |
| <b>Number of Transients</b>   | 4                                                | <b>Original Points Count</b> | 32768                | <b>Points Count</b>           | 131072               |
| <b>Solvent</b>                | CHLOROFORM-D                                     | <b>Sweep Width (Hz)</b>      | 8012.82              | <b>Pulse Sequence</b>         | zg30                 |
|                               |                                                  |                              |                      | <b>Temperature (degree C)</b> | 27.000               |

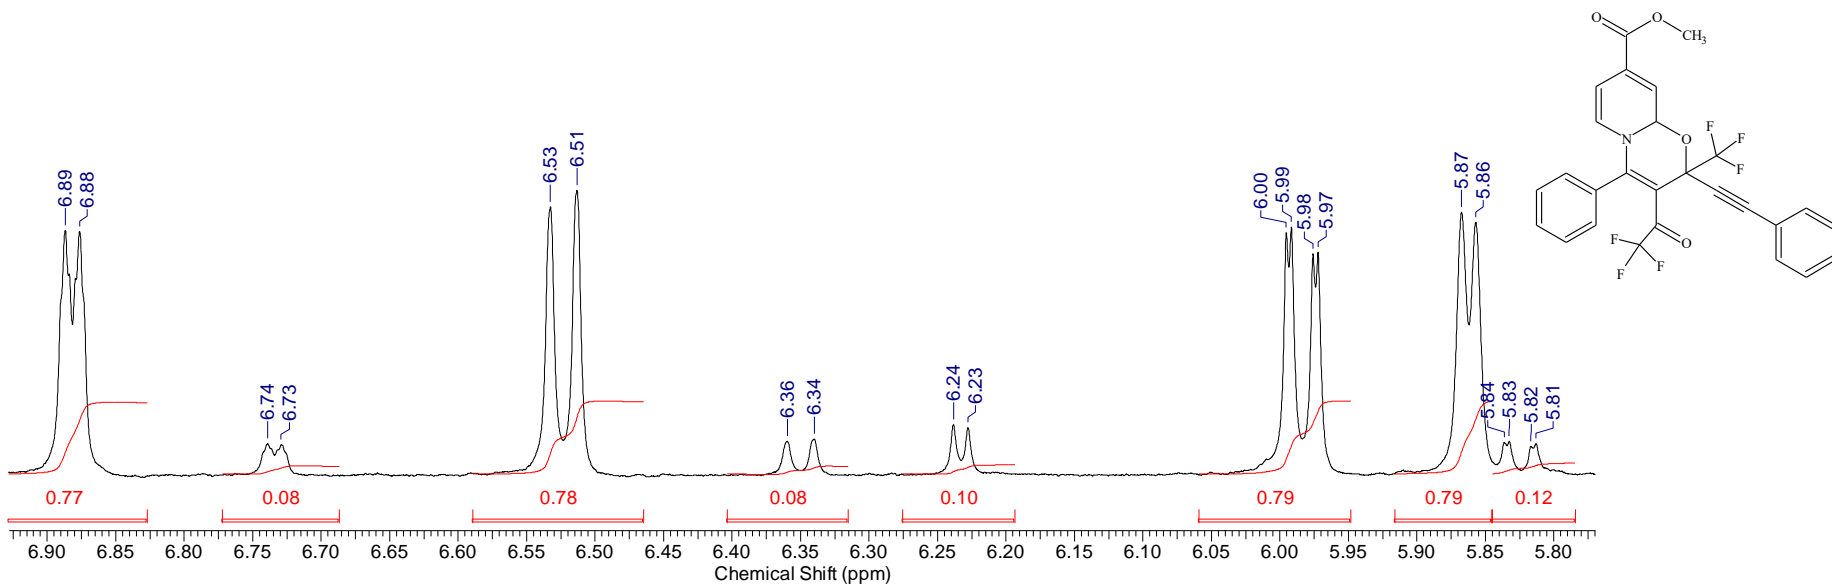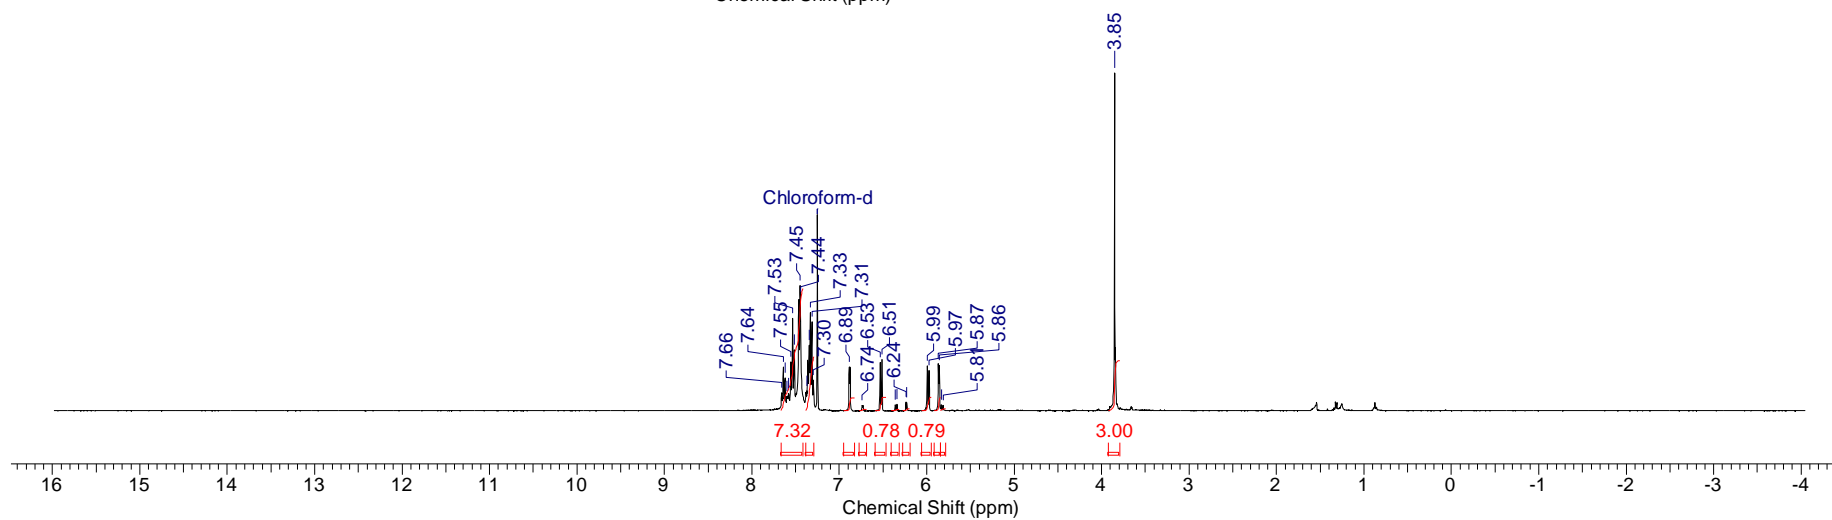

<sup>1</sup>H NMR spectrum of **3m** (400.1 MHz, CDCl<sub>3</sub>)

|                               |                                                               |                              |                      |                               |                      |
|-------------------------------|---------------------------------------------------------------|------------------------------|----------------------|-------------------------------|----------------------|
| <b>Acquisition Time (sec)</b> | 0.6783                                                        | <b>Comment</b>               | Imported from UXNMR. | <b>Date</b>                   | 24 Jan 2019 12:36:52 |
| <b>File Name</b>              | I:\SPEC 2019 H <sub>2</sub> O\1.yi ääö\LSZA-042-2-1.C_002001r | <b>Frequency (MHz)</b>       | 100.61               | <b>Nucleus</b>                | <sup>13</sup> C      |
| <b>Number of Transients</b>   | 1040                                                          | <b>Original Points Count</b> | 16384                | <b>Points Count</b>           | 131072               |
| <b>Solvent</b>                | DMSO-D6                                                       | <b>Sweep Width (Hz)</b>      | 24154.59             | <b>Temperature (degree C)</b> | 27.000               |
|                               |                                                               |                              |                      | <b>Pulse Sequence</b>         | zgpg30               |

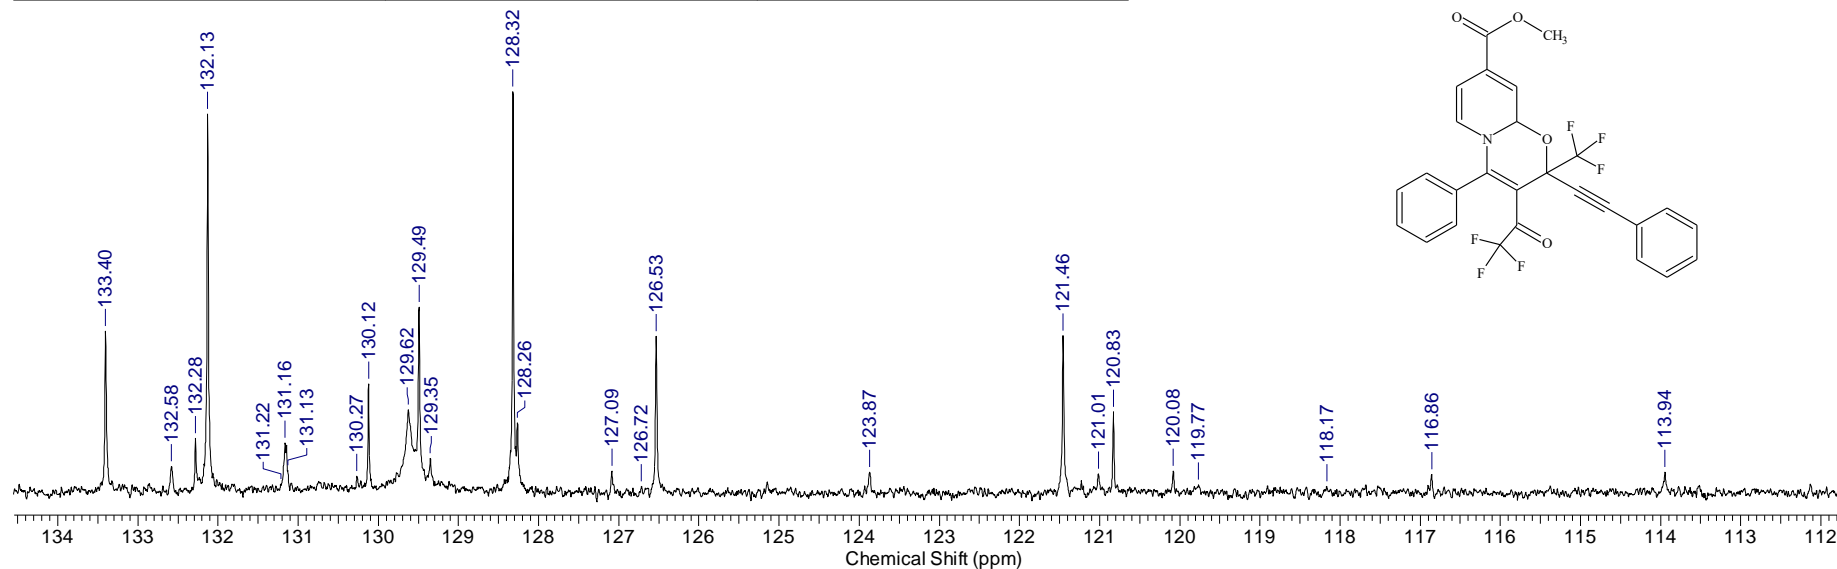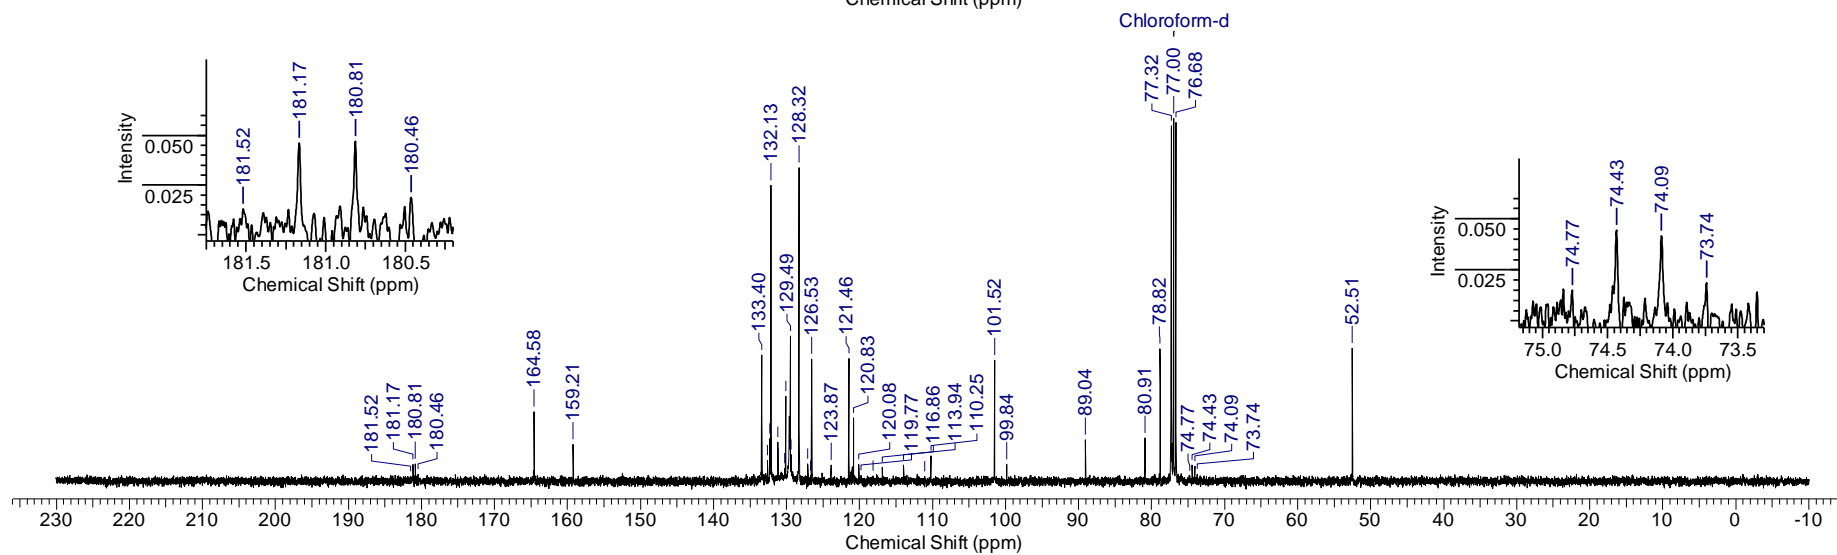

<sup>13</sup>C NMR spectrum of **3m** (100.6 MHz, CDCl<sub>3</sub>)

|                        |          |                        |                 |                      |                                                                               |                       |        |
|------------------------|----------|------------------------|-----------------|----------------------|-------------------------------------------------------------------------------|-----------------------|--------|
| Acquisition Time (sec) | 1.5000   | Date                   | Jan 21 2019     | File Name            | F:\COMP_PRAK\DOCS\OUTPUT_301\F19\2019.01.21\SZA-042-2_20190121_01\FLUORINE_01 |                       |        |
| Frequency (MHz)        | 376.31   | Nucleus                | <sup>19</sup> F | Number of Transients | 16                                                                            | Original Points Count | 133929 |
| Points Count           | 262144   | Pulse Sequence         | s2pul           | Solvent              | CHLOROFORM-D                                                                  |                       |        |
| Sweep Width (Hz)       | 89285.71 | Temperature (degree C) | 22.000          |                      |                                                                               |                       |        |

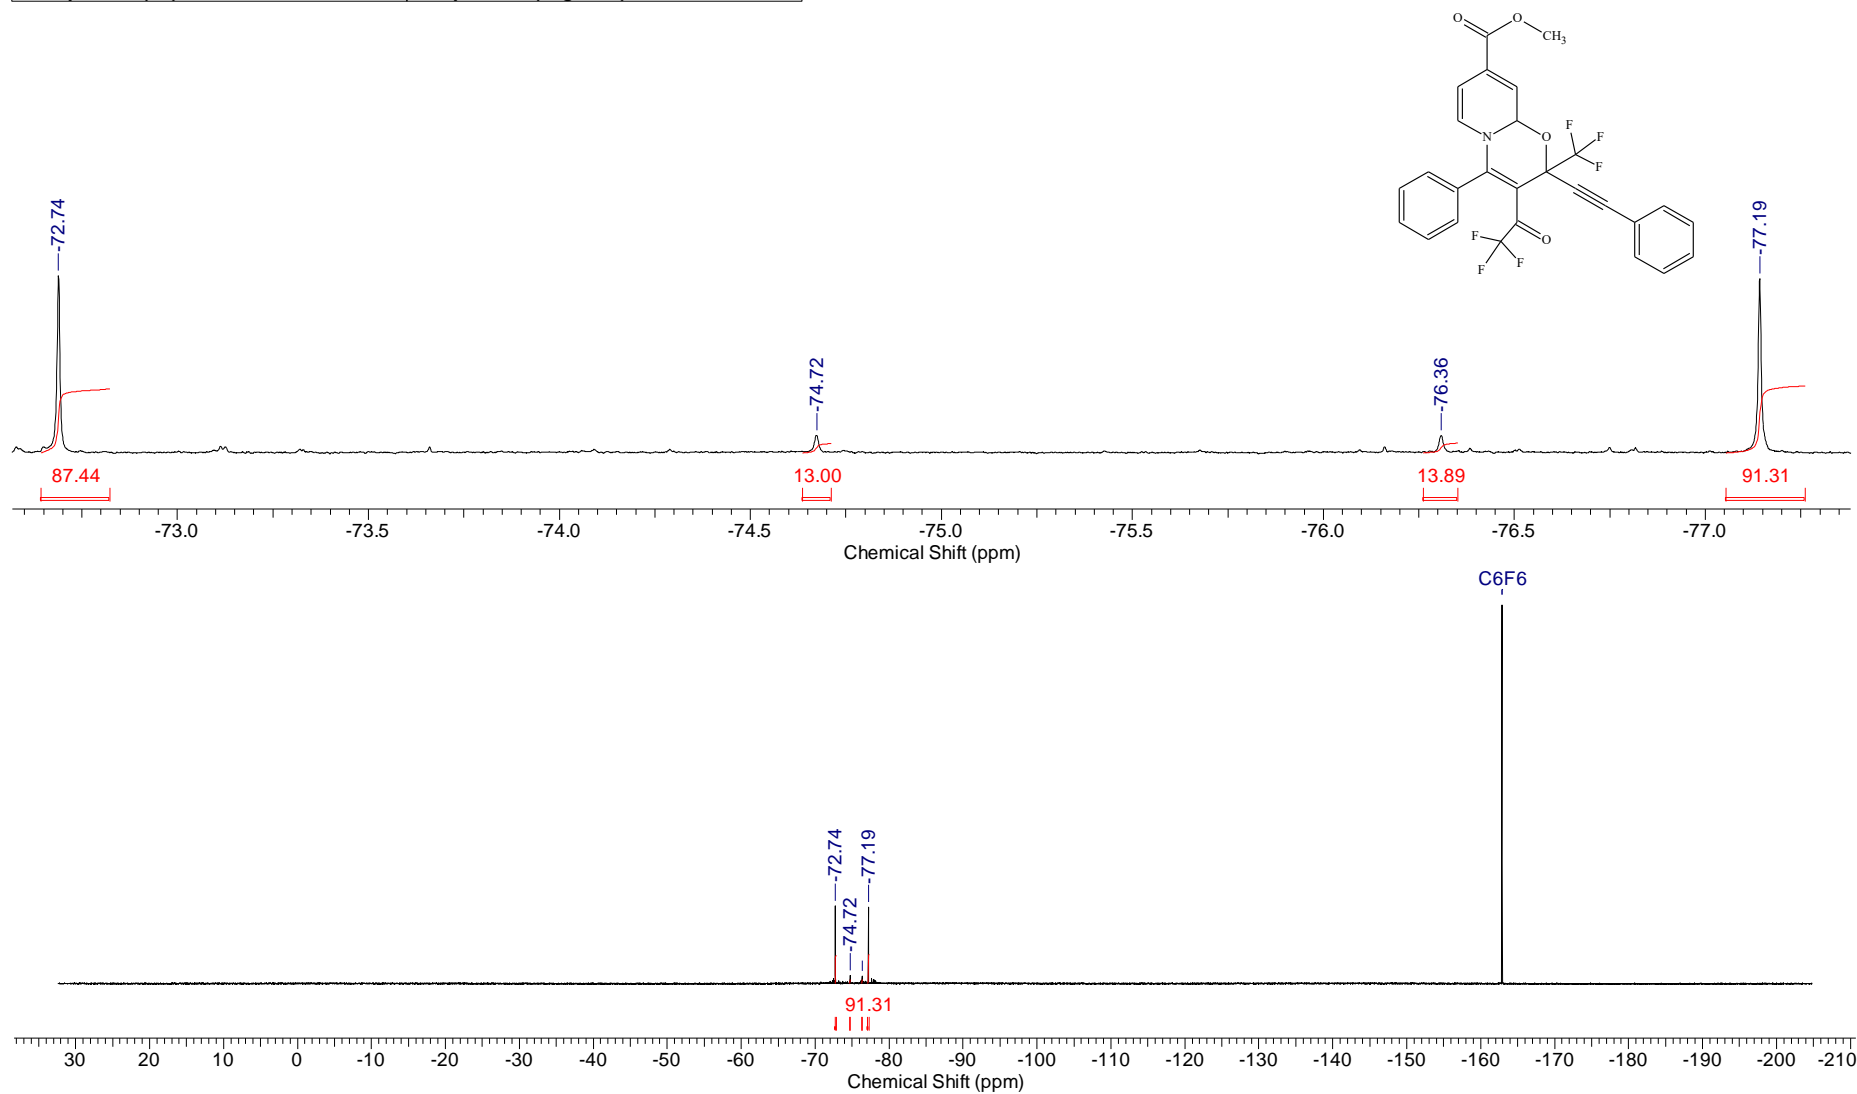

|                               |                                         |                               |                      |                       |                      |                             |              |
|-------------------------------|-----------------------------------------|-------------------------------|----------------------|-----------------------|----------------------|-----------------------------|--------------|
| <b>Acquisition Time (sec)</b> | 4.0894                                  | <b>Comment</b>                | Imported from UXNMR. | <b>Date</b>           | 29 Mar 2019 15:16:56 |                             |              |
| <b>File Name</b>              | I:\SPEC_2019_H\03.i\03\SA-094.H_001001r | <b>Frequency (MHz)</b>        | 400.13               | <b>Nucleus</b>        | 1H                   | <b>Number of Transients</b> | 4            |
| <b>Original Points Count</b>  | 32768                                   | <b>Points Count</b>           | 131072               | <b>Pulse Sequence</b> | zg30                 | <b>Solvent</b>              | CHLOROFORM-D |
| <b>Sweep Width (Hz)</b>       | 8012.82                                 | <b>Temperature (degree C)</b> | 27.000               |                       |                      |                             |              |

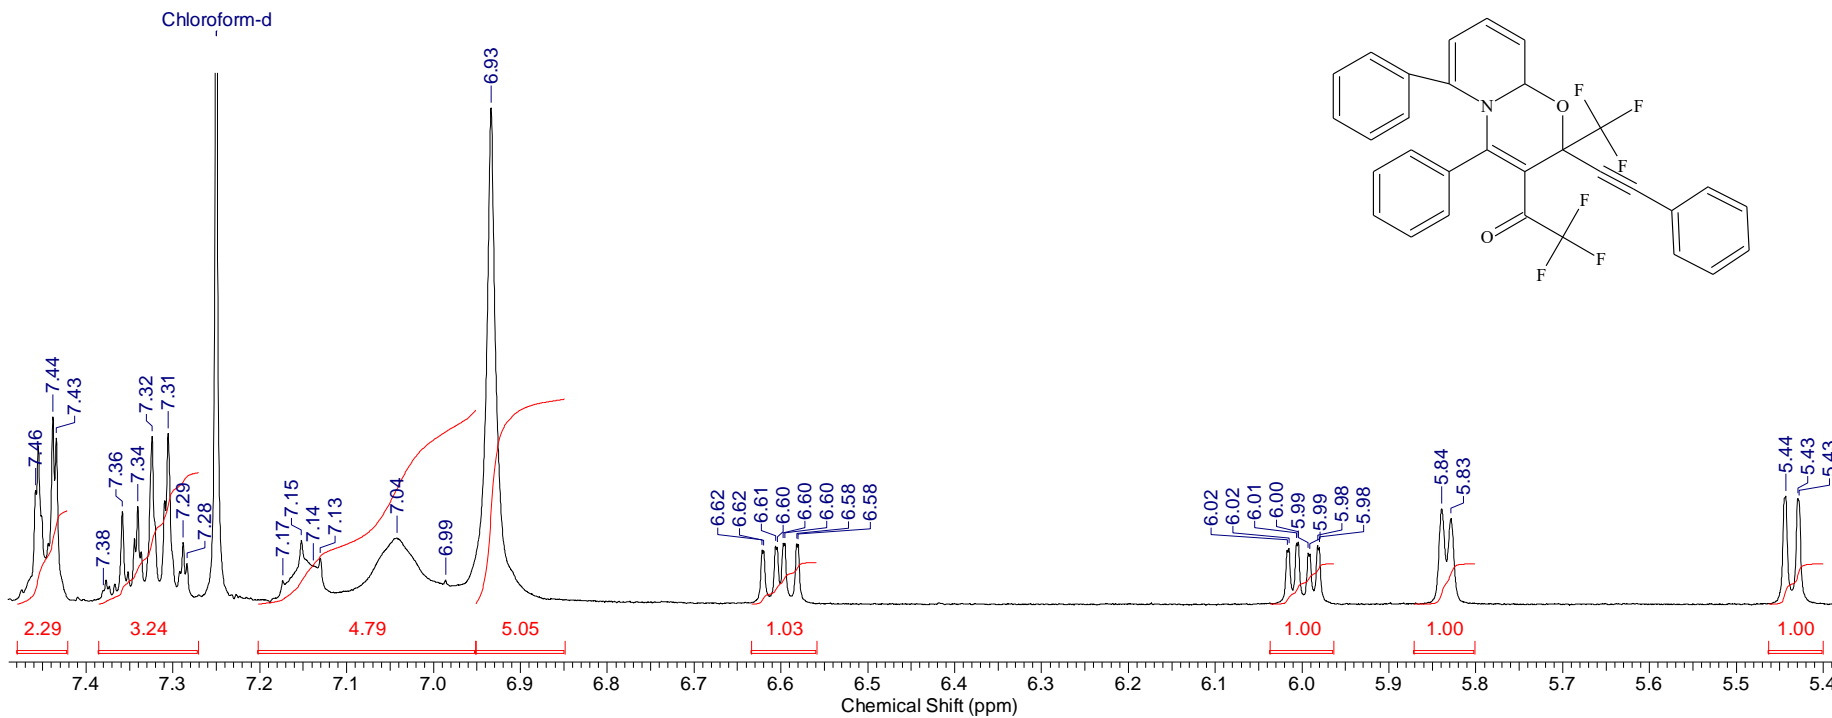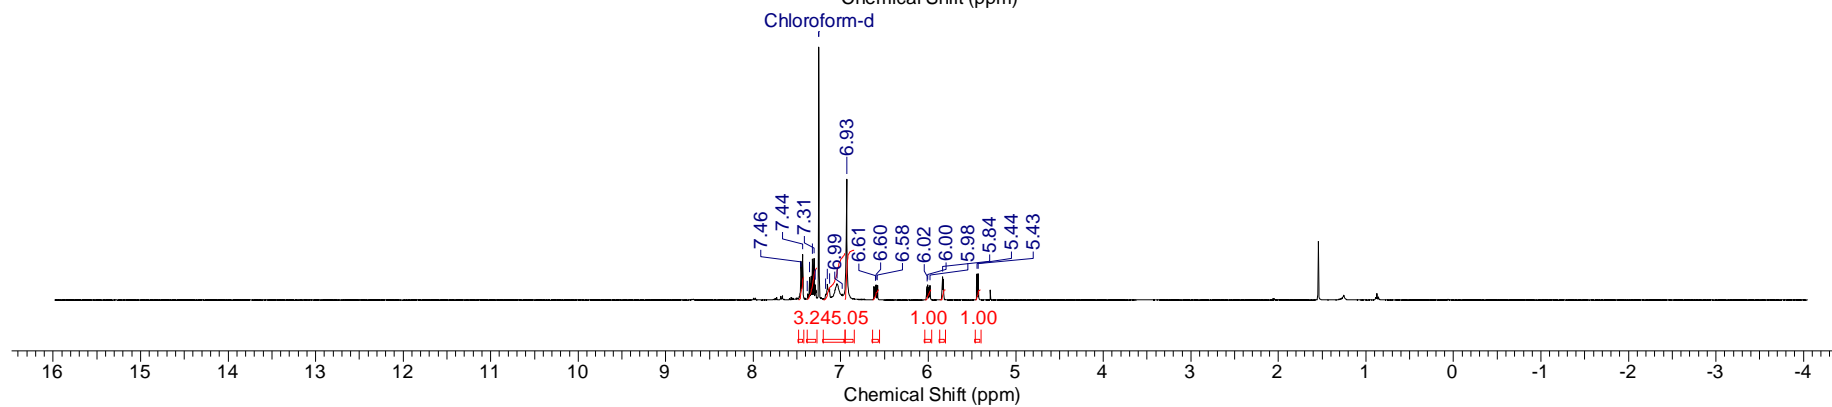

$^1\text{H}$  NMR spectrum of **3n** (400.1 MHz,  $\text{CDCl}_3$ )

|                               |                                             |                              |                      |                               |                      |
|-------------------------------|---------------------------------------------|------------------------------|----------------------|-------------------------------|----------------------|
| <b>Acquisition Time (sec)</b> | 0.6783                                      | <b>Comment</b>               | Imported from UXNMR. | <b>Date</b>                   | 02 Apr 2019 14:51:28 |
| <b>File Name</b>              | I:\SPEC_2019_H\CI04.äi ääü\SA-094.C_002001r | <b>Frequency (MHz)</b>       | 100.61               | <b>Nucleus</b>                | 13C                  |
| <b>Number of Transients</b>   | 562                                         | <b>Original Points Count</b> | 16384                | <b>Points Count</b>           | 131072               |
| <b>Solvent</b>                | CHLOROFORM-D                                | <b>Sweep Width (Hz)</b>      | 24154.59             | <b>Pulse Sequence</b>         | zpgp30               |
|                               |                                             |                              |                      | <b>Temperature (degree C)</b> | 27.000               |

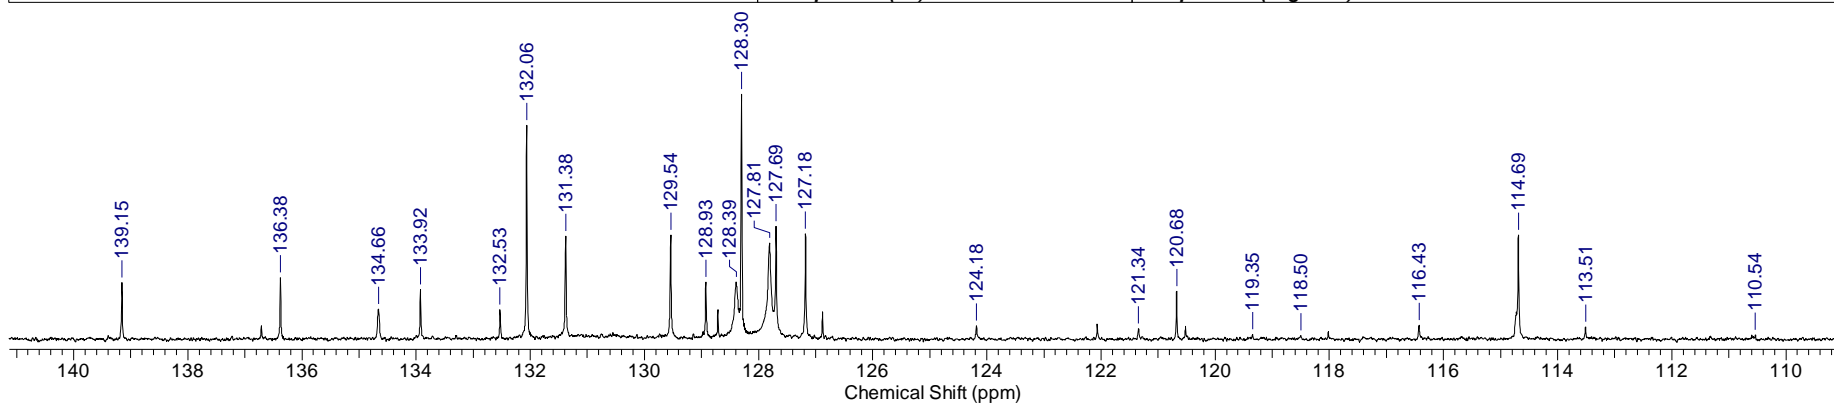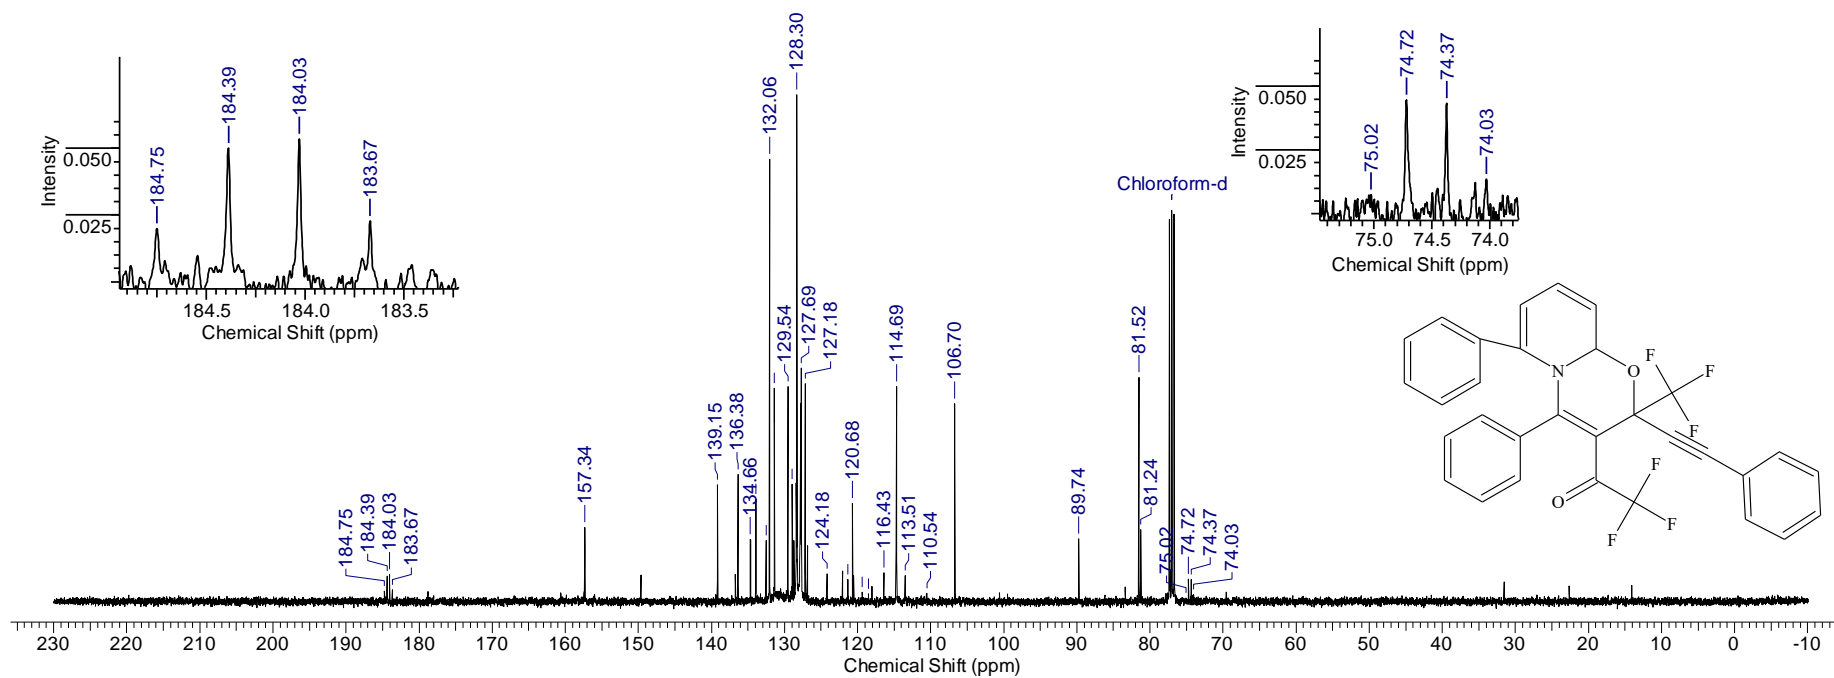

$^{13}\text{C}$  NMR spectrum of **3n** (100.6 MHz,  $\text{CDCl}_3$ )

|                        |          |                        |             |                      |                                                            |                       |        |
|------------------------|----------|------------------------|-------------|----------------------|------------------------------------------------------------|-----------------------|--------|
| Acquisition Time (sec) | 1.5000   | Date                   | Apr 15 2019 | File Name            | I:\SPEC_F_2019\2019.04.15\SZA-094k_20190415_01\FLUORINE_01 |                       |        |
| Frequency (MHz)        | 376.31   | Nucleus                | 19F         | Number of Transients | 4                                                          | Original Points Count | 133929 |
| Points Count           | 262144   | Pulse Sequence         | s2pul       | Solvent              | CHLOROFORM-D                                               |                       |        |
| Sweep Width (Hz)       | 89285.71 | Temperature (degree C) | 22.000      |                      |                                                            |                       |        |

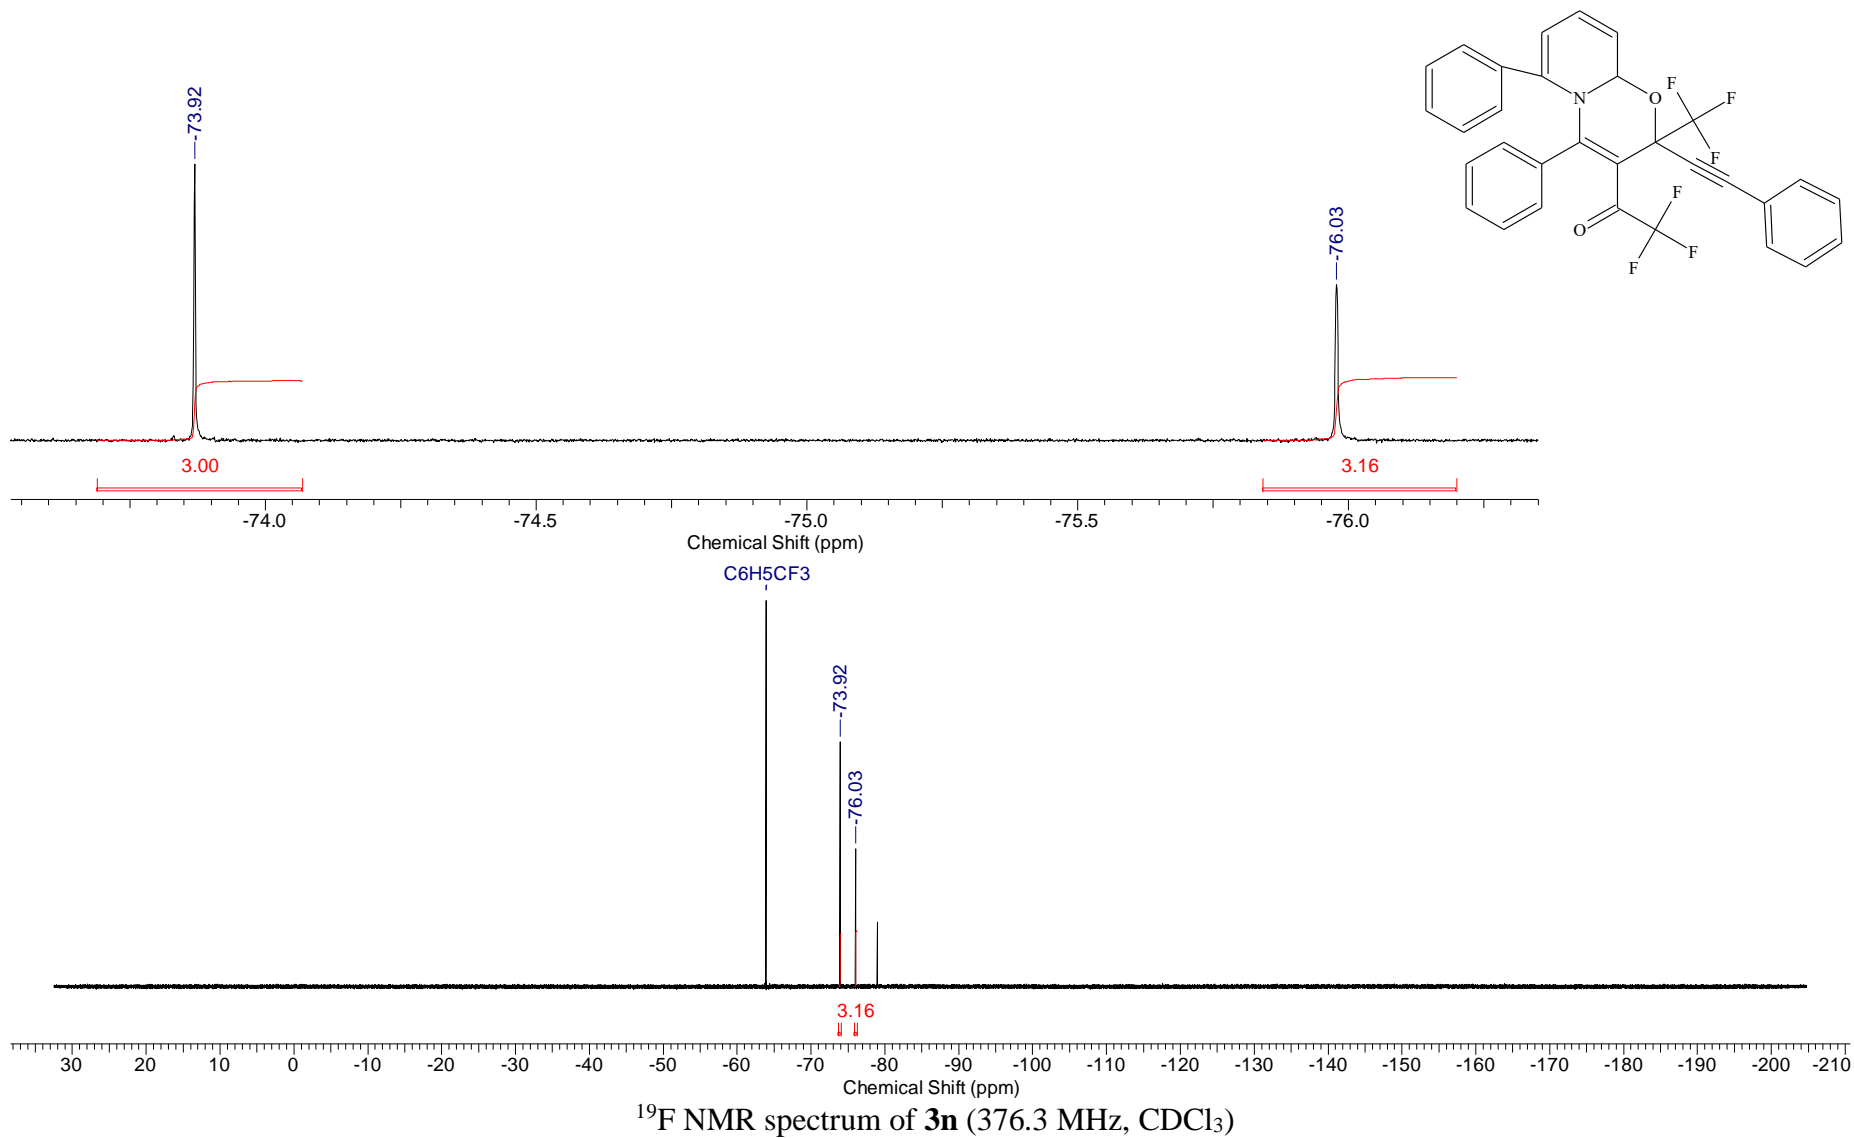

|                               |                                                 |                              |                      |                               |                      |
|-------------------------------|-------------------------------------------------|------------------------------|----------------------|-------------------------------|----------------------|
| <b>Acquisition Time (sec)</b> | 4.0894                                          | <b>Comment</b>               | Imported from UXNMR. | <b>Date</b>                   | 21 Feb 2019 12:43:54 |
| <b>File Name</b>              | I:\SPEC_2019_H_C\02.6 ääöäü\SA-035-3k_H_001001r | <b>Frequency (MHz)</b>       | 400.13               | <b>Nucleus</b>                | 1H                   |
| <b>Number of Transients</b>   | 5                                               | <b>Original Points Count</b> | 32768                | <b>Points Count</b>           | 131072               |
| <b>Solvent</b>                | CHLOROFORM-D                                    | <b>Sweep Width (Hz)</b>      | 8012.82              | <b>Pulse Sequence</b>         | zg30                 |
|                               |                                                 |                              |                      | <b>Temperature (degree C)</b> | 27.000               |

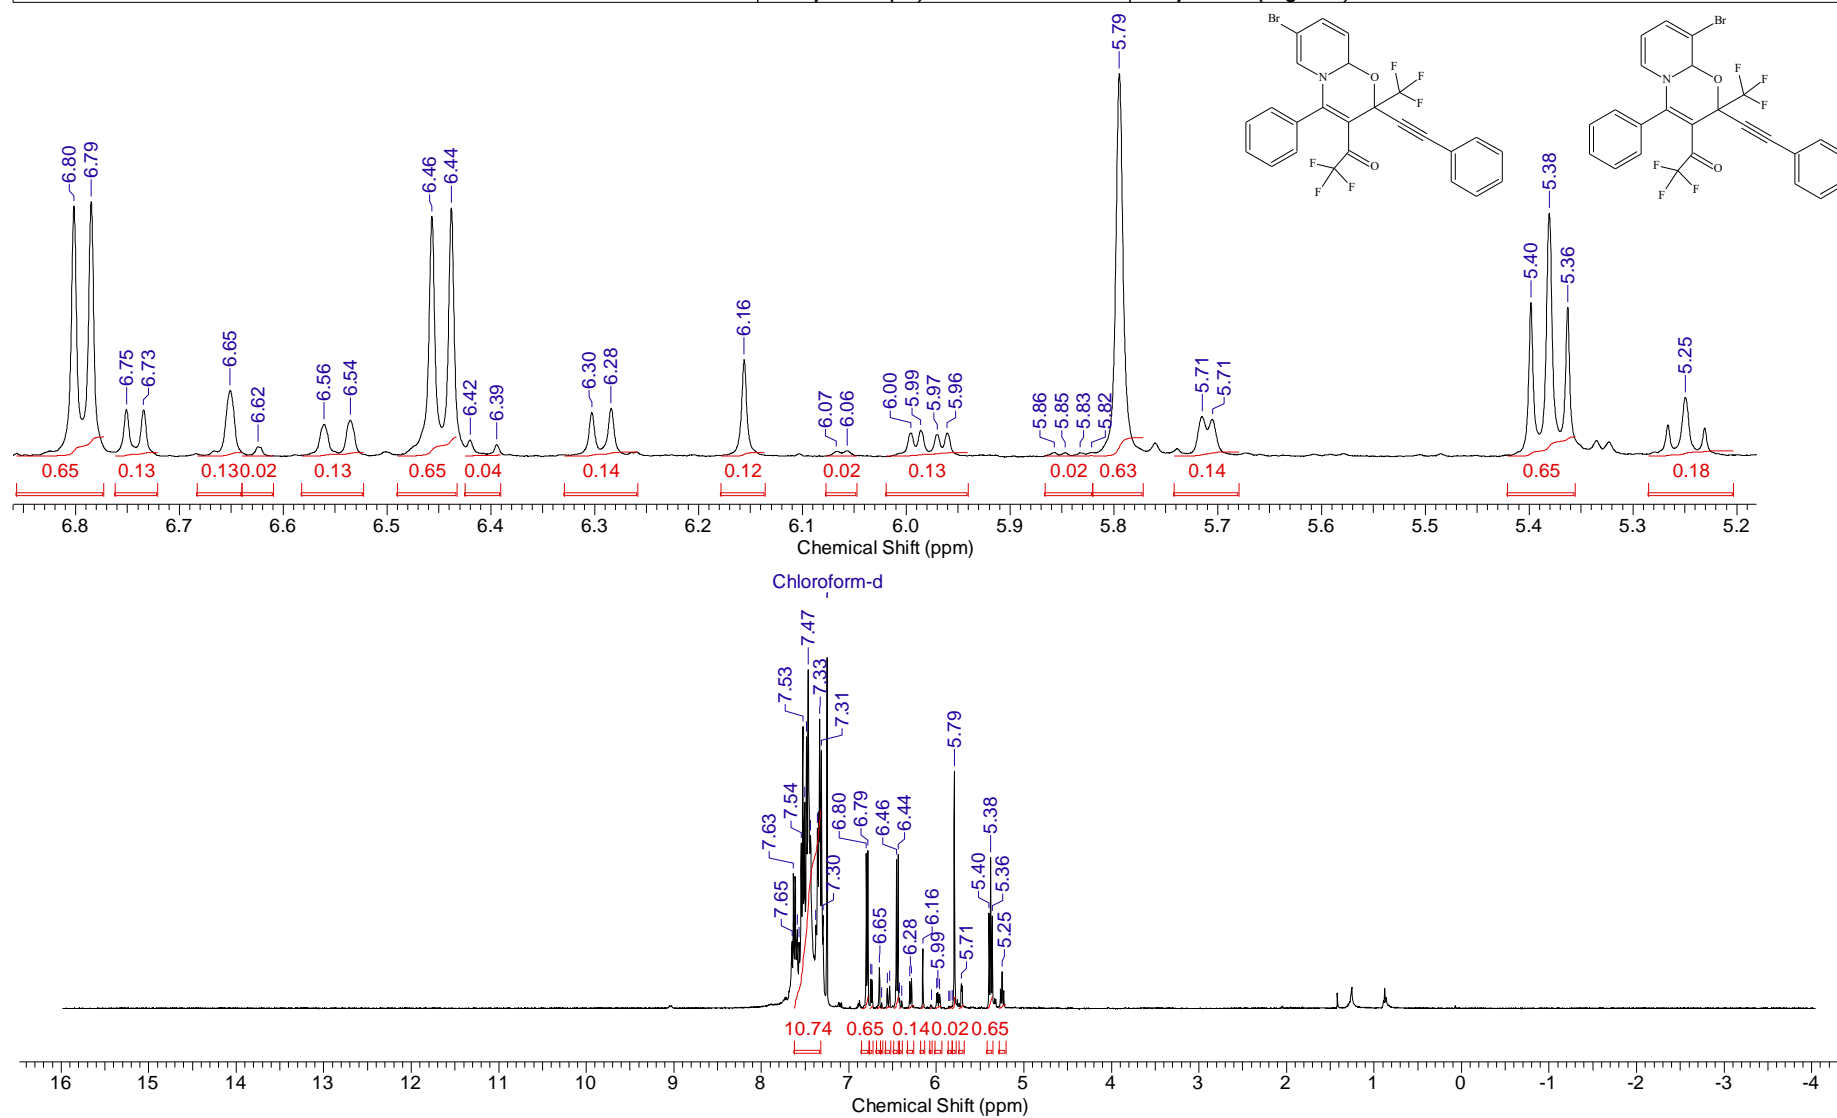

<sup>1</sup>H NMR spectrum of **3o** and **3p** (400.1 MHz, CDCl<sub>3</sub>)



|                               |                                                                 |                             |                      |                              |             |                               |        |
|-------------------------------|-----------------------------------------------------------------|-----------------------------|----------------------|------------------------------|-------------|-------------------------------|--------|
| <b>Acquisition Time (sec)</b> | 0.6783                                                          | <b>Comment</b>              | Imported from UXNMR. |                              | <b>Date</b> | 21 Feb 2019 14:02:20          |        |
| <b>File Name</b>              | F:\COMP_PRAKIDOC\OUTPUT_301\2019\02_6_äåöäü\SA-035-3k.C_002001r |                             |                      | <b>Frequency (MHz)</b>       | 100.61      |                               |        |
| <b>Nucleus</b>                | 13C                                                             | <b>Number of Transients</b> | 2074                 | <b>Original Points Count</b> | 16384       | <b>Points Count</b>           | 131072 |
| <b>Pulse Sequence</b>         | zpgp30                                                          | <b>Solvent</b>              | DMSO-D6              | <b>Sweep Width (Hz)</b>      | 24154.59    | <b>Temperature (degree C)</b> | 27.000 |

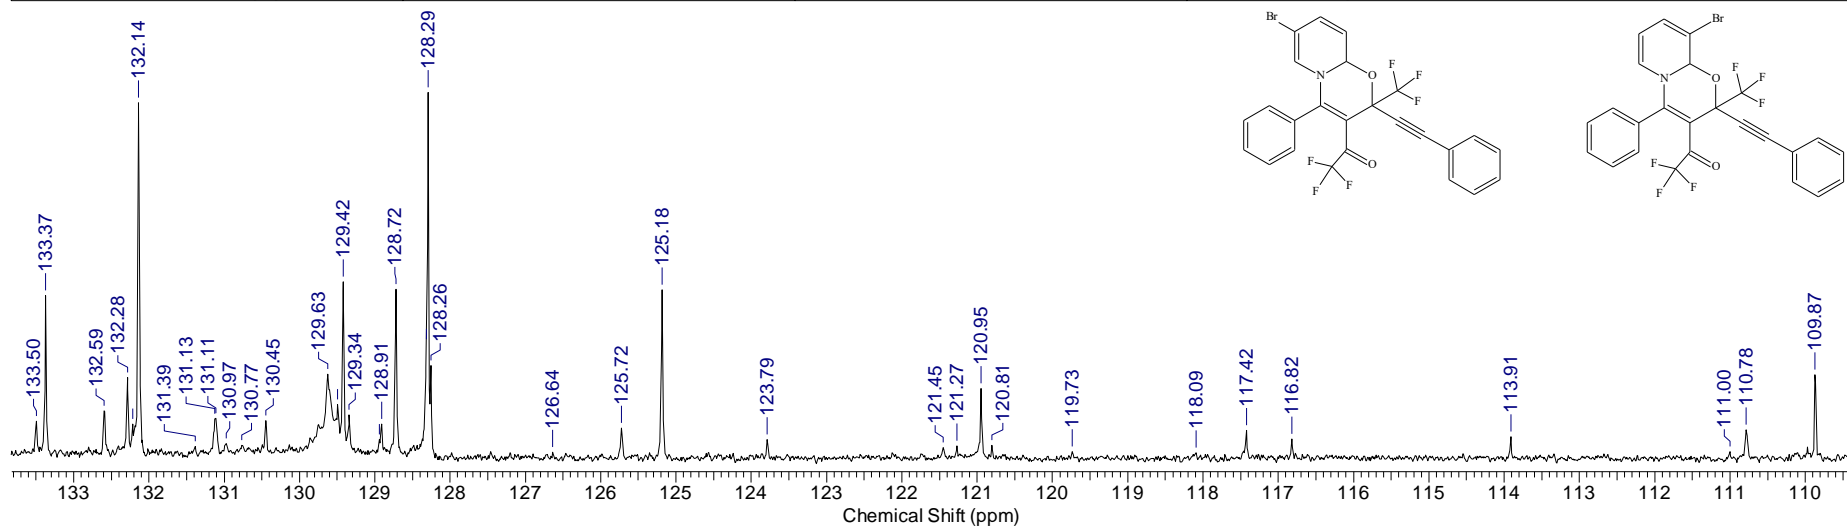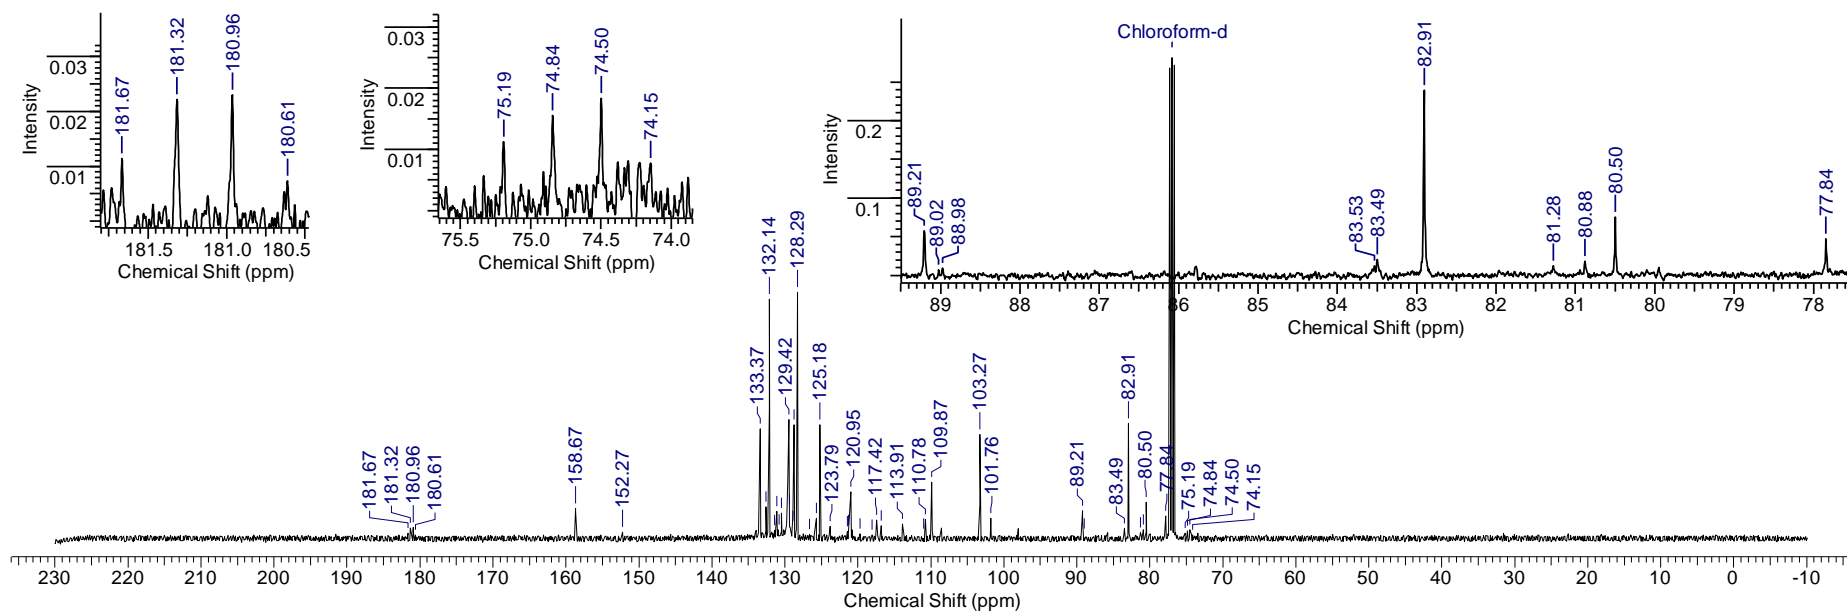

<sup>13</sup>C NMR spectrum of **3o** and **3p** (100.6 MHz, CDCl<sub>3</sub>)

|                        |          |                        |             |                      |                                                              |                             |
|------------------------|----------|------------------------|-------------|----------------------|--------------------------------------------------------------|-----------------------------|
| Acquisition Time (sec) | 1.0000   | Date                   | Feb 25 2019 | File Name            | I:\SPEC_F_2019\2019.02.25\SAZ-035-3k_20190225_01\FLUORINE_01 |                             |
| Frequency (MHz)        | 376.31   | Nucleus                | 19F         | Number of Transients | 16                                                           | Original Points Count 89286 |
| Points Count           | 131072   | Pulse Sequence         | s2pul       | Solvent              | CHLOROFORM-D                                                 |                             |
| Sweep Width (Hz)       | 89285.71 | Temperature (degree C) | 24.000      |                      |                                                              |                             |

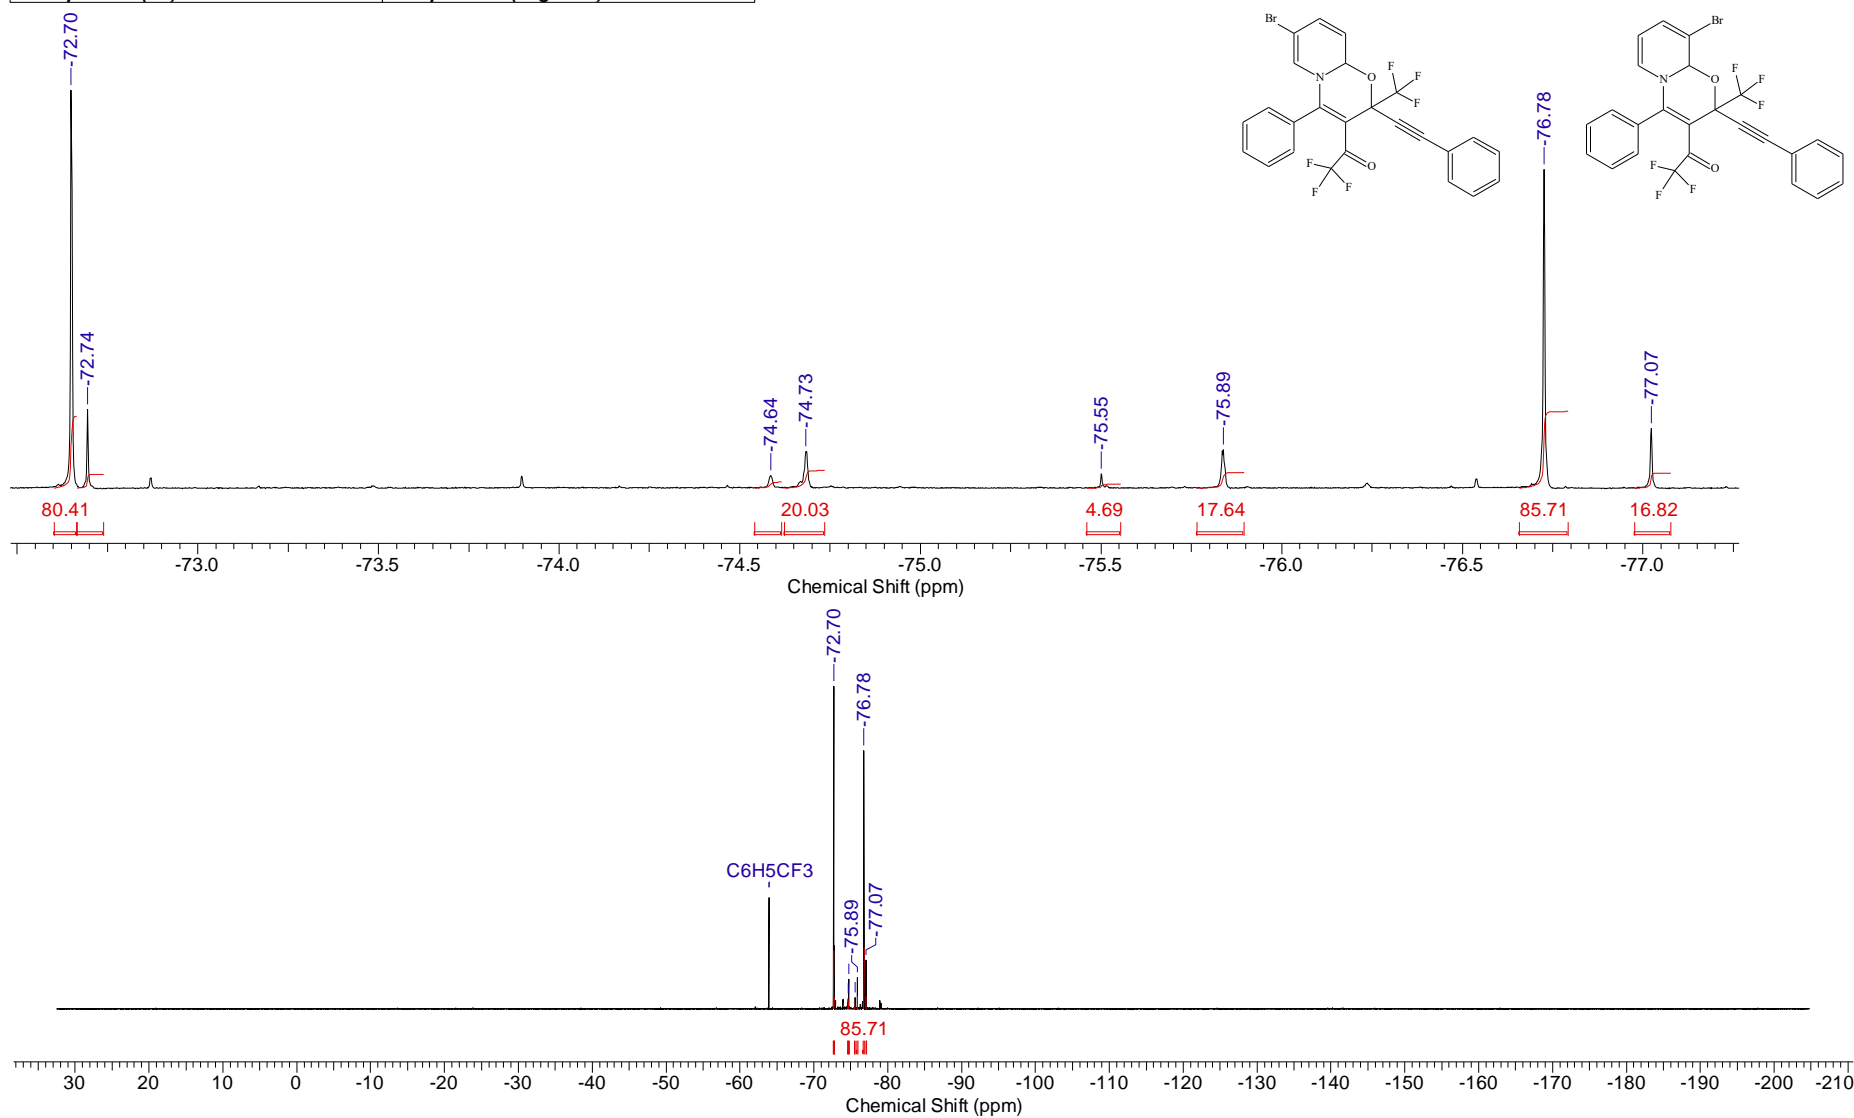

$^{19}\text{F}$  NMR spectrum of **3o** and **3p** (376.3 MHz,  $\text{CDCl}_3$ )

|                               |                                                                  |                             |                      |                              |                      |
|-------------------------------|------------------------------------------------------------------|-----------------------------|----------------------|------------------------------|----------------------|
| <b>Acquisition Time (sec)</b> | 4.0894                                                           | <b>Comment</b>              | Imported from UXNMR. | <b>Date</b>                  | 04 Feb 2019 15:11:38 |
| <b>File Name</b>              | F:\COMP_PRAK\DOCS\OUTPUT_301\2019\02.6 ääðäëü\SA-047-3.H_001001r | <b>Frequency (MHz)</b>      | 400.13               | <b>Points Count</b>          | 131072               |
| <b>Nucleus</b>                | 1H                                                               | <b>Number of Transients</b> | 4                    | <b>Original Points Count</b> | 32768                |
| <b>Pulse Sequence</b>         | zg30                                                             | <b>Solvent</b>              | CHLOROFORM-D         | <b>Sweep Width (Hz)</b>      | 8012.82              |
| <b>Temperature (degree C)</b> | 27.000                                                           |                             |                      |                              |                      |

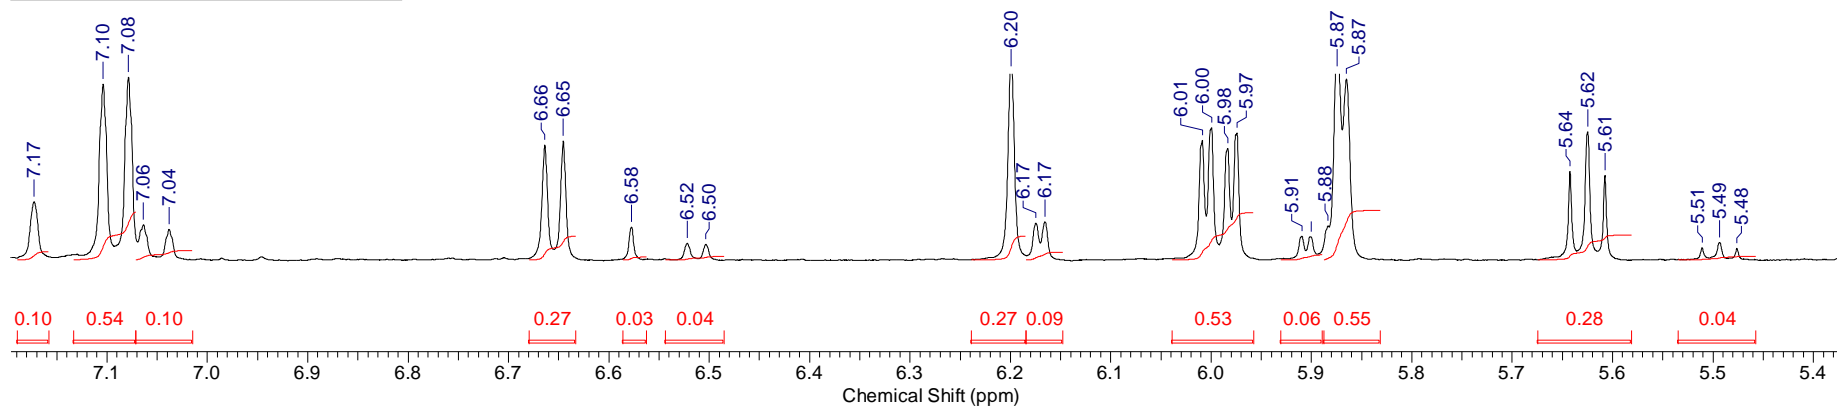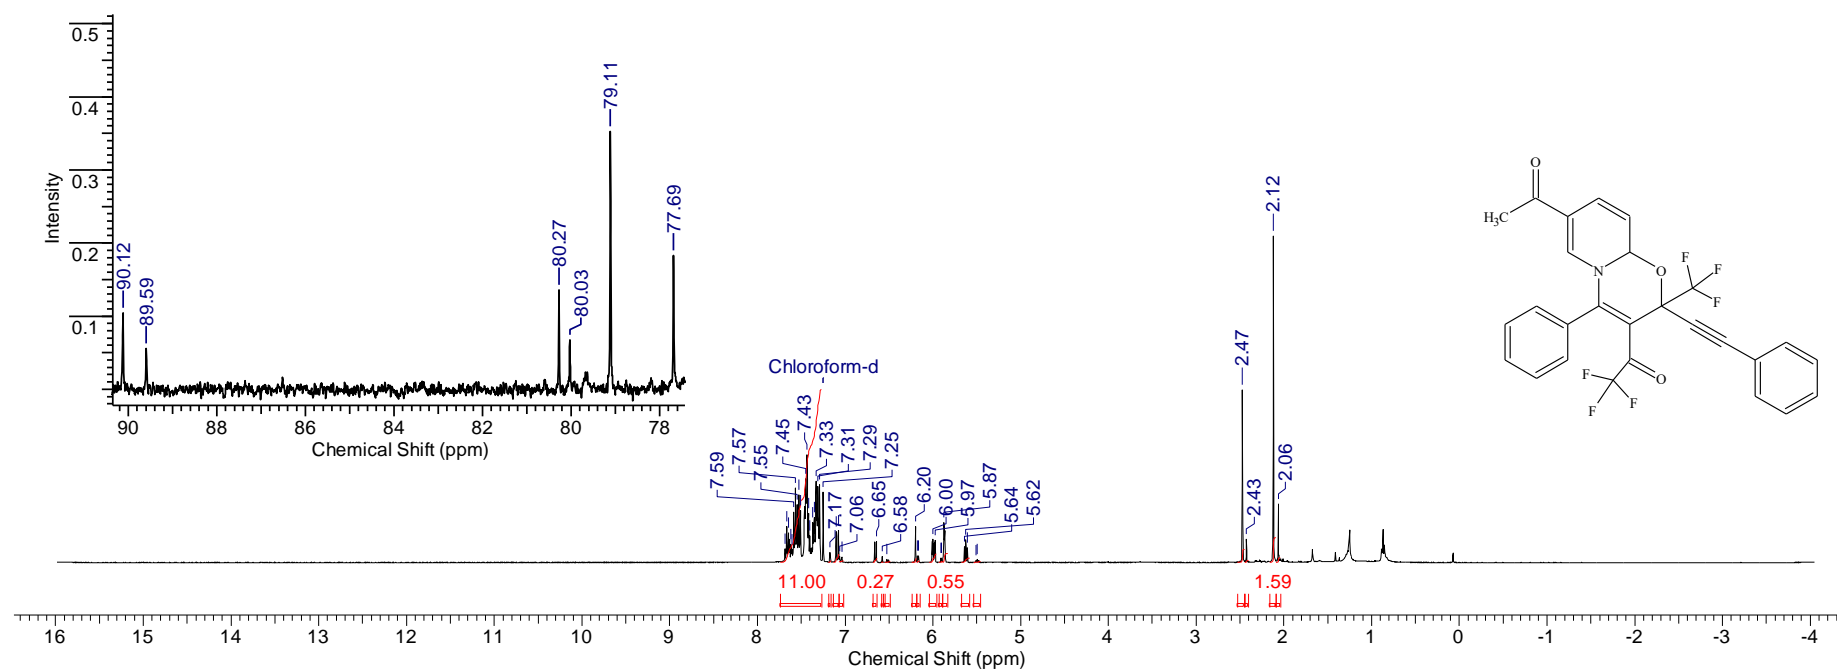

<sup>1</sup>H NMR spectrum of **3q** and **3r** (400.1 MHz, CDCl<sub>3</sub>)

|                               |                                                 |                              |                      |                               |                      |
|-------------------------------|-------------------------------------------------|------------------------------|----------------------|-------------------------------|----------------------|
| <b>Acquisition Time (sec)</b> | 0.6783                                          | <b>Comment</b>               | Imported from UXNMR. | <b>Date</b>                   | 04 Feb 2019 15:30:44 |
| <b>File Name</b>              | I:\SPEC_2019_H_C\02.6 ääöäü\SZA-047-3.C_002001r | <b>Frequency (MHz)</b>       | 100.61               | <b>Nucleus</b>                | <sup>13</sup> C      |
| <b>Number of Transients</b>   | 585                                             | <b>Original Points Count</b> | 16384                | <b>Points Count</b>           | 131072               |
| <b>Solvent</b>                | DMSO-D6                                         | <b>Sweep Width (Hz)</b>      | 24154.59             | <b>Temperature (degree C)</b> | 27.000               |
|                               |                                                 |                              |                      | <b>Pulse Sequence</b>         | zpgg30               |

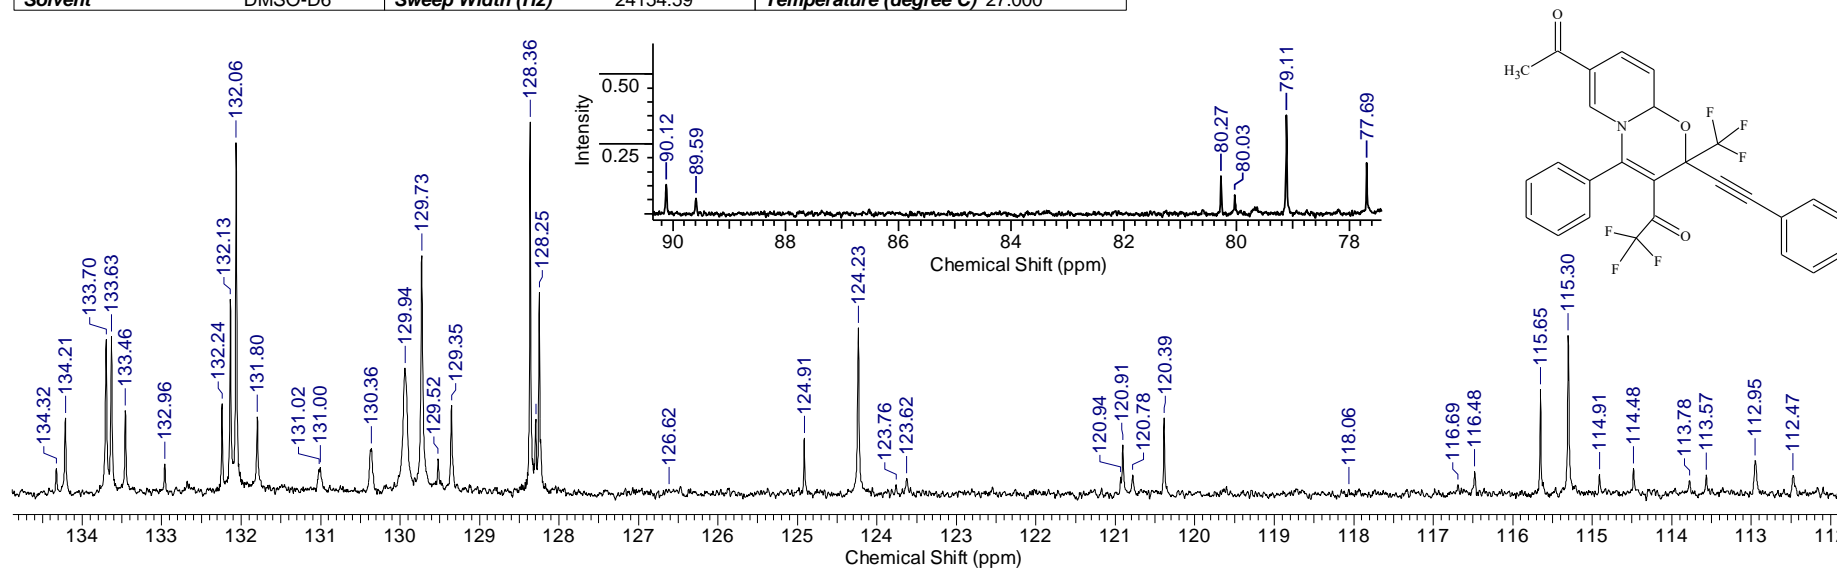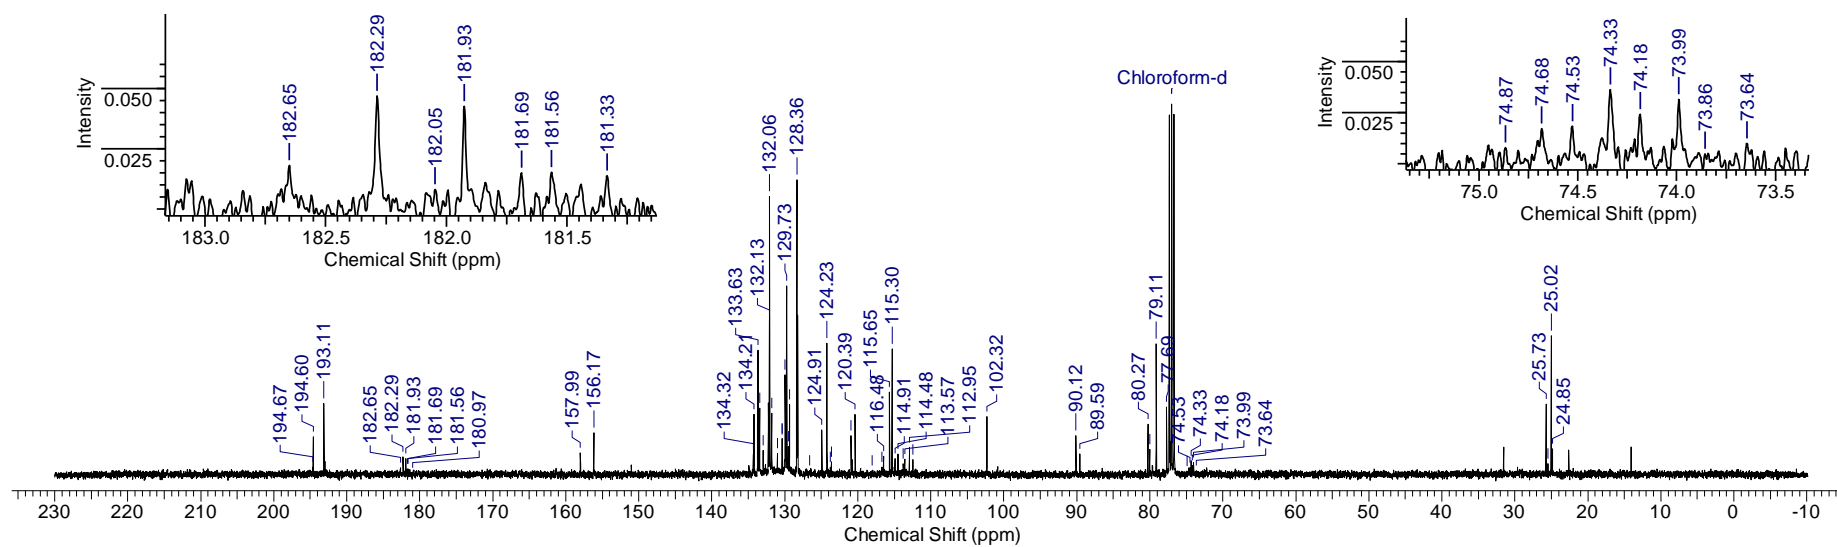

<sup>13</sup>C NMR spectrum of **3q** and **3r** (100.6 MHz, CDCl<sub>3</sub>)

|                        |                                                                               |                      |                 |                       |          |              |        |
|------------------------|-------------------------------------------------------------------------------|----------------------|-----------------|-----------------------|----------|--------------|--------|
| Acquisition Time (sec) | 1.0000                                                                        | Date                 | Feb 1 2019      |                       |          |              |        |
| File Name              | F:\COMP_PRAK\DOCS\OUTPUT_301\F19\2019.02.01\SA-047-31_20190201_01\FLUORINE_01 |                      | Frequency (MHz) | 376.31                |          |              |        |
| Nucleus                | 19F                                                                           | Number of Transients | 16              | Original Points Count | 89286    | Points Count | 131072 |
| Pulse Sequence         | s2pul                                                                         | Solvent              | CHLOROFORM-D    | Sweep Width (Hz)      | 89285.71 |              |        |
| Temperature (degree C) | 22.000                                                                        |                      |                 |                       |          |              |        |

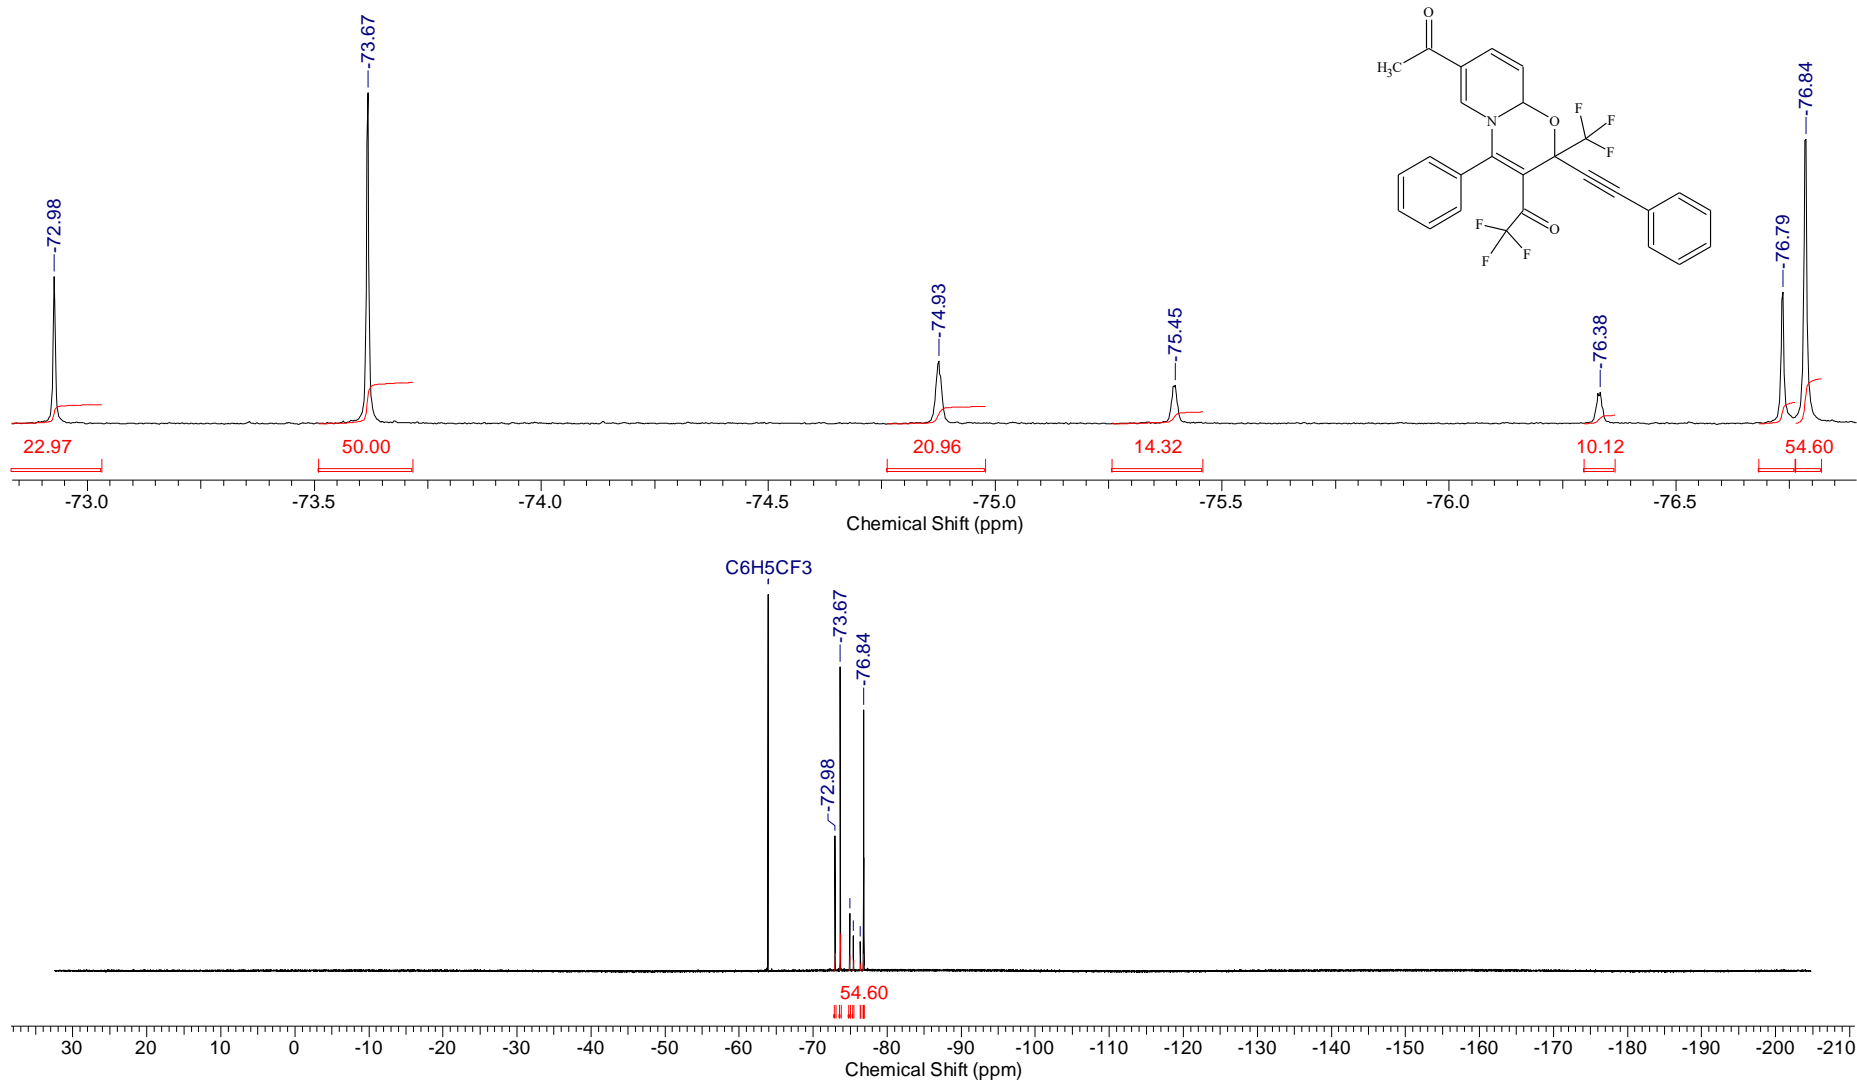

$^{19}\text{F}$  NMR spectrum of **3q** and **3r** (376.3 MHz,  $\text{CDCl}_3$ )

|                               |                                             |                              |                      |                               |                      |
|-------------------------------|---------------------------------------------|------------------------------|----------------------|-------------------------------|----------------------|
| <b>Acquisition Time (sec)</b> | 4.0894                                      | <b>Comment</b>               | Imported from UXNMR. | <b>Date</b>                   | 11 Apr 2019 12:19:14 |
| <b>File Name</b>              | I:\SPEC_2019_H\Cl04.äi ääü\SA-089.H_001001r | <b>Frequency (MHz)</b>       | 400.13               | <b>Nucleus</b>                | 1H                   |
| <b>Number of Transients</b>   | 4                                           | <b>Original Points Count</b> | 32768                | <b>Points Count</b>           | 131072               |
| <b>Solvent</b>                | CHLOROFORM-D                                | <b>Sweep Width (Hz)</b>      | 8012.82              | <b>Pulse Sequence</b>         | zg30                 |
|                               |                                             |                              |                      | <b>Temperature (degree C)</b> | 27.000               |

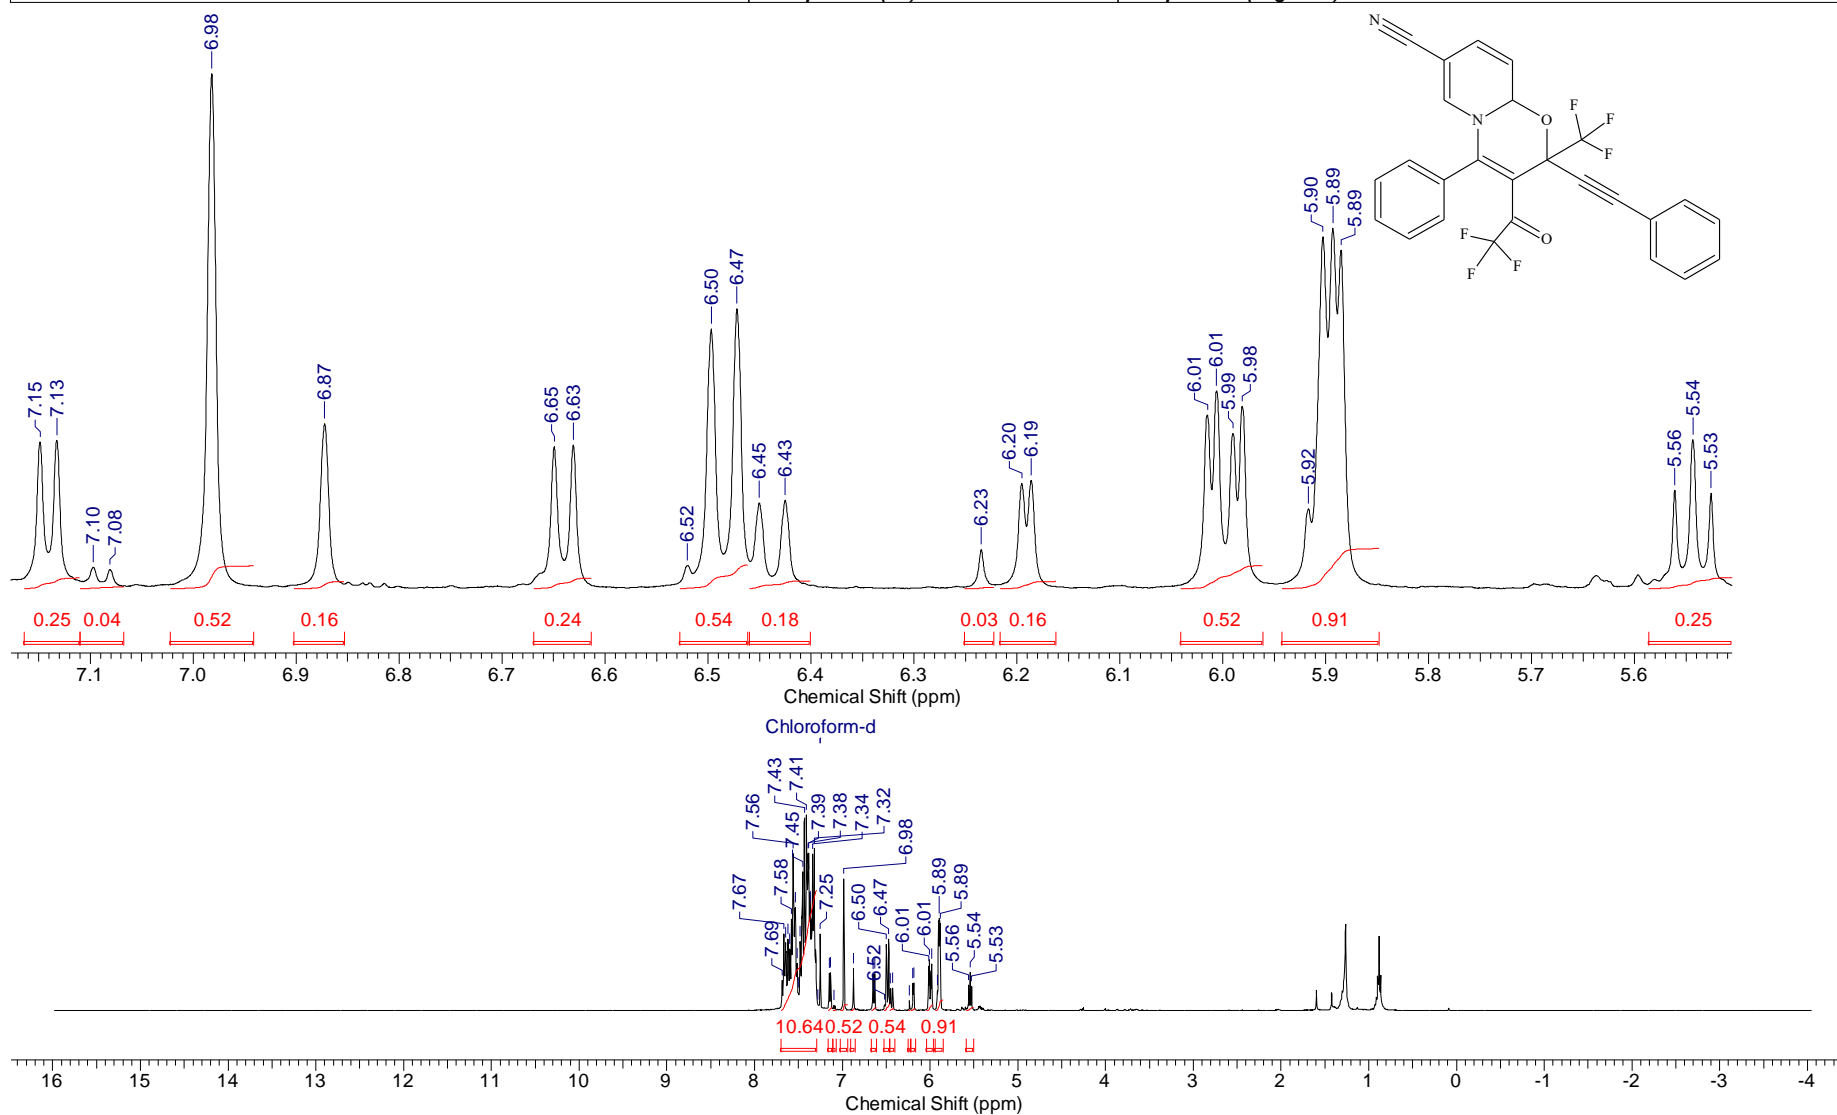

**<sup>1</sup>H NMR spectrum of 3s and 3t (400.1 MHz, CDCl<sub>3</sub>)**

|                               |                                            |                              |                      |                               |                      |
|-------------------------------|--------------------------------------------|------------------------------|----------------------|-------------------------------|----------------------|
| <b>Acquisition Time (sec)</b> | 0.6783                                     | <b>Comment</b>               | Imported from UXNMR. | <b>Date</b>                   | 11 Apr 2019 12:48:28 |
| <b>File Name</b>              | I:\SPEC_2019_H\04.år ðæü\SZA-089.C_002001r | <b>Frequency (MHz)</b>       | 100.61               | <b>Nucleus</b>                | 13C                  |
| <b>Number of Transients</b>   | 746                                        | <b>Original Points Count</b> | 16384                | <b>Points Count</b>           | 131072               |
| <b>Solvent</b>                | CHLOROFORM-D                               | <b>Sweep Width (Hz)</b>      | 24154.59             | <b>Pulse Sequence</b>         | zpgg30               |
|                               |                                            |                              |                      | <b>Temperature (degree C)</b> | 27.000               |

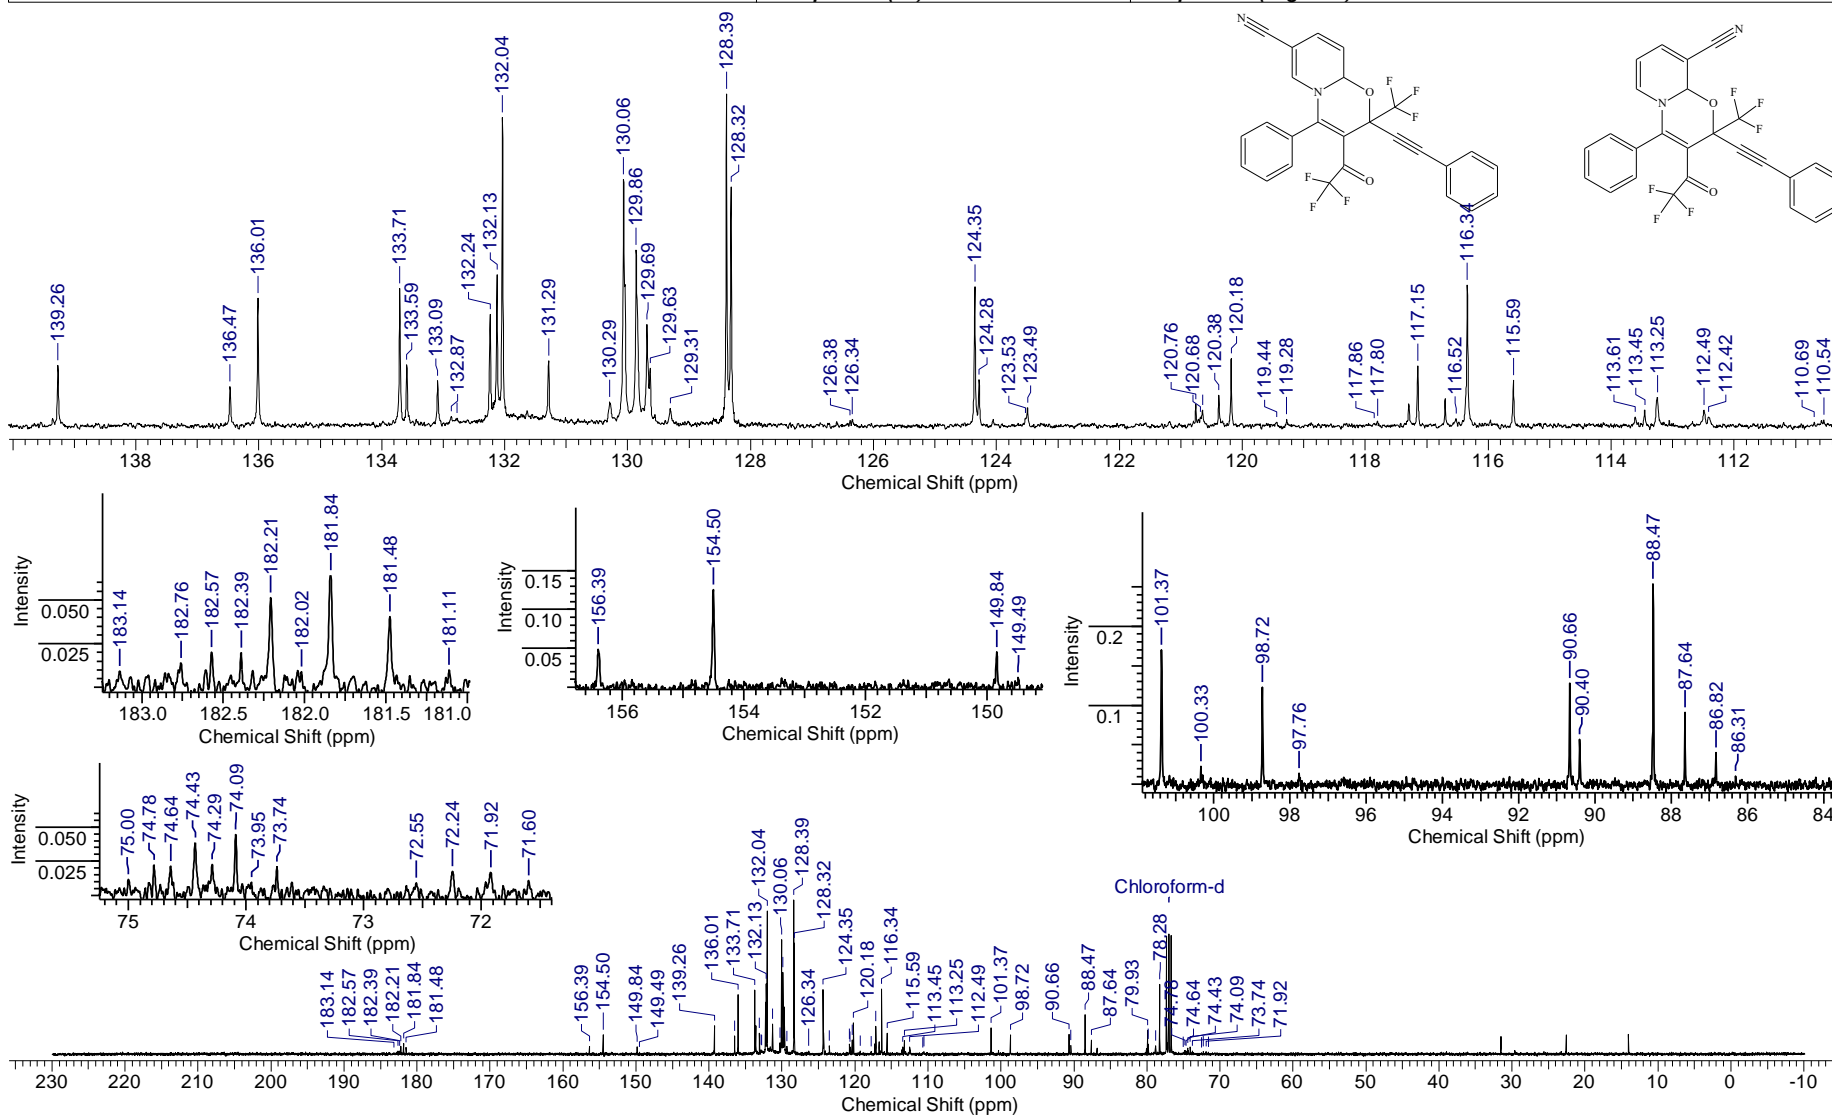

$^{13}\text{C}$  NMR spectrum of **3s** and **3t** (100.6 MHz,  $\text{CDCl}_3$ )

|                        |           |                        |                 |                      |                                                             |                       |        |
|------------------------|-----------|------------------------|-----------------|----------------------|-------------------------------------------------------------|-----------------------|--------|
| Acquisition Time (sec) | 2.3069    | Date                   | Apr 11 2019     | File Name            | I:\SPEC_F_2019\2019.04.11\SZA-089-F_20190411_01\FLUORINE_01 |                       |        |
| Frequency (MHz)        | 376.32    | Nucleus                | <sup>19</sup> F | Number of Transients | 8                                                           | Original Points Count | 262144 |
| Points Count           | 262144    | Pulse Sequence         | s2pul           | Solvent              | CHLOROFORM-D                                                |                       |        |
| Sweep Width (Hz)       | 113636.37 | Temperature (degree C) | 22.000          |                      |                                                             |                       |        |

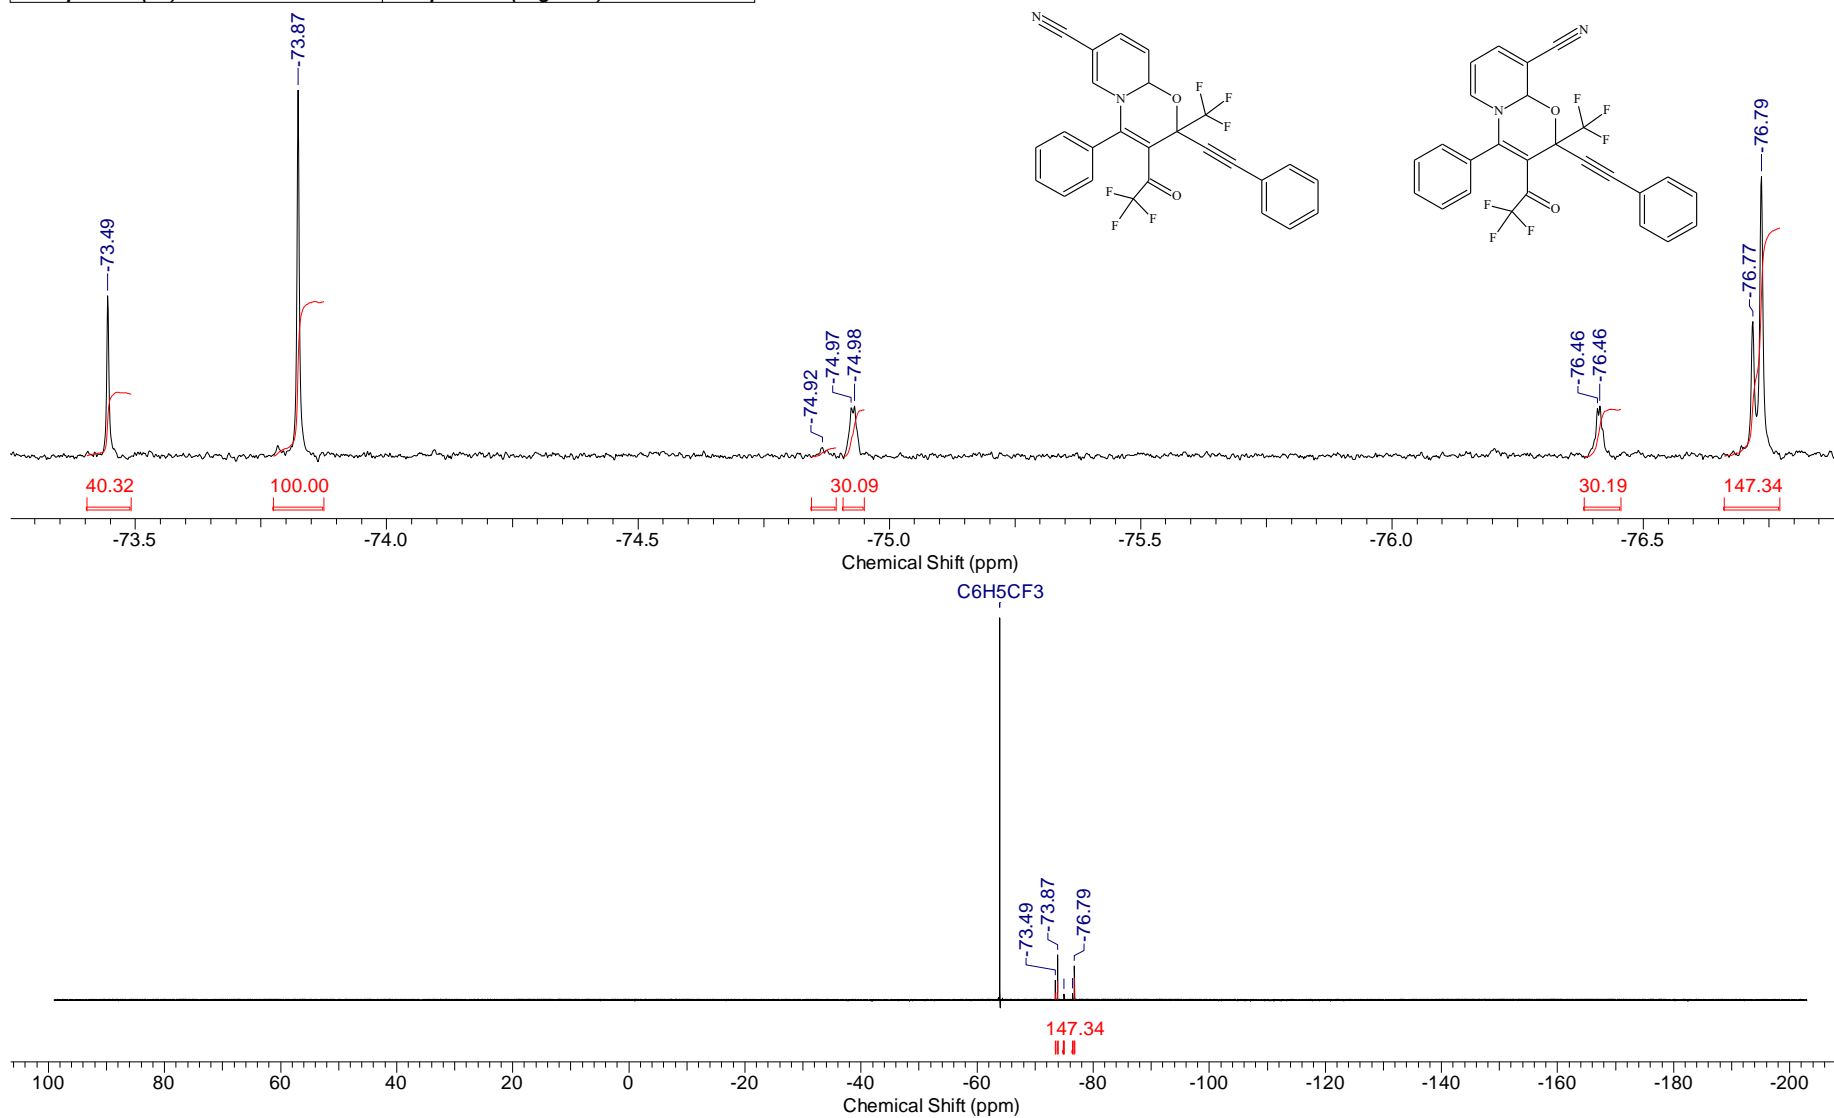

<sup>19</sup>F NMR spectrum of **3s** and **3t** (376.3 MHz, CDCl<sub>3</sub>)
